# Supplementary material
Source: PubMed Central journal article supplement (PMC2525662)

# Revisiting a Classic Approach to the *Aspidosperma* Alkaloids: An Intramolecular Schmidt Reaction-Mediated Synthesis of (+)-Aspidospermidine

Rajesh Iyengar, Klaas Schildknecht, Martha Morton, and Jeffrey Aubé\*

Department of Medicinal Chemistry, 1251 Wescoe Hall Drive, Room 4070, Malott Hall,  
University of Kansas, Lawrence, Kansas 66045-7582; jaube@ku.edu

## Supporting Information

### Details on Characterization of Selected Compounds

Compounds **28**, **6**, **29**, and **7** S-2

Compound **31** S-3

### Additional Experimental Details

General S-4

4-Benzyloxy-1-butanol S-4

4-Benzyloxybutyraldehyde S-4

6-Benzyloxy-1-hexen-3-ol S-5

7a*R*-Ethyl-1,2,3,6,7,7a-hexahydroinden-5-one (**9**) S-5

7a*R*-Ethyl-3*R*-hydroxy-1,2,3,6,7,7a-hexahydroinden-5-one S-6

6-Benzyloxy-1-hexen-3-one (**10**) S-6

3a*S*-Ethyl-3,3a,4,5-tetrahydro-2*H*-inden-1,6-dione (**15**) S-6

4-(2'-Bromoethyl)-7a*R*-ethyl-1,2,3,6,7,7a-hexahydroinden-5-one (**16a**) S-7

4-(2'-Chloroethyl)-7a*R*-ethyl-1,2,3,6,7,7a-hexahydroinden-5-one (**16b**) S-7

7-(2'-Chloroethyl)-3a*S*-ethyl-3,3a,4,5-tetrahydro-2*H*-indene-1,6-dione (**17**) S-7

7-(2'-Chloroethyl)-3a*S*-ethyl-7a*R*-hexahydroindene-1,6-dione (**18**) S-8

Cyclopropane **19** S-8

Cyclopropane **20** S-9

4-(2'-Azidoethyl)-7a*R*-ethyl-1,2,3,6,7,7a-hexahydroinden-5-one (**21**) S-9

4-(2'-Azidoethyl)-7a*R*-ethyl-3*S*-hydroxy-1,2,3,6,7,7a-hexahydroinden-5-one (**22**) S-9

5a*S*-Ethyl-8a*S*-decahydro-3-oxa-indacen-8-one (**24**) S-10

References S-10

### Copies of <sup>1</sup>H and <sup>13</sup>C NMR Spectra

Compound **9** S-11

Allylic oxidation of **9** S-13

Compound **15** S-15

4-Benzyloxy-1-butanol S-17

4-Benzyloxybutyraldehyde S-19

6-Benzyloxy-1-hexen-3-ol S-21

Compound **10** S-23

Compound **8** S-25

Compound **16a** S-27

Compound **16b** S-29

|                                           |      |
|-------------------------------------------|------|
| Compound <b>17</b>                        | S-31 |
| Compound <b>18</b> (proton spectrum only) | S-33 |
| Compound <b>19</b>                        | S-34 |
| Compound <b>20</b>                        | S-36 |
| Compound <b>21</b>                        | S-38 |
| Compound <b>22</b>                        | S-40 |
| Compound <b>24</b> (proton spectrum only) | S-42 |
| Compound <b>25</b>                        | S-43 |
| Compound <b>26</b>                        | S-45 |
| Compound <b>27</b>                        | S-47 |
| Compound <b>28</b>                        | S-49 |
| Compound <b>29</b>                        | S-51 |
| Compound <b>7</b>                         | S-53 |
| Compound <b>6</b>                         | S-55 |
| Compound <b>3</b>                         | S-57 |
| (+)-Aspidospermidine ( <b>1</b> )         | S-59 |
| Compound <b>31</b>                        | S-61 |

## Details on Characterization of Selected Compounds

**Compound 28.** In **28**, the CH<sub>3</sub> of the ethyl group appeared as a triplet at 0.88 ppm ( $J = 7.5$  Hz) in its <sup>1</sup>H NMR (Figure 1). <sup>1</sup>H-<sup>1</sup>H COSY then allowed the determination of the positions of the CH<sub>2</sub> of the ethyl group as being buried in the multiplets at 1.65 and 1.80 ppm. The ring fusion proton H<sub>a</sub> was again distinctive, appearing as a doublet at 1.81 ppm ( $J = 5.1$  Hz, the only proton expected to appear as a doublet in the molecule). That in turn coupled into the proton on the carbon bearing the side chain at 2.55 ppm. Using similar correlations, the protons on the side chain were identified. In order to determine the relative stereochemistry of the major isomer in **28**, the compound was subjected to 2D-NOE experiments, which revealed that the azide-containing side chain, H<sub>a</sub>, and the ethyl group were *cis* to each other. Hence the major isomer was determined as the one in which the side chain occupies a  $\beta$ -orientation as depicted.

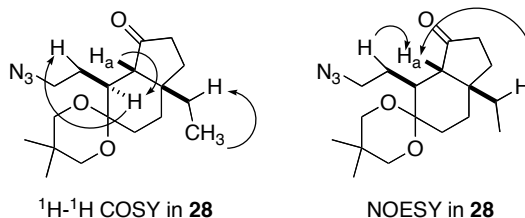

**Compound 6.** The point of entry for establishing the proton signals in **6** was the CH<sub>3</sub> (triplet at 1.0 ppm) of the ethyl group (Figure 2). COSY data then unambiguously established the positions of the CH<sub>2</sub> of the ethyl group (1.50 ppm), and protons at C-7 (triplet,  $J = 5.9$  Hz, 2.86 ppm) and C-21 (doublet,  $J = 5.0$  Hz, 3.63 ppm, furthest downfield). The protons at C-7, C-21 and the ethyl group at C-22 in **6** were determined to be *cis* to one other (<sup>1</sup>H NOE data, aspidospermidine numbering), thus establishing the stereochemistry of **6** as shown.

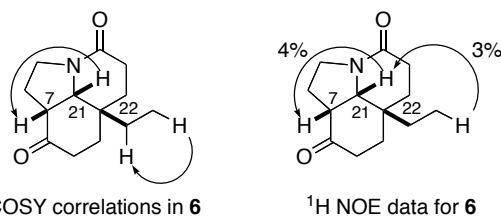

**Compound 29** was subjected to X-ray crystallographic analysis. The cif file of this structure is included as a separate piece of Supporting Information.

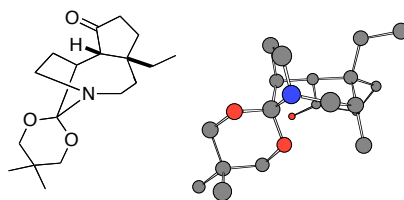

**Compound 7.** Selected <sup>1</sup>H NOE correlations in **7** are shown below.

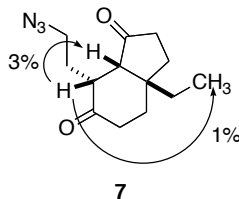

**Compound 31.** The molecular weight of 31 was determined to be 280 and thus having the probable molecular formula  $C_{19}H_{24}N_2$  (2 protons fewer than aspidospermidine). Also apparent from the  $^{13}C$  NMR of the compound was the presence of 8 aromatic signals indicating an intact indole ring system. DEPT analysis indicated the presence of 7 methylenes, 2 methines, 4 aromatic protons, and 1 methyl group in the molecule. In addition to the more routine signals, a key feature of the proton spectrum was 2 geminal protons ( $H_a$  and  $H_b$ , 2.51 and 2.79 ppm,  $J = 15.0$  Hz) that were coupled only to each other (Figure 5). HMQC (single-bond  $1H-^{13}C$  correlations) assigned all the protons to their respective carbons and HMBC data (2,3-bond  $1H-^{13}C$  correlations) showed that  $H_a$  and  $H_b$  correlated into the indole system, the carbon bearing the ethyl group, and the carbon of  $H_c$ .  $H_c$  was coupled to  $H_d$  as determined by  $1H-1H$  COSY experiments. These results set up **32** to be the probable partial structure. Stereochemical assignments were then deduced by 1D and 2D NOE experiments as depicted.

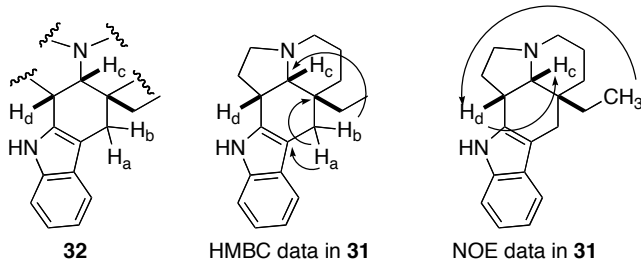

### Additional Experimental Details

**General.**  $^1H$  and  $^{13}C$  NMR spectra were recorded at the field strengths noted for particular compounds. All NMR samples were dissolved in  $CDCl_3$ , and the chemical shifts are expressed in parts per million ( $\delta$ ) relative to tetramethylsilane as an internal reference. Abbreviations are s, singlet; d, doublet; t, triplet; q, quartet; br, broad; m, multiplet. Melting points are uncorrected. All mass spectra measurements were carried out in-house. Optical rotations were taken on at ambient temperature; the concentrations are reported in g/100 mL. Elemental analyses were performed in-house. All chromatography was performed using silica gel (32-63 mesh) with the indicated solvent mixtures. Tetrahydrofuran was distilled from sodium benzophenone ketyl, dichloromethane and triethylamine were distilled from calcium hydride, and all other solvents were used without further purification. Reaction flasks were flame-dried and cooled under argon, and all reactions were conducted under a positive pressure of dry argon.

**4-Benzyloxy-1-butanol.**<sup>1</sup> 1,4-Butanediol (20.3 g, 226 mmol) was added dropwise to an ice-cooled suspension of sodium hydride (4.33 g, 180 mmol) in DMF (200 mL). The resulting mixture was warmed to rt, treated with benzyl bromide (30.9 g, 180 mmol), and allowed to react for 20 h. The reaction mixture was then poured into  $H_2O$ , and extracted with  $Et_2O$ . The combined organic layers were washed with brine, dried over  $MgSO_4$ , and concentrated in vacuo to yield a light yellow oil (27.9 g, 86%). IR (film)  $3390\text{ cm}^{-1}$ ;  $^1H$  NMR (400 MHz,  $CDCl_3$ )  $\delta$  1.72 (m, 4H), 2.40 (br s, 1H), 3.54 (t,  $J = 5.6$  Hz, 2H), 3.66 (t,  $J = 5.7$  Hz, 2H), 4.55 (s, 2H), 7.34 (m, 5H);  $^{13}C$  NMR (75 MHz,  $CDCl_3$ )  $\delta$  27.1, 30.5, 63.1, 70.8, 73.5, 128.1, 128.2, 128.8, 138.6; CIMS  $m/z$  (relative intensity) 181 ( $MH^+$ , 100), 136 (50), 91 (95).

**4-Benzyloxybutyraldehyde.**<sup>1</sup> PCC (40.5 g, 188 mmol) was added in a single portion to a solution of the above alcohol (22.5 g, 125 mmol) in  $CH_2Cl_2$  (300 mL)

maintained at rt. After 3 h, the reaction mixture was diluted with Et<sub>2</sub>O (300 mL) and filtered through a silica gel plug. The filtrate was concentrated to approximately 50 mL and the resulting solution was distilled under high vacuum to yield 12.9 g (58%) of the title compound (bp 115–118 °C/1.0 Torr) as a clear liquid. IR (film) 1715 cm<sup>-1</sup>; <sup>1</sup>H NMR (300 MHz, CDCl<sub>3</sub>)  $\delta$  1.95 (m, 2H), 2.55 (t, *J* = 7.1 Hz, 2H), 3.50 (t, *J* = 6.1 Hz, 2H), 4.50 (s, 2H), 7.30 (m, 5H), 9.78 (s, 1H); <sup>13</sup>C NMR (75 MHz, CDCl<sub>3</sub>)  $\delta$  22.6, 40.9, 69.2, 72.9, 127.6, 128.4, 138.3, 202.2; CIMS *m/z* (relative intensity) 179 (MH<sup>+</sup>, 60), 91 (100).

**6-Benzoyloxy-1-hexen-3-ol.** A solution of the above aldehyde (10.9 g, 61.0 mmol) in THF (20 mL) was added dropwise to a rt solution of vinyl magnesium bromide (1 M in THF, 80.0 mL, 80.0 mmol). The reaction mixture was stirred for an additional 30 min before it was carefully poured over ice-cold 1 M HCl and extracted with Et<sub>2</sub>O. The combined organic layers were washed successively with H<sub>2</sub>O and brine, dried over MgSO<sub>4</sub> and concentrated in vacuo. The resulting oil was distilled under high vacuum to yield 11.1 g (88%) of the title compound (bp 145-155 °C/1.0 Torr) as a clear thin oil. IR (film) 3400 cm<sup>-1</sup>; <sup>1</sup>H NMR (400 MHz, CDCl<sub>3</sub>)  $\delta$  1.82-1.60 (m, 4H), 2.50 (br s, 1H), 3.54 (t, *J* = 5.9 Hz, 2H), 4.16 (q, *J* = 5.9 Hz, 1H), 4.54 (s, 2H), 5.12 (d, *J* = 10.4 Hz, 1H), 5.25 (d, *J* = 17.2 Hz, 1H), 5.90 (ddd, *J* = 17.0, 10.6, 6.1 Hz, 1H), 7.32 (m, 5H); <sup>13</sup>C NMR (100 MHz, CDCl<sub>3</sub>)  $\delta$  26.2, 34.7, 70.8, 73.1, 73.4, 114.9, 128.06, 128.12, 128.8, 138.6, 141.5; CIMS *m/z* (relative intensity) 207 (MH<sup>+</sup>, 15), 189 (100), 171 (50). Anal. calcd for C<sub>13</sub>H<sub>18</sub>O<sub>2</sub>: C, 75.69; H, 8.79, found: C, 75.57; H, 9.00.

**7aR-Ethyl-1,2,3,6,7,7a-hexahydroinden-5-one (9).** A solution of 2-ethylcyclopentanone<sup>2</sup> (5.36 g, 47.9 mmol), (*S*)- $\alpha$ -methylbenzylamine (5.22 g, 43.1 mmol) and *p*-TsOH (0.01 g) in benzene (50 mL) was thoroughly degassed and then allowed to reflux for 24 h using a Dean-Stark trap to remove H<sub>2</sub>O. After the theoretical amount of H<sub>2</sub>O had been removed, the remaining benzene was distilled off at atmospheric pressure and the crude imine pot residue was cooled to rt and used directly in the next step. Methyl vinyl ketone (3.93 g, 56 mmol) and hydroquinone (ca. 0.025 g) were added to the imine and the resulting solution was heated at 60 °C for 44 h, cooled to rt, diluted with aqueous acetic acid (10%, 30 mL) and MeOH (15 mL), and the resulting biphasic solution was stirred vigorously for 2 h. The mixture was then poured over 1 M HCl and extracted with Et<sub>2</sub>O. The combined organic layers were successively washed with saturated aqueous NaHCO<sub>3</sub> and brine, dried over MgSO<sub>4</sub>, and concentrated in vacuo. The resulting residue was added to a solution of sodium methoxide (3.0 g, 86.2 mmol) in methanol (70 mL) and allowed to reflux for 24 h. After this time, the reaction mixture was cooled to rt and 1N HCl was added in a dropwise manner until the pH was adjusted to 2.0 and the reaction mixture stirred for an additional 15 min. The aqueous layer was extracted with Et<sub>2</sub>O (6  $\times$  100 mL) and the organic layer washed with a saturated aqueous solution of NaHCO<sub>3</sub> (3  $\times$  100 mL), H<sub>2</sub>O (1  $\times$  100 mL), brine (1  $\times$  100 mL), dried over MgSO<sub>4</sub>, concentrated and purified by distillation to afford 2.2 g (31%) of **9** (*R<sub>f</sub>* = 0.72, 30% EtOAc/hexanes) as a clear oil. IR (neat ) 2968, 2881, 1675 cm<sup>-1</sup>; <sup>1</sup>H NMR (400 MHz, CDCl<sub>3</sub>)  $\delta$  0.93 (t, *J* = 7.4 Hz, 3H), 1.20-1.32 (m, 1H), 1.38-1.52 (m, 2H), 1.63 (dt, *J* = 13.7, 5.2 Hz, 1H), 1.75-1.90 (m, 2H), 1.96-2.00 (m, 1H), 2.17-2.32 (m, 2H), 2.38-2.50 (m, 2H), 2.60-2.72 (m, 1H), 5.78 (s, 1H); <sup>13</sup>C NMR (100 MHz, CDCl<sub>3</sub>)  $\delta$  8.9, 20.9, 25.4,

30.8, 31.2, 33.2, 35.7, 45.8, 120.9, 179.2, 199.4; CIMS  $m/z$  (relative intensity) 165 ( $MH^+$ , 100), 136 (16), 122 (18); HRMS calcd for  $C_{11}H_{17}O$ : 165.1279, found: 165.1267.

**7aR-Ethyl-3R-hydroxy-1,2,3,6,7,7a-hexahydroinden-5-one.** The enone **9** (0.039 g, 0.24 mmol) and *p*-TsOH (0.011 g, 0.06 mmol) were added to isopropenylacetate (5 mL) and the reaction mixture heated at 105 °C for 1.5 h. After this time the reaction mixture was cooled to room temperature and diluted with  $Et_2O$  (50 mL). The organic layer was washed with a saturated aqueous solution of  $NaHCO_3$  (10 mL),  $H_2O$  (10 mL), dried over  $MgSO_4$ , concentrated to a light brown oil that was used in the next step without purification.

The crude dienol acetate was dissolved in acetone (3 mL), followed by the addition of  $H_2O$  (1 mL), a saturated aqueous solution of  $NaHCO_3$  (1 mL) and Oxone (0.40 g). The resulting reaction mixture was stirred at rt for 45 min. The reaction mixture was diluted with  $H_2O$  (5 mL) and the aqueous layer was extracted with  $EtOAc$  (2  $\times$  20 mL). The organic layer was washed with brine, dried over  $MgSO_4$  and concentrated to give the title compound ( $R_f$  = 0.28, 30%  $EtOAc$ /hexanes) as a colorless oil that was used in the next step without purification.  $[\alpha]_D^{25} = -66.2$  ( $c$  1.7,  $CH_2Cl_2$ ); IR (neat) 3405, 2960, 1666  $cm^{-1}$ ;  $^1H$  NMR (400 MHz,  $CDCl_3$ )  $\delta$  0.92 (t,  $J$  = 7.4 Hz, 3H), 1.43-1.64 (m, 4H), 1.75-1.87 (m, 3H), 2.17 (ddd,  $J$  = 2.0, 5.0, 15.0 Hz, 1H), 2.25-2.29 (m, 1H), 2.35 (m, 1H), 2.42-2.46 (m, 1H), 4.78 (dt,  $J$  = 2.0, 8.0 Hz, 1H), 5.94 (d,  $J$  = 2.0 Hz, 1H);  $^{13}C$  NMR (100 MHz,  $CDCl_3$ )  $\delta$  9.1, 29.1, 32.2, 32.5, 33.0, 33.7, 43.2, 73.2, 119.2, 178.9, 199.6; CIMS  $m/z$  (relative intensity) 181 ( $MH^+$ , 100), 124 (14); HRMS calcd for  $C_{11}H_{17}O_2$ : 181.1228, found: 181.1231.

**6-Benzyloxy-1-hexen-3-one (10).**<sup>3</sup> Jones reagent (8 M in  $H_2O$ , 21.0 mL, 168 mmol) was added dropwise to a 0 °C solution of the above alcohol (11.1 g, 53.8 mmol) dissolved in 20 mL of acetone. After the addition was complete the reaction was poured over  $H_2O$  and extracted with  $Et_2O$ . The combined organic layers were washed with brine, dried over  $MgSO_4$ , and concentrated in vacuo. The resulting residue was treated with ca. 200 mg of hydroquinone and distilled under high vacuum to yield 8.80 g (80%) of **10** (bp 135-145 °C/1.0 Torr) as a light yellow oil. IR (film) 1690, 1670  $cm^{-1}$ ;  $^1H$  NMR (400 MHz,  $CDCl_3$ )  $\delta$  1.97 (m, 2H), 2.75 (t,  $J$  = 7.2 Hz, 2H), 3.54 (t,  $J$  = 6.1 Hz, 2H), 4.55 (s, 2H), 5.84 (dd,  $J$  = 10.4, 1.2 Hz, 1H), 6.25 (dd,  $J$  = 17.7, 1.2 Hz, 1H), 6.38 (dd,  $J$  = 17.7, 10.4 Hz, 1H), 7.35 (m, 5H);  $^{13}C$  NMR (100 MHz,  $CDCl_3$ )  $\delta$  24.4, 36.6, 69.6, 69.7, 73.3, 116.5, 128.0, 128.1, 128.5, 128.8, 137.0, 138.8, 201.0; CIMS  $m/z$  (relative intensity) 205 ( $MH^+$ , 20), 97 (90).

**3aS-Ethyl-3,3a,4,5-tetrahydro-2H-inden-1,6-dione (15).** The above alcohol (1.52 mmol) was dissolved in  $CH_2Cl_2$  (7 mL) and PCC (0.65 g, 3.04 mmol) was added in one portion. The reaction mixture was stirred at rt for 1.5 h after which time the organic layer was filtered through a pad of silica gel, concentrated and purified by chromatography (10%  $EtOAc$ /hexanes) to afford 0.226 g of **15** (84% from **9**) as a yellow solid. Mp = 107-109 °C;  $[\alpha]_D^{25} = -289.2$  ( $c$  0.204,  $CHCl_3$ ); IR (neat) 2960, 2881, 1728, 1684  $cm^{-1}$ ;  $^1H$  NMR (400 MHz,  $CDCl_3$ )  $\delta$  1.02 (t,  $J$  = 7.4 Hz, 3H), 1.53-1.64 (m, 3H), 1.84 (dt,  $J$  = 13.7, 5.5 Hz, 1H), 2.28-2.39 (m, 2H), 2.47-2.55 (m, 4H), 6.30 (s, 1H);  $^{13}C$  NMR (100 MHz,  $CDCl_3$ )  $\delta$  9.3, 26.8, 30.5, 32.8, 33.7, 36.0, 42.9, 122.7, 161.7, 200.1,

207.6; CIMS  $m/z$  (relative intensity) 179 ( $MH^+$ , 100), 150 (37), 137 (28), 121 (16), 107 (11), 93 (11), 79 (15), 65 (12); HRMS calcd for  $C_{13}H_{20}BrO$  ( $M^+ + H$ ): 271.0698, found: 271.0710.

**4-(2'-Bromoethyl)-7a*R*-ethyl-1,2,3,6,7,7a-hexahydroinden-5-one (16a).** Boron tribromide (1 M in  $CH_2Cl_2$ , 1.34 mL, 1.34 mmol) was added dropwise to a  $-78$  °C solution of benzyl ether **8** (0.20 g, 0.67 mmol) in  $CH_2Cl_2$  (2 mL). The reaction was then allowed to stir without external cooling for 3 h before it was poured over saturated aqueous  $NaHCO_3$ , extracted with  $CH_2Cl_2$ , dried over  $Na_2SO_4$ , and concentrated in vacuo. The resulting crude product residue was purified by chromatography (20%  $Et_2O$ /hexanes) to yield 0.10 g (55%) of **16a** ( $R_f = 0.30$ , 20%  $Et_2O$ /hexanes) as a clear oil.  $[\alpha]_D = -27.4$  ( $c$  1.2,  $CH_2Cl_2$ ); IR (film)  $1650\text{ cm}^{-1}$ ;  $^1H$  NMR (400 MHz,  $CDCl_3$ )  $\delta$  0.94 (t,  $J = 7.4$  Hz, 3H), 1.30 (m, 1H), 1.46 (q,  $J = 7.5$  Hz, 2H), 1.66 (td,  $J = 13.8, 5.4$  Hz, 1H), 1.84 (m, 2H), 2.05 (m, 1H), 2.18 (ddd,  $J = 13.3, 5.3, 1.9$  Hz, 1H), 2.34 (ddd,  $J = 18.2, 5.4, 1.9$  Hz, 1H), 2.49 (ddd,  $J = 18.3, 14.2, 5.3$  Hz, 1H), 2.58-2.84 (m, 4H), 3.48 (td,  $J = 7.0, 0.7$  Hz, 2H);  $^{13}C$  NMR (100 MHz,  $CDCl_3$ )  $\delta$  9.6, 22.0, 26.0, 30.5, 30.6, 31.2, 32.6, 33.8, 36.8, 47.0, 128.6, 176.5, 198.7; CIMS  $m/z$  (relative intensity) 273 ( $MH_2^+$ , 100), 271 ( $M^+$ , 100), 191 (25); HRMS calcd for  $C_{13}H_{19}O$ : 271.0698, found: 271.0710.

**4-(2'-Chloroethyl)-7a*R*-ethyl-1,2,3,6,7,7a-hexahydroinden-5-one (16b).** Boron trichloride (1 M solution in  $CH_2Cl_2$ , 3.40 mL, 3.40 mmol) was added dropwise to a  $-78$  °C solution of benzyl ether **8** (0.60 g, 2.01 mmol) in  $CH_2Cl_2$  (6 mL). The reaction was then allowed to stir without external cooling for 45 min before it was poured over saturated aqueous  $NaHCO_3$ , extracted with  $CH_2Cl_2$ , dried over  $Na_2SO_4$ , and concentrated in vacuo. The resulting crude product residue was purified by chromatography (20%  $Et_2O$ /hexanes), to yield 0.38 g (84%) of the chloride **16b** ( $R_f = 0.30$ , 20%  $Et_2O$ /hexanes) as a light yellow oil.  $[\alpha]_D = -30.2$  ( $c$  4.1,  $CH_2Cl_2$ ); IR (film)  $1650\text{ cm}^{-1}$ ;  $^1H$  NMR (400 MHz,  $CDCl_3$ )  $\delta$  0.94 (t,  $J = 7.5$  Hz, 3H), 1.30 (td,  $J = 12.4, 10.0$  Hz, 1H), 1.47 (q,  $J = 7.4$  Hz, 2H), 1.66 (td,  $J = 13.8, 5.3$  Hz, 1H), 1.84 (m, 2H), 2.01 (dt,  $J = 12.5, 4.0$  Hz, 1H), 2.18 (ddd,  $J = 13.3, 5.3, 1.9$  Hz, 1H), 2.35 (ddd,  $J = 18.3, 5.4, 1.9$  Hz, 1H), 2.49 (ddd,  $J = 18.3, 14.2, 5.3$  Hz, 1H), 2.65 (m, 4H), 3.61 (td,  $J = 6.9, 2.3$  Hz, 2H);  $^{13}C$  NMR (100 MHz,  $CDCl_3$ )  $\delta$  9.6, 22.0, 26.0, 30.48, 30.55, 31.2, 33.8, 36.8, 44.0, 46.9, 127.8, 176.7, 198.8; CIMS  $m/z$  (relative intensity) 227 ( $MH^+$ , 90), 191 (50), 161 (15), 91 (15). Anal. calcd for  $C_{13}H_{19}ClO$ : C, 68.86; H, 8.45, found: C, 68.98; H, 8.50.

**7-(2'-Chloroethyl)-3a*S*-ethyl-3,3a,4,5-tetrahydro-2H-indene-1,6-dione (17).** A solution of chloride **16b** (0.70 g, 3.1 mmol) and isopropenyl acetate (12 mL) was treated with *p*-TsOH (0.30 g) and heated at reflux for 1.5 h. The reaction was then cooled to rt, diluted with  $Et_2O$ , washed successively with saturated  $NaHCO_3$  and brine, and dried over  $Na_2SO_4$ . The resulting solution was concentrated in vacuo to yield 0.83 g (100%) of dienol acetate as a light yellow oil.  $[\alpha]_D = +23.4$  ( $c$  2.3,  $CH_2Cl_2$ ); IR (film)  $1750\text{ cm}^{-1}$ ;  $^1H$  NMR (400 MHz,  $CDCl_3$ )  $\delta$  0.87 (t,  $J = 7.5$  Hz, 3H), 1.58-1.31 (m, 4H), 1.95 (dd,  $J = 12.9, 6.3$  Hz, 1H), 2.00 (dd,  $J = 12.6, 7.5$  Hz, 1H), 2.12 (m, 1H), 2.20 (s, 3H), 2.33 (m, 1H), 2.48 (m, 2H), 2.60 (m, 1H), 2.67 (ddd,  $J = 13.5, 9.8, 7.1$  Hz, 1H), 3.49 (m, 2H), 5.58 (s, 1H).

This sensitive material was directly dissolved in a mixture of acetone (20 mL), saturated aqueous NaHCO<sub>3</sub> (10 mL), and H<sub>2</sub>O (5 mL), and treated with 3.5 g of Oxone. After 30 min the reaction was poured over H<sub>2</sub>O and extracted with EtOAc. The combined organic layers were washed with brine, dried over Na<sub>2</sub>SO<sub>4</sub>, and concentrated in vacuo, and the resulting residue was purified by chromatography (50% Et<sub>2</sub>O/hexanes), to yield 0.60 g (80%) of the allylic alcohol (*R<sub>f</sub>* = 0.20, 50% Et<sub>2</sub>O/hexanes) as a clear oil.  $[\alpha]_D = -16.4$  (*c* 1.8, CH<sub>2</sub>Cl<sub>2</sub>); IR (film) 3400, 1650 cm<sup>-1</sup>; <sup>1</sup>H NMR (400 MHz, CDCl<sub>3</sub>)  $\delta$  0.92 (t, *J* = 7.4 Hz, 3H), 1.42 (m, 2H), 1.63 (m, 1H), 1.76 (m, 1H), 1.83 (m, 1H), 1.92 (m, 1H), 2.04 (m, 1H), 2.14 (m, 1H), 2.21 (m, 1H), 2.42 (m, 1H), 2.48 (m, 1H), 2.80 (m, 1H), 2.98 (m, 1H), 3.70 (m, 2H), 4.97 (d, *J* = 6.3 Hz, 1H); <sup>13</sup>C NMR (100 MHz, CDCl<sub>3</sub>)  $\delta$  9.8, 27.7, 30.4, 31.3, 33.6, 33.7, 33.9, 44.3, 46.6, 72.9, 130.5, 175.5, 199.9; CIMS *m/z* (relative intensity) 243 (MH<sup>+</sup>, 90), 207 (50), 180 (25).

A solution of allylic alcohol (0.67 g, 2.8 mmol) in CH<sub>2</sub>Cl<sub>2</sub> (30 mL), maintained at rt, was treated with PCC (1.2 g, 5.5 mmol) and stirred for 3 h. The reaction was then diluted with Et<sub>2</sub>O and filtered through a silica gel plug. The filtrate was concentrated in vacuo and the resulting crude product residue was purified by chromatography (30% Et<sub>2</sub>O/hexanes), to yield 0.45 g (68%) of **17** (*R<sub>f</sub>* = 0.20, 30% Et<sub>2</sub>O/hexanes) as a yellow solid: mp = 54-55 °C;  $[\alpha]_D = -211.6$  (*c* 1.4, CH<sub>2</sub>Cl<sub>2</sub>); IR (film) 1705, 1665 cm<sup>-1</sup>; <sup>1</sup>H NMR (400 MHz, CDCl<sub>3</sub>)  $\delta$  1.01 (t, *J* = 7.4 Hz, 3H), 1.57 (m, 3H), 1.86 (td, *J* = 13.6, 6.0 Hz, 1H), 2.25 (ddd, *J* = 13.0, 7.9, 2.3 Hz, 1H), 2.31 (ddd, *J* = 13.5, 5.1, 2.3 Hz, 1H), 2.41-2.62 (m, 4H), 3.13 (m, 1H), 3.29 (dt, *J* = 12.5, 7.2 Hz, 1H), 3.56 (m, 2H); <sup>13</sup>C NMR (100 MHz, CDCl<sub>3</sub>)  $\delta$  26.3, 27.7, 30.5, 32.5, 33.7, 37.0, 43.6, 44.3, 135.6, 156.6, 200.3, 209.5; CIMS *m/z* (relative intensity) 241 (MH<sup>+</sup>, 30), 240 (M<sup>+</sup>, 50), 211 (40), 175 (100).

**7-(2'-Chloroethyl)-3a*S*-ethyl-7a*R*-hexahydroindene-1,6-dione (18).** Concentrated HCl (12 M, 0.91 mL, 11.0 mmol) and sodium iodide (1.64 g, 11.0 mmol) were added to a solution of enedione **17** (0.33 g, 1.37 mmol) in acetone (50 mL) maintained at rt. After 15 min the reaction was diluted with Et<sub>2</sub>O and washed successively with 10% aqueous Na<sub>2</sub>S<sub>2</sub>O<sub>3</sub> (until the organic layer remained colorless), H<sub>2</sub>O, and brine. The resulting organic layer was dried over Na<sub>2</sub>SO<sub>4</sub> and concentrated in vacuo to give a crude product residue that was purified by chromatography (30% Et<sub>2</sub>O/hexanes), to yield 0.31 g (93%) of a ~1:1 diastereomeric mixture of **18** (*R<sub>f</sub>* = 0.15) as a clear oil. IR (film) 1725, 1700 cm<sup>-1</sup>; <sup>1</sup>H NMR (400 MHz, CDCl<sub>3</sub>)  $\delta$  0.91 (t, *J* = 7.4 Hz, 3H), 1.05 (t, *J* = 7.4 Hz, 3H), 1.35-1.42 (sextet, *J* = 7.4 Hz, 1H), 1.49-1.53 (sextet, *J* = 7.4 Hz, 1H), 1.55-1.65 (m, 1H), 1.70-1.80 (m, 2H), 1.83-2.10 (m, 9H), 2.05-2.10 (m, 1H), 2.10-2.20 (m, 1H), 2.20-2.35 (m, 4H), 2.35-2.47 (m, 4H), 2.65-2.75 (m, 2H), 2.83 (q, *J* = 6.5 Hz, 1H), 3.50-3.58 (m, 1H), 3.61-3.67 (m, 3H); CIMS *m/z* (relative intensity) 243 (MH<sup>+</sup>, 30), 207 (50), 180 (90); HRMS calcd for C<sub>13</sub>H<sub>19</sub>O<sub>2</sub> (M<sup>+</sup>+H): 207.1385, found: 207.1385.

**Cyclopropane (19).** A solution of **18** (0.31 g, 1.28 mmol) in THF (18 mL) was treated with 14 drops of DBU and stirred overnight at rt. After 18 h the reaction was diluted with Et<sub>2</sub>O, washed successively with 1M HCl and brine, dried over Na<sub>2</sub>SO<sub>4</sub>, and concentrated in vacuo. The resulting residue was purified by chromatography (30% Et<sub>2</sub>O/hexanes) to yield 0.20 g (76%) of **19** (*R<sub>f</sub>* = 0.10) as a clear oil.  $[\alpha]_D = -100$  (*c* 0.66,



CH<sub>2</sub>Cl<sub>2</sub>); IR (film) 1730, 1685 cm<sup>-1</sup>; <sup>1</sup>H NMR (400 MHz, CDCl<sub>3</sub>)  $\delta$  0.68 (ddd, *J* = 9.1, 7.1, 3.3 Hz, 1H), 0.94 (m, 1H), 1.02 (t, *J* = 7.5 Hz, 3H), 1.08 (ddd, *J* = 9.0, 7.2, 4.6 Hz, 1H), 1.60 (m, 1H), 1.69-1.93 (m, 6H), 2.01 (m, 1H), 2.24-2.45 (m, 4H); <sup>13</sup>C NMR (100 MHz, CDCl<sub>3</sub>)  $\delta$  8.6, 12.4, 20.7, 25.8, 29.3, 31.1, 31.11, 35.2, 36.2, 42.8, 61.3, 209.4, 217.3; CIMS *m/z* (relative intensity) 207 (MH<sup>+</sup>, 50), 150 (100).

**Cyclopropane (20).** To **16b** (0.277 g, 0.12 mmol) in THF (2 mL) was added DBU (0.036 g, 0.24 mmol) and the reaction mixture was heated under reflux for 5 h. After this time the reaction mixture was cooled to rt, diluted with H<sub>2</sub>O (5 mL) and extracted with Et<sub>2</sub>O (3 x 15 mL). The organic layer was dried over MgSO<sub>4</sub>, concentrated in vacuo and the resulting oil was purified by chromatography (10% EtOAc/hexanes) to afford 18 mg (78%) of **20** (*R<sub>f</sub>* = 0.86, 20% EtOAc/hexanes) as a clear oil. IR (neat) 1693 cm<sup>-1</sup>; <sup>1</sup>H NMR (400 MHz, CDCl<sub>3</sub>)  $\delta$  0.89 (t, *J* = 7.4 Hz, 3H), 0.89 (buried m, 1H), 1.23 (m, 1H), 1.36 (m, 1H), 1.54-1.62 (m, 3H), 1.66-1.78 (m, 2H), 2.01-2.06 (m, 2H), 2.28 (m, 2H), 2.44 (m, 2H), 5.06 (t, *J* = 2.4 Hz, 1H); <sup>13</sup>C NMR (100 MHz, CDCl<sub>3</sub>)  $\delta$  8.9, 16.8, 27.1, 28.5, 29.5, 30.8, 33.3, 36.1, 36.3, 49.8, 117.7, 149.0, 210.4; CIMS *m/z* (relative intensity) 191 (MH<sup>+</sup>, 100), 162 (42), 91 (11); HRMS calcd for C<sub>13</sub>H<sub>19</sub>O: 191.1436, found: 191.1460.

**4-(2'-Azidoethyl)-7a*R*-ethyl-1,2,3,6,7,7a-hexahydroinden-5-one (21).** Cyclopropane **20** (0.030 g, 0.16 mmol), TMSN<sub>3</sub> (0.168 mL, 0.64 mmol) and Bu<sub>4</sub>NF (0.64 mL, 0.64 mmol) were combined and heated at 66 °C for 25 h. The reaction mixture was cooled to rt and quenched with a saturated aqueous solution of NaHCO<sub>3</sub> (5 mL). The aqueous layer was extracted with Et<sub>2</sub>O (3 x 25 mL), and the organic layer washed with a saturated solution of NaHCO<sub>3</sub> (5 mL), and H<sub>2</sub>O (5 mL). The organic layer was dried over MgSO<sub>4</sub>, concentrated in vacuo and the resulting oil was purified by chromatography (10% EtOAc/hexanes) to afford 30 mg (81%) of **21** (*R<sub>f</sub>* = 0.59, 20% EtOAc/hexanes) as a clear oil. IR (neat) 2968, 2872, 2095, 1666 cm<sup>-1</sup>; <sup>1</sup>H NMR (400 MHz, CDCl<sub>3</sub>)  $\delta$  0.91 (t, *J* = 7.4 Hz, 3H), 1.22-1.32 (m, 1H), 1.44 (q, *J* = 7.4 Hz, 2H), 1.64 (dt, *J* = 13.8, 9.6 Hz, 1H), 1.80-1.88 (m, 2H), 1.97-2.04 (m, 1H), 2.17 (ddd, *J* = 1.6, 5.1, 13.3 Hz, 1H), 2.33 (ddd, *J* = 1.6, 5.2, 12.0 Hz, 1H), 2.40-2.58 (m, 3H), 2.64 (q, *J* = 8.3 Hz, 2H), 3.25-3.40 (m, 2H); <sup>13</sup>C NMR (100 MHz, CDCl<sub>3</sub>)  $\delta$  9.0, 21.4, 25.3, 26.7, 29.8, 30.6, 33.3, 36.1, 46.4, 50.1, 127.2, 175.8, 198.3; CIMS *m/z* (relative intensity) 234 (MH<sup>+</sup>, 100), 206 (54), 149 (16); HRMS calcd for C<sub>13</sub>H<sub>19</sub>N<sub>3</sub>O: 234.1606, found: 234.1594.

**4-(2'-Azidoethyl)-7a*R*-ethyl-3*S*-hydroxy-1,2,3,6,7,7a-hexahydroinden-5-one (22).** Enone **21** (0.019 g, 0.08 mmol) and *p*-TsOH (0.003 g, 0.016 mmol) were placed in isopropenyl acetate (5 mL) and the reaction mixture heated at 105 °C for 1.5 h. After this time the reaction mixture was cooled to room temperature and diluted with Et<sub>2</sub>O (50 mL). The organic layer was washed with a saturated aqueous solution of NaHCO<sub>3</sub> (10 mL), H<sub>2</sub>O (10 mL), dried over MgSO<sub>4</sub>, concentrated to a light brown oil that was used in the next step without purification.

The crude dienol acetate was dissolved in acetone (3 mL), followed by the addition of H<sub>2</sub>O (1 mL), a saturated aqueous solution of NaHCO<sub>3</sub> (1 mL) and Oxone (0.40 g) and the resulting reaction mixture was stirred at rt for 45 min. The reaction mixture was diluted with H<sub>2</sub>O (5 mL) and the aqueous layer was extracted with EtOAc (2 x 20

mL). The organic layer was washed with brine, dried over MgSO<sub>4</sub>, concentrated, and purified by chromatography (50% EtOAc/hexanes) to afford 13 mg of **32** (65%) as a clear oil ( $R_f = 0.28$ , 20% EtOAc/hexanes). IR (neat) 3432, 2942, 2103, 1658 cm<sup>-1</sup>; <sup>1</sup>H NMR (400 MHz, CDCl<sub>3</sub>)  $\delta$  0.90 (t,  $J = 7.4$  Hz, 3H), 1.34-1.40 (m, 2H), 1.61-1.75 (m, 2H), 1.77-1.91 (m, 2H), 2.00-2.08 (m, 2H), 2.20 (ddd,  $J = 2.0, 5.0, 13.3$  Hz, 1H), 2.38-2.53 (m, 3H), 2.77 (td,  $J = 4.3, 13.8$  Hz, 1H), 3.07 (br s, 1H), 3.48-3.57 (m, 2H), 4.84 (d,  $J = 6.0$  Hz, 1H); <sup>13</sup>C NMR (100 MHz, CDCl<sub>3</sub>)  $\delta$  9.4, 26.9, 27.2, 30.7, 32.8, 33.1, 33.5, 46.2, 50.0, 71.8, 129.5, 175.8, 199.4; CIMS  $m/z$  (relative intensity) 250 (MH<sup>+</sup>, 27), 222 (29), 204 (100); HRMS calcd for C<sub>13</sub>H<sub>20</sub>O<sub>2</sub>N<sub>3</sub>: 250.1555, found: 250.1567.

**5aS-Ethyl-8aS-decahydro-3-oxa-indacen-8-one (24)**. NaBH<sub>4</sub> (0.49 g, 13.0 mmol) was added to a solution of **18** (4.32 mmol) in MeOH (25 mL) at 0 °C. After stirring the reaction mixture for 5 min it was allowed to warm to rt, stirred for an additional 20 min, quenched with acetone (2 mL), and poured into H<sub>2</sub>O (50 mL). The aqueous layer was extracted with Et<sub>2</sub>O (2 x 100 mL) and the organic layer was washed with H<sub>2</sub>O (50 mL), dried over MgSO<sub>4</sub>, and concentrated to **23** which was a thick oil that was used in the next step without purification.

NaN<sub>3</sub> (2.45 g, 37.7 mmol) was added to crude **23** (0.93 g, 3.77 mmol) in DMF (30 mL), and the reaction mixture heated at 78 °C for 17 h. The reaction was allowed to cool to rt and poured into H<sub>2</sub>O (100 mL) and the aqueous layer was extracted with Et<sub>2</sub>O (3 x 100 mL). The organic layer was washed with brine, dried over MgSO<sub>4</sub>, and concentrated to afford 0.87 g of a clear oil that was reacted with PCC (2.97 g, 13.7 mmol). After stirring for 2 h at rt the reaction mixture was treated with silica gel (2 g) and diluted with Et<sub>2</sub>O (100 mL). The reaction mixture was then filtered through a pad of silica gel and the organic layer was concentrated to a pale yellow oil. The crude product was purified by chromatography (30% EtOAc/hexanes) to afford **7** and **24** (4:1 mixture). For **24**: IR (neat) 2922, 1727 cm<sup>-1</sup>; <sup>1</sup>H NMR (400 MHz, CDCl<sub>3</sub>)  $\delta$  0.85-0.95 (m, 3H), 1.15-2.15 (m, 8H), 2.22-2.33 (m, 3H), 2.45-2.52 (m, 1H), 2.72-2.80 (m, 1H), 3.02-3.20 (m, 1H), 3.70-3.80 (m, 1H), 3.85-4.00 (m, 2H); CIMS  $m/z$  (relative intensity) 209 (MH<sup>+</sup>, 95), 191 (100).

## References

- (1) Parker, K. A.; Iqbal, T. *J. Org. Chem.* **1987**, *52*, 4369-4377.
- (2) Bernady, K. F.; Poletto, J. F.; Nocera, J.; Mirando, P.; Schaub, R. E.; Weiss, M. J. *J. Org. Chem.* **1980**, *45*, 4702-4715.
- (3) Yadav, J. S.; Prahlad, V.; Muralidhar, B. *Synth. Commun.* **1997**, *27*, 3415-3418.

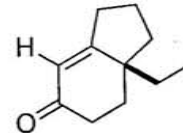

9

Current Data Parameters

NAME raj-i-enone  
EXPNO 1  
PROCNO 1

F2 - Acquisition Parameters

Date\_ 1000203  
Time 14.54  
INSTRUM drx400  
PROBHD 5 mm Multinu  
PULPROG zg30  
TD 32768  
SOLVENT CDCl3  
NS 16  
DS 2  
SWH 4789.272 Hz  
FIDRES 0.146157 Hz  
AQ 3.4210291 sec  
RG 32  
DN 104.400 usec  
DE 4.50 usec  
TE 300.0 K  
D1 1.00000000 sec  
P1 7.70 usec  
DE 4.50 usec  
SF01 400.1320007 MHz  
NUC1 1H  
PL1 -6.00 dB

F2 - Processing parameters

SI 16384  
SF 400.1299811 MHz  
WDW EM  
SSB 0  
LB 0.30 Hz  
GB 0  
PC 1.00

1D NMR plot parameters

CX 20.00 cm  
F1P 10.110 ppm  
F1 4045.14 Hz  
F2P -0.319 ppm  
F2 -127.47 Hz  
PPMCM 0.52141 ppm/cm  
HZCM 208.63042 Hz/cm

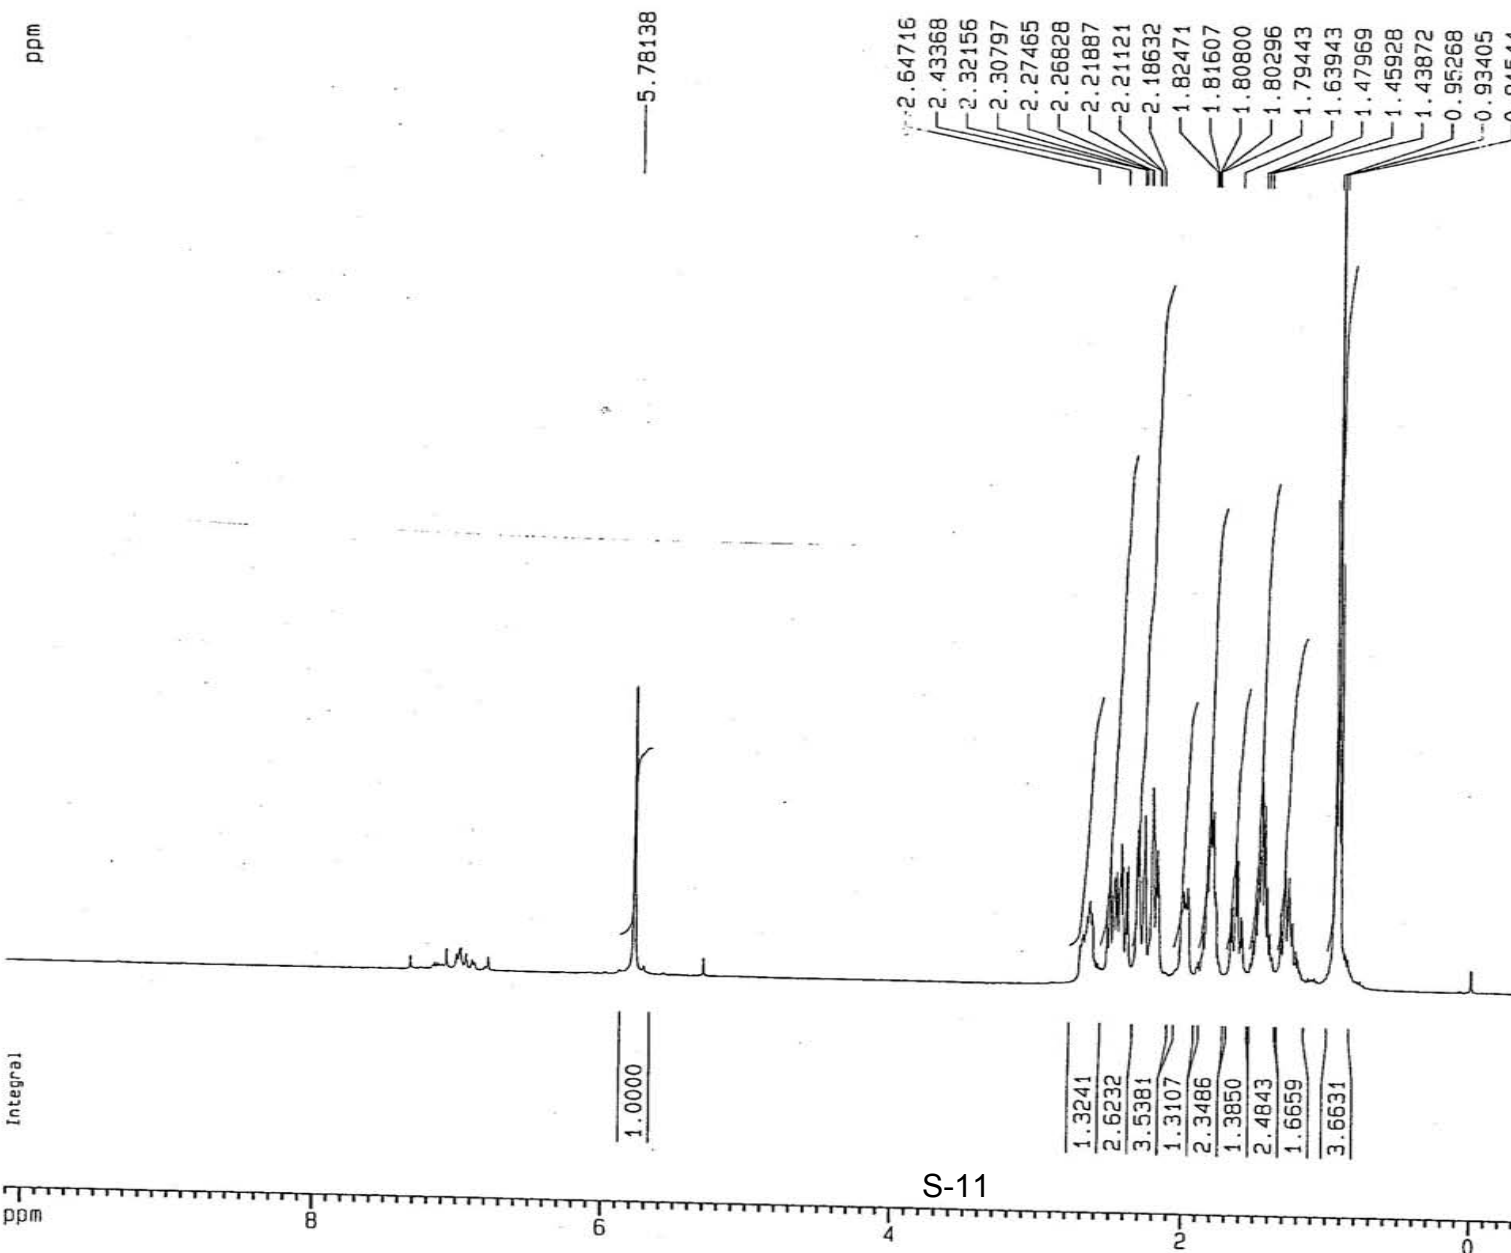

S-11

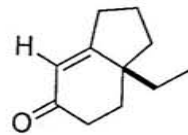

9

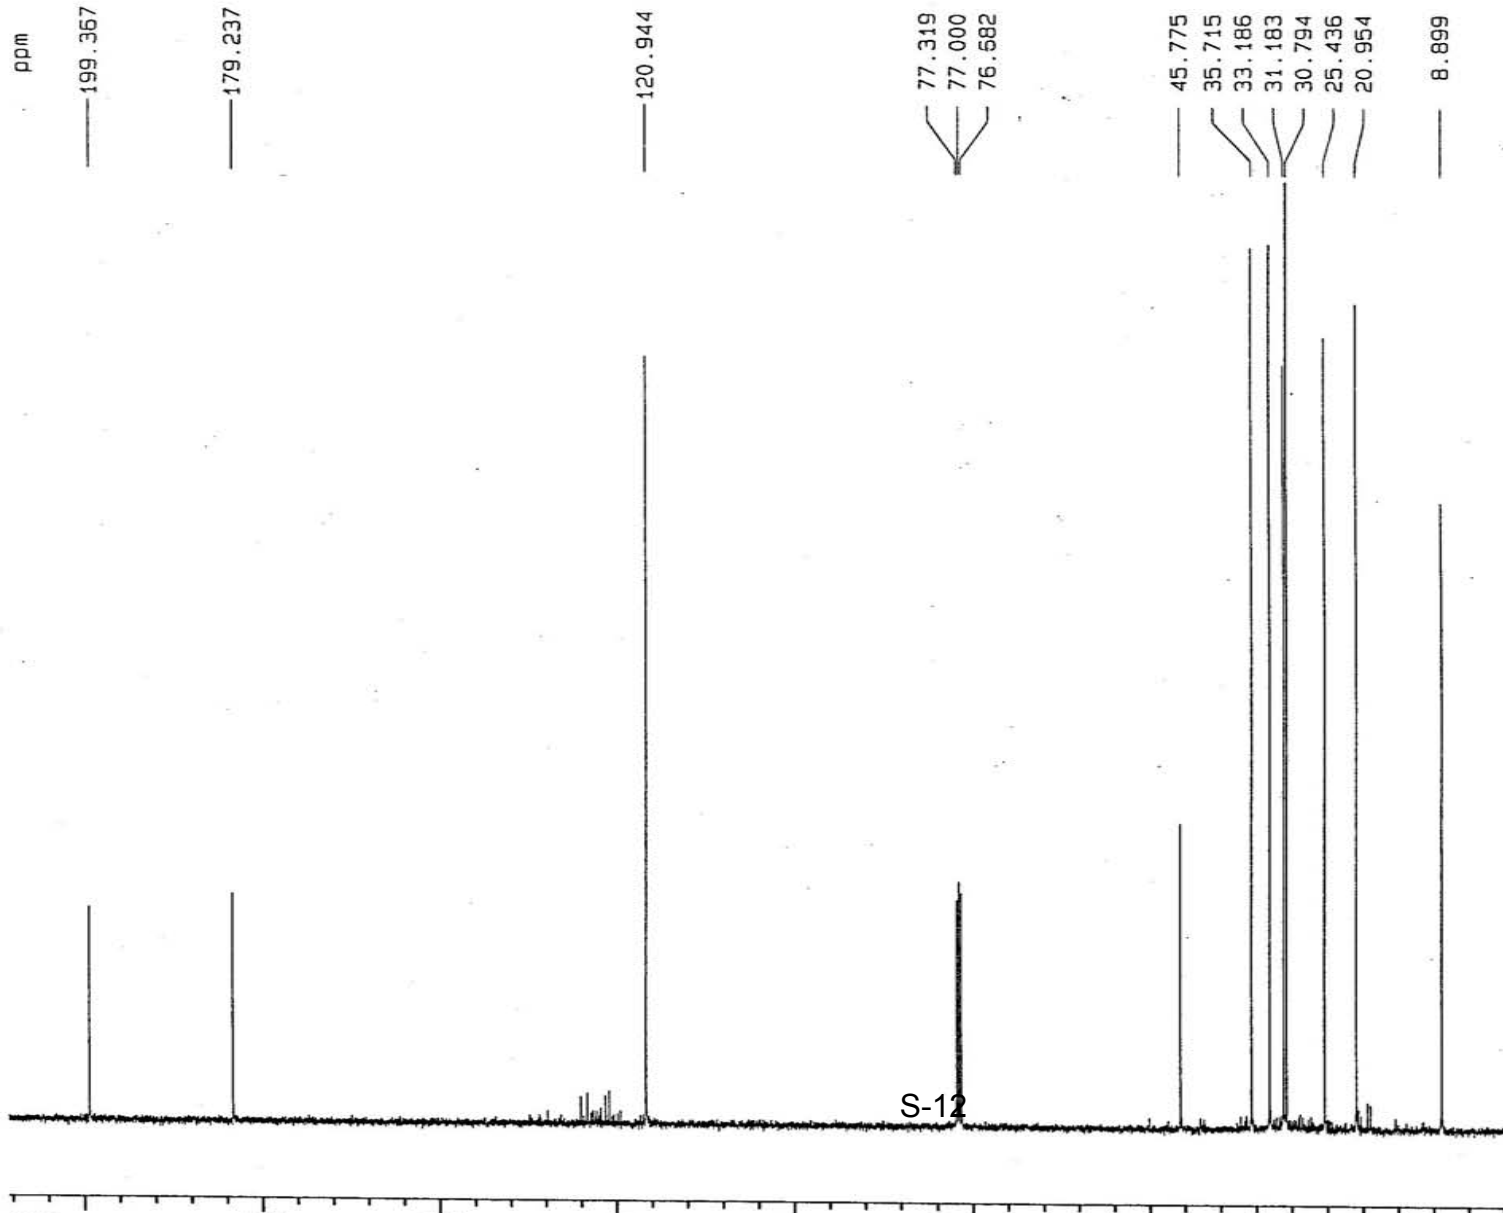

Current Data Parameters  
 NAME raj-1-enone  
 EXPNO 2  
 PROCNO 1

F2 - Acquisition Parameters  
 Date\_ 1000203  
 Time 15.47  
 INSTRUM drx400  
 PROBHD 5 mm Multinu  
 PULPROG zgpg30  
 TD 65536  
 SOLVENT CDC13  
 NS 543  
 DS 2  
 SWH 23148.148 Hz  
 FIDRES 0.353213 Hz  
 AQ 1.4156276 sec  
 RG 1024  
 DW 21.600 usec  
 DE 4.50 usec  
 TE 300.0 K  
 d11 0.0300000 sec  
 d12 0.0000200 sec  
 PL13 18.00 dB  
 D1 0.0500000 sec  
 CPDPRG2 waltz16  
 PCPD2 100.00 usec  
 SF02 400.1316005 MHz  
 NUC2 1H  
 PL2 -6.00 dB  
 PL12 18.00 dB  
 P1 6.90 usec  
 DE 4.50 usec  
 SF01 100.6232933 MHz  
 NUC1 13C  
 PL1 -6.00 dB

F2 - Processing parameters  
 SI 32768  
 SF 100.6127876 MHz  
 WDW EM  
 SSB 0  
 LB 1.00 Hz  
 GB 0  
 PC 1.40

1D NMR plot parameters  
 CX 20.00 cm  
 F1P 210.588 ppm  
 F1 21187.86 Hz  
 F2P -1.104 ppm  
 F2 -111.04 Hz

S-12

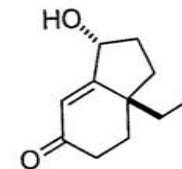

NAME 2-ethyl-2-(hydroxymethyl)cyclohex-2-en-1-one  
 EXPNO 1  
 PROCNO 1

F2 - Acquisition Parameters

Date\_ 1000223  
 Time 11.35  
 INSTRUM drx400  
 PROBHD 5 mm Multinu  
 PULPROG zg30  
 TD 32768  
 SOLVENT CDCl3  
 NS 16  
 DS 2  
 SWH 4789.272 Hz  
 FIDRES 0.146157 Hz  
 AQ 3.4210291 sec  
 RG 256  
 DW 104.400 usec  
 DE 4.50 usec  
 TE 300.0 K  
 D1 1.00000000 sec  
 P1 7.70 usec  
 DE 4.50 usec  
 SF01 400.1320007 MHz  
 NUC1 1H  
 PL1 -6.00 dB

F2 - Processing parameters

SI 16384  
 SF 400.1300065 MHz  
 WDW EM  
 SSB 0  
 LB 0.30 Hz  
 GB 0  
 PC 1.00

1D NMR plot parameters

CX 20.00 cm  
 F1P 10.192 ppm  
 F1 4078.22 Hz  
 F2P -0.348 ppm  
 F2 -139.40 Hz  
 PPMCM 0.52703 ppm/cm  
 HZCM 210.88100 Hz/cm

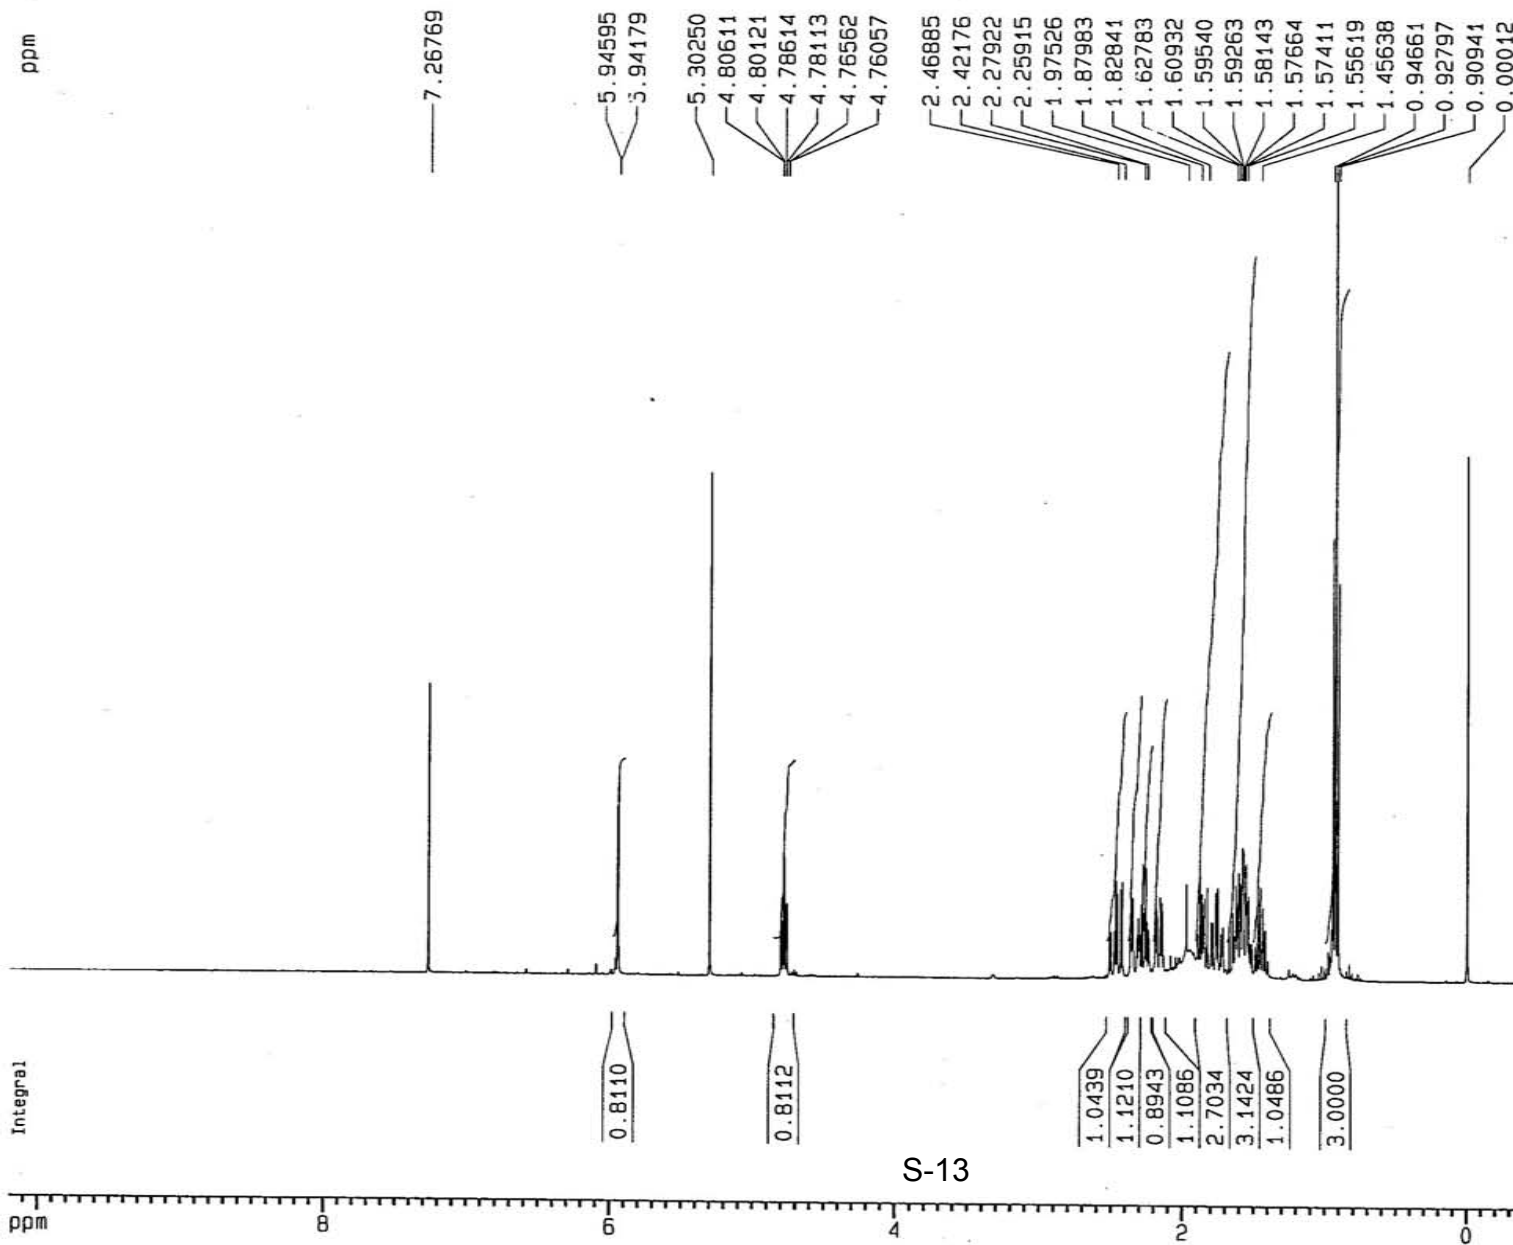

S-13

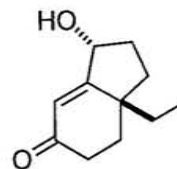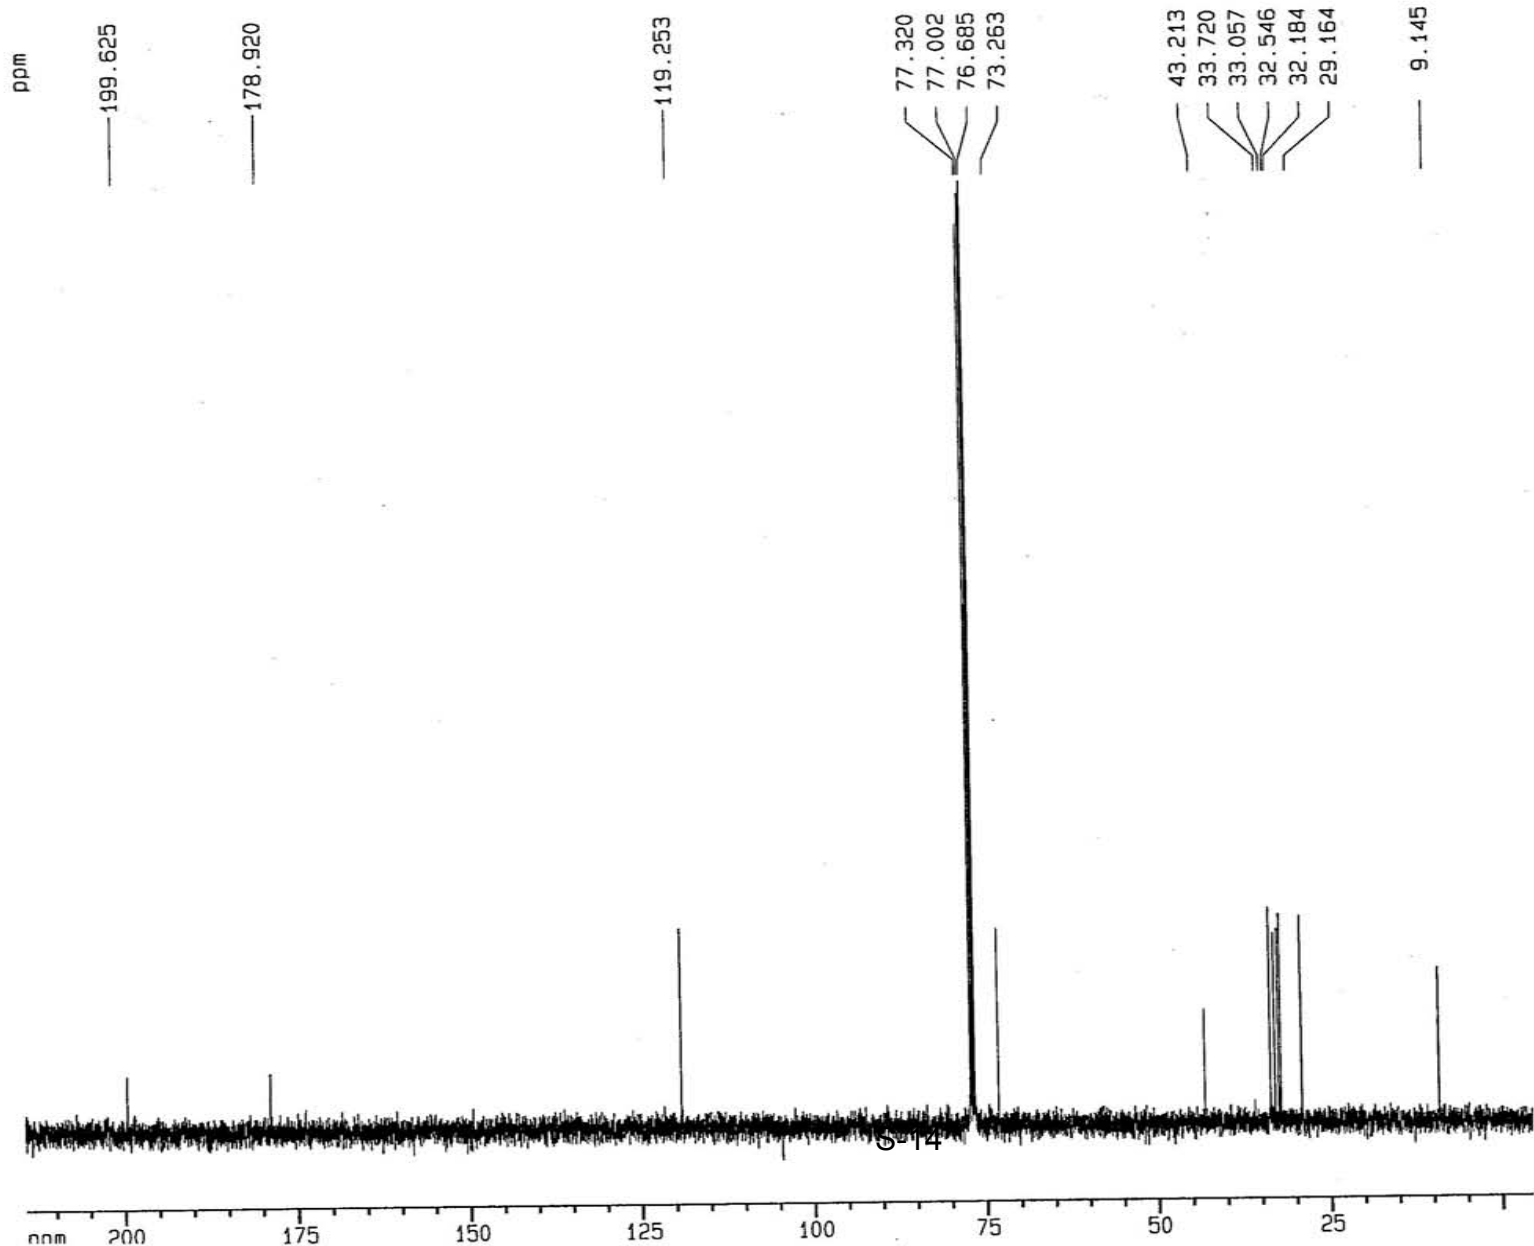

Current Data Parameters  
 NAME raj-enonealc  
 EXPNO 2  
 PROCNO 1

F2 - Acquisition Parameters  
 Date 1000223  
 Time 11.42  
 INSTRUM drx400  
 PROBHD 5 mm Multinu  
 PULPROG zgpg30  
 TD 65536  
 SOLVENT CDCl3  
 NS 568  
 DS 2  
 SWH 23148.148 Hz  
 FIDRES 0.353213 Hz  
 AQ 1.4156276 sec  
 RG 4096  
 DW 21.600 usec  
 DE 4.50 usec  
 TE 300.0 K  
 J11 0.0300000 sec  
 J12 0.0000200 sec  
 PL13 18.00 dB  
 D1 0.0500000 sec  
 CPDPRG2 waltz16  
 PCPD2 100.00 usec  
 SF02 400.1316005 MHz  
 NUC2 1H  
 PL2 -6.00 dB  
 PL12 18.00 dB  
 P1 6.90 usec  
 DE 4.50 usec  
 SF01 100.6232933 MHz  
 NUC1 13C  
 PL1 -6.00 dB

F2 - Processing parameters  
 SI 32768  
 SF 100.6127713 MHz  
 WDW EM  
 SSB 0  
 LB 1.00 Hz  
 GB 0  
 PC 1.40

1D NMR plot parameters  
 CX 20.00 cm  
 F1P 214.426 ppm  
 F1 21573.96 Hz  
 F2P -4.402 ppm  
 F2 -442.89 Hz  
 PPMCM 10.94138 ppm/  
 HZCM 1100.84241 Hz/c

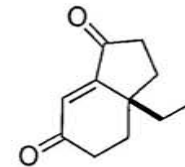

15

Current Date: 10/00/21  
 NAME: raj-1-157-prdt  
 EXPNO: 1  
 PROCNO: 1

F2 - Acquisition Parameters

Date\_: 1000218  
 Time: 17.05  
 INSTRUM: drx400  
 PROBHD: 5 mm Multinu  
 PULPROG: zg30  
 TD: 32768  
 SOLVENT: CDCl3  
 NS: 16  
 DS: 2  
 SWH: 4789.272 Hz  
 FIDRES: 0.146157 Hz  
 AQ: 3.4210291 sec  
 RG: 128  
 DW: 104.400 usec  
 DE: 4.50 usec  
 TE: 300.0 K  
 D1: 1.00000000 sec  
 P1: 7.70 usec  
 DE: 4.50 usec  
 SFO1: 400.1320007 MHz  
 NUC1: 1H  
 PL1: -6.00 dB

F2 - Processing parameters

SI: 16384  
 SF: 400.1300024 MHz  
 WDW: EM  
 SSB: 0  
 LB: 0.30 Hz  
 GB: 0  
 PC: 1.00

1D NMR plot parameters

CX: 20.00 cm  
 F1P: 10.024 ppm  
 F1: 4011.07 Hz  
 F2P: -0.178 ppm  
 F2: -71.12 Hz  
 PPMCM: 0.51011 ppm/cm  
 HZCM: 204.10973 Hz/cm

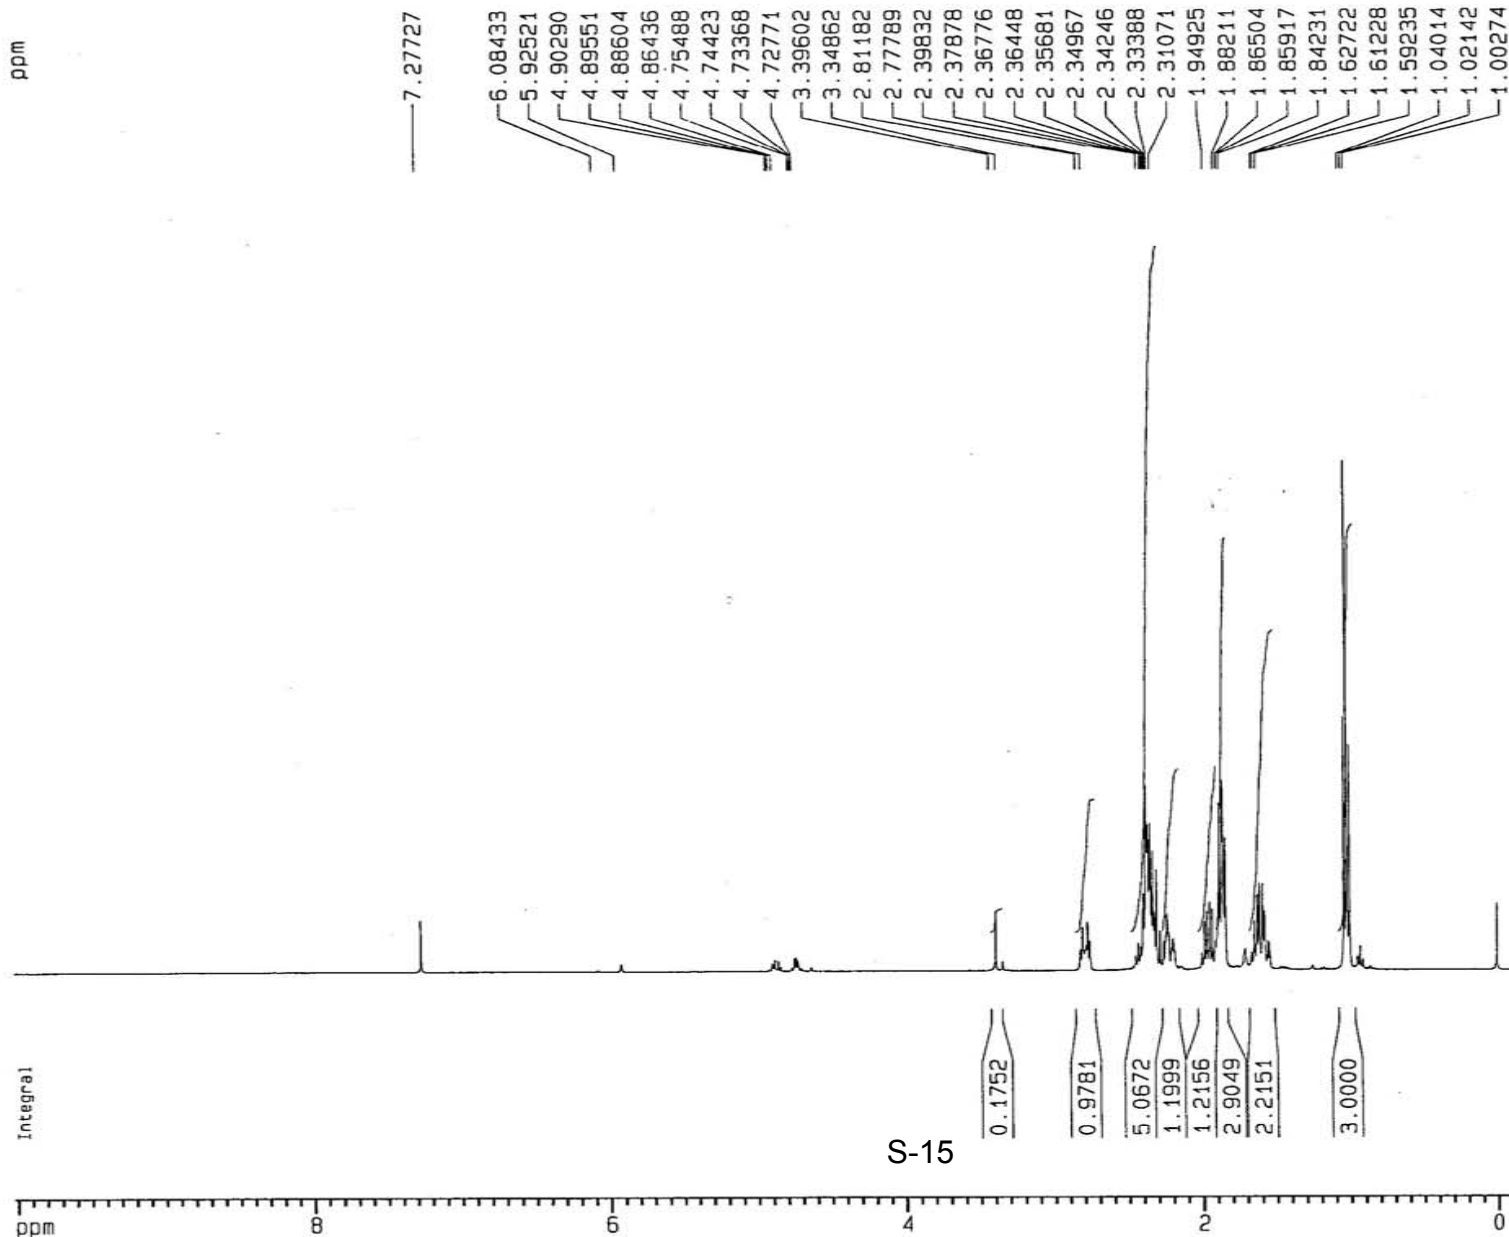

S-15

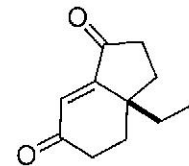

15

Current Data Parameters  
 NAME raj-1-157-prot  
 EXPNO 2  
 PROCNO 1

F2 - Acquisition Parameters  
 Date\_ 1000218  
 Time 17.36  
 INSTRUM drx400  
 PROBHD 5 mm Multinu  
 PULPROG zgpg30  
 TD 65536  
 SOLVENT CDCl3  
 NS 1024  
 OS 2  
 SWH 23148.148 Hz  
 FIDRES 0.353213 Hz  
 AQ 1.4156276 sec  
 RG 1024  
 DW 21.600 usec  
 DE 4.50 usec  
 TE 300.0 K  
 d11 0.0300000 sec  
 d12 0.0000200 sec  
 PL13 18.00 dB  
 D1 0.05000000 sec  
 CPDPRG2 waltz16  
 PCPD2 100.00 usec  
 SF02 400.1316005 MHz  
 NUC2 1H  
 PL2 -5.00 dB  
 PL12 18.00 dB  
 P1 6.90 usec  
 DE 4.50 usec  
 SF01 100.6232933 MHz  
 NUC1 13C  
 PL1 -6.00 dB

F2 - Processing parameters  
 SI 32768  
 SF 100.6127741 MHz  
 WDN EM  
 SSB 0  
 LB 1.00 Hz  
 GB 0  
 PC 1.40

1D NMR plot parameters  
 CX 20.00 cm  
 F1P 219.587 ppm  
 F1 22093.27 Hz  
 F2P -10.485 ppm  
 F2 -1054.88 Hz  
 PPMCM 11.50358 ppm/cm  
 HZCM 1157.40747 Hz/cm

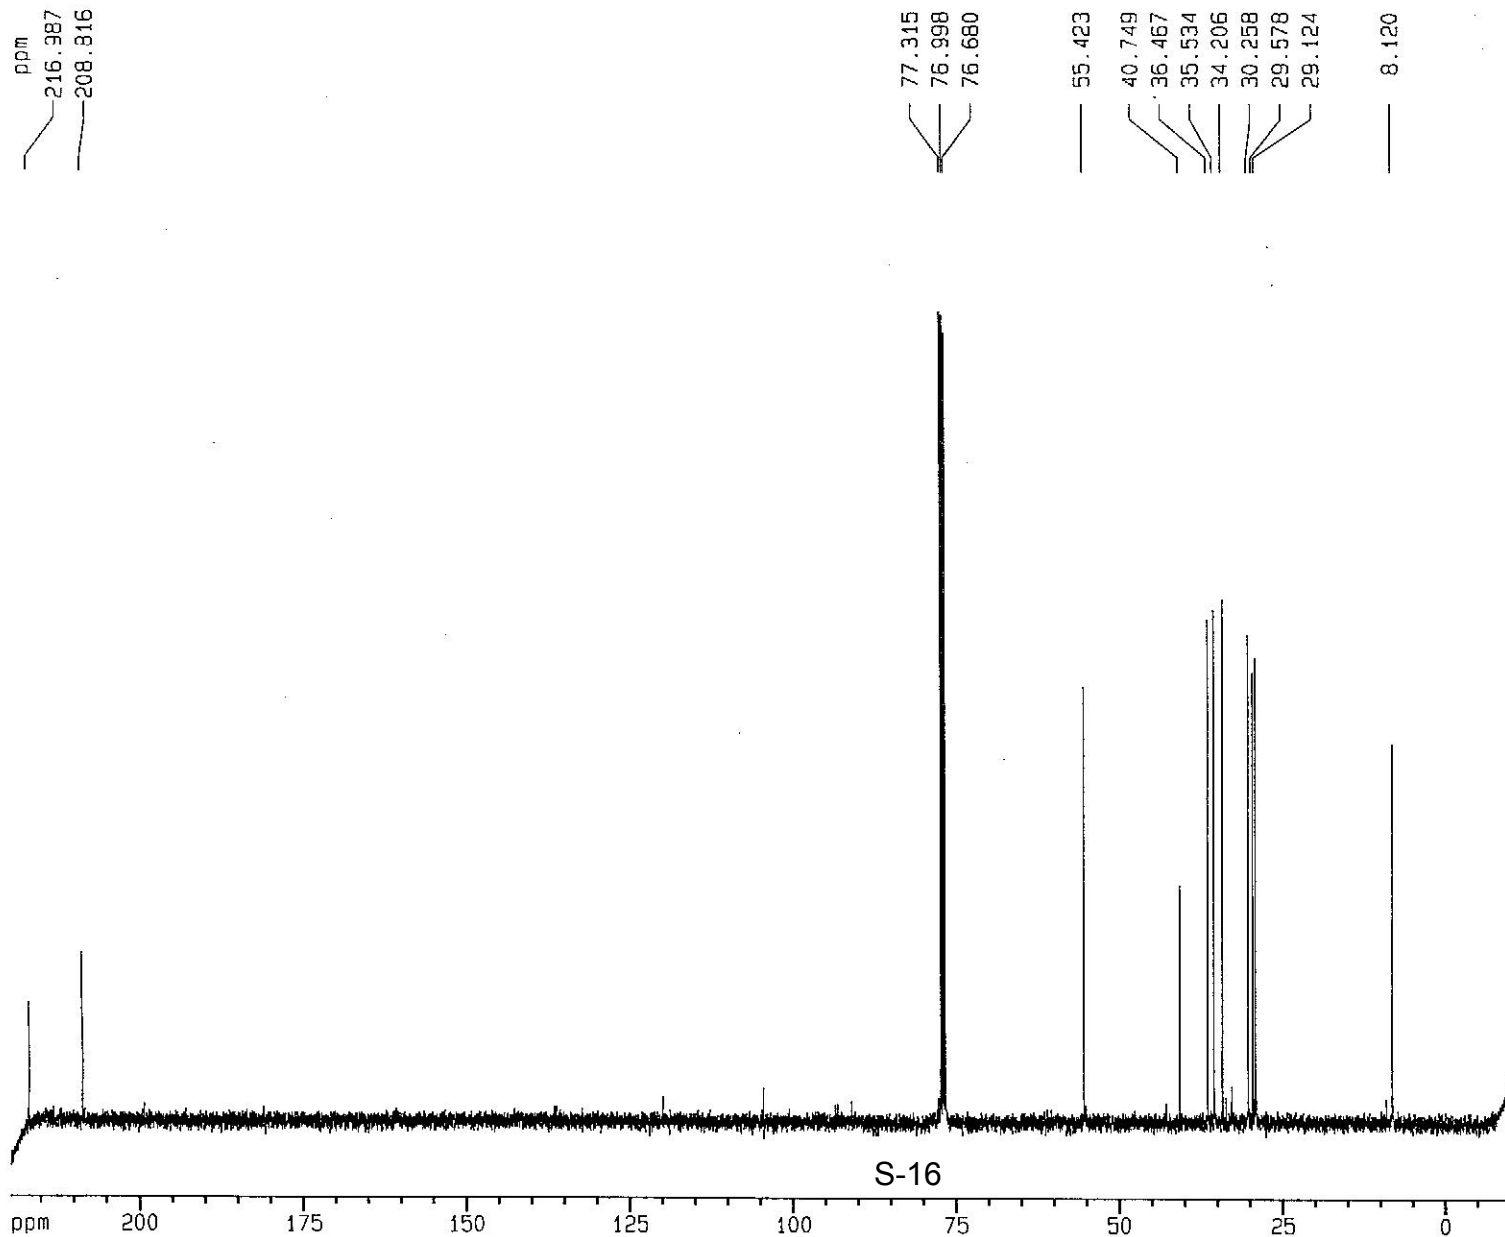



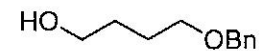

Current Data Parameters  
NAME ks3.100  
EXPNO 1  
PROCNO 1

F2 - Acquisition Parameters  
Date\_ 961226  
Time 9.16  
INSTRUM drx400  
PROBHD 5 mm Multinu  
PULPROG zg30  
TD 32768  
SOLVENT CDCl3  
NS 16  
DS 2  
SWH 4789.272 Hz  
FIDRES 0.146157 Hz  
AQ 3.4210291 sec  
RG 64  
DW 104.400 usec  
DE 4.50 usec  
TE 300.0 K  
D1 1.0000000 sec  
P1 7.70 usec  
DE 4.50 usec  
SF01 400.1320007 MHz  
NUC1 1H  
PL1 -6.00 dB

F2 - Processing parameters  
SI 16384  
SF 400.1300000 MHz  
WDW EM  
SSB 0  
LB 0.30 Hz  
GB 0  
PC 1.00

1D NMR plot parameters  
CX 20.00 cm  
F1P 9.500 ppm  
F1 3801.24 Hz  
F2P -0.500 ppm  
F2 -200.07 Hz  
PPMCM 0.50000 ppm/cm  
HZCM 200.06500 Hz/cm

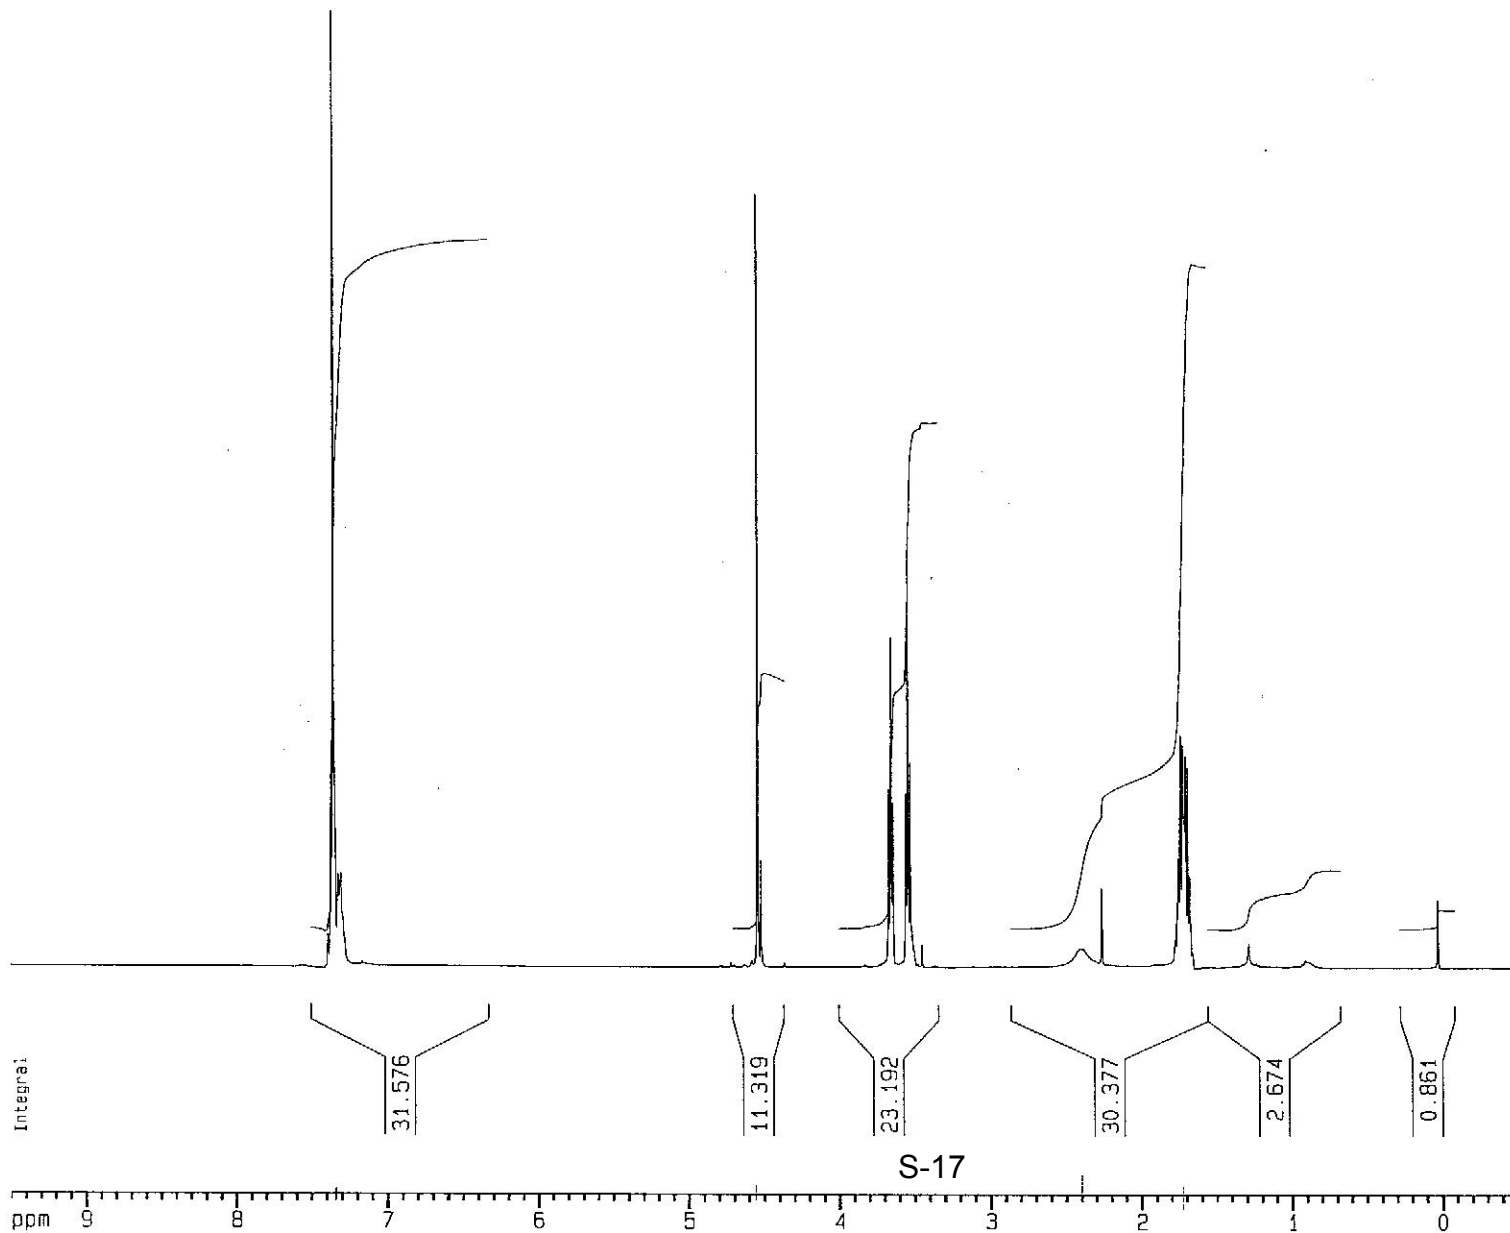

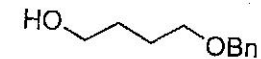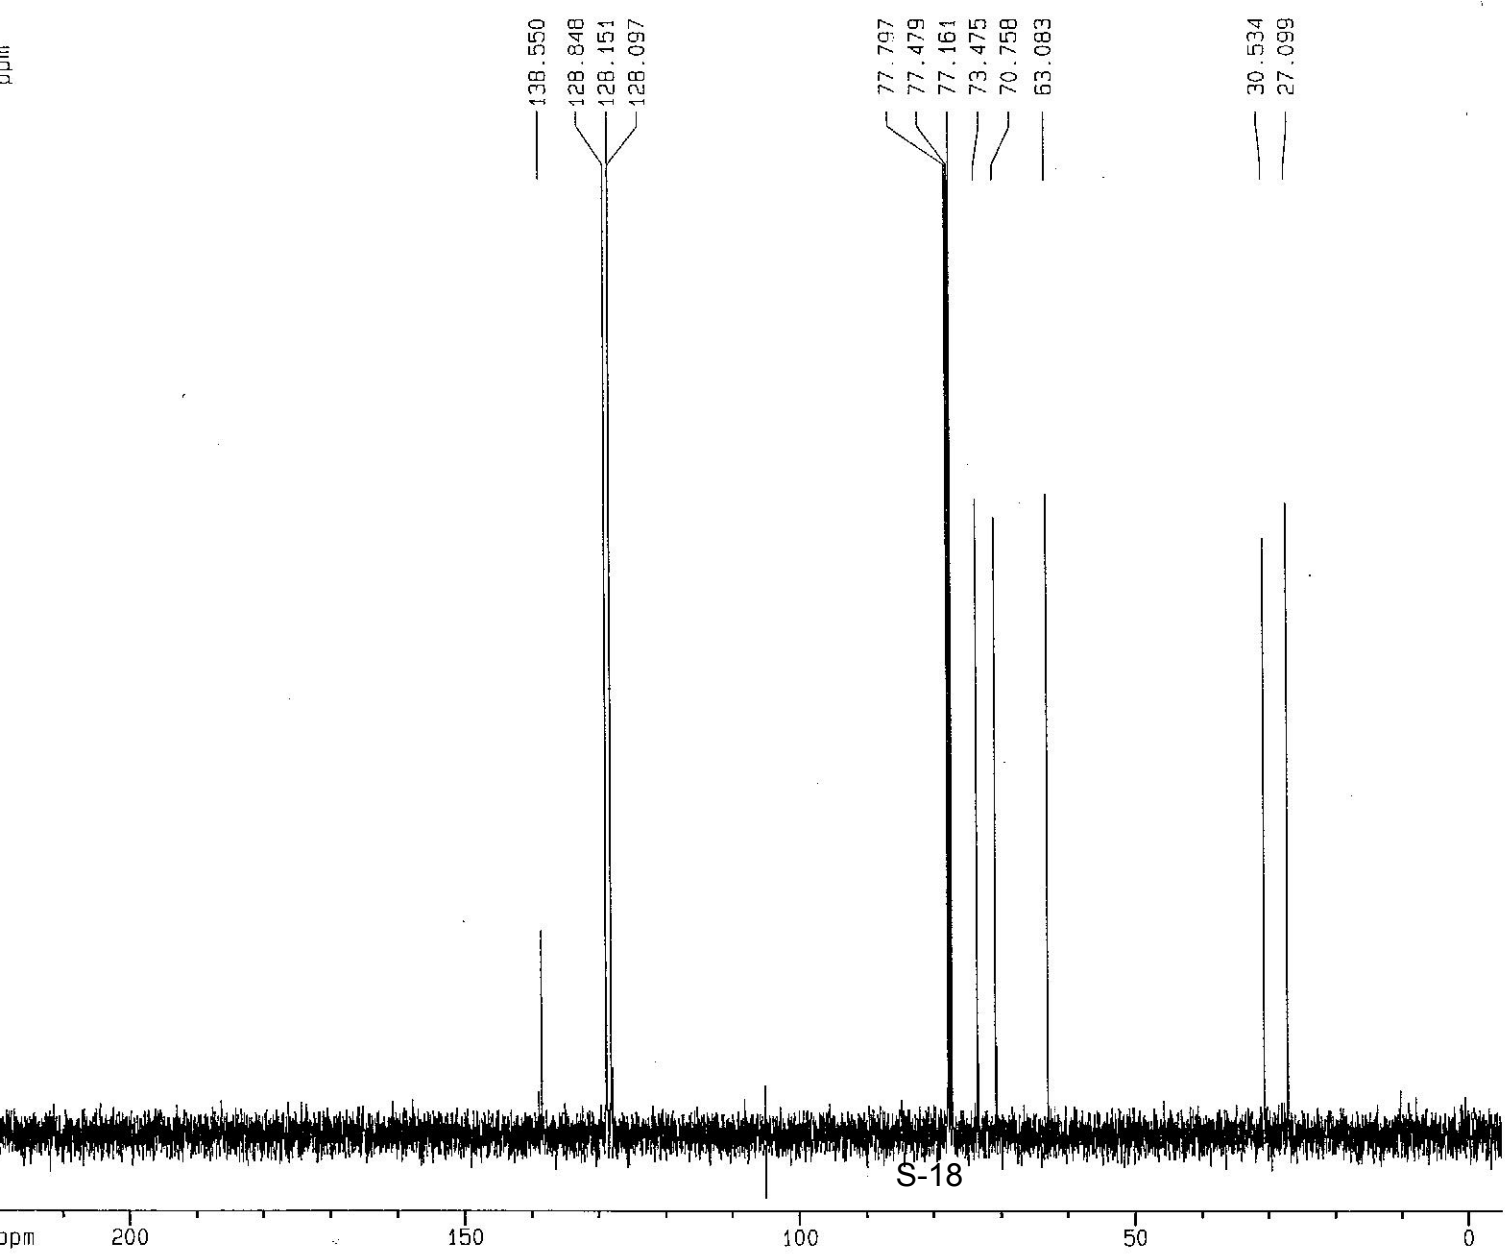

Current Data Parameters  
 NAME ks3.100  
 EXPNO 2  
 PROCNO 1

F2 - Acquisition Parameters  
 Date\_ 961226  
 Time 9.26  
 INSTRUM drx400  
 PROBHD 5 mm Multinu  
 PULPROG zgpg30  
 TD 65536  
 SOLVENT CDCl3  
 NS 256  
 DS 2  
 SWH 23148.148 Hz  
 FIDRES 0.353213 Hz  
 AQ 1.4156276 sec  
 RG 32768  
 DW 21.600 usec  
 DE 4.50 usec  
 TE 300.0 K  
 d11 0.0300000 sec  
 d12 0.0000200 sec  
 PL13 18.00 dB  
 D1 0.05000000 sec  
 CPDPRG2 waltz16  
 PCPD2 100.00 usec  
 SFO2 400.1316005 MHz  
 NUC2 1H  
 PL2 -6.00 dB  
 PL12 18.00 dB  
 P1 6.90 usec  
 DE 4.50 usec  
 SFO1 100.6232933 MHz  
 NUC1 13C  
 PL1 -6.00 dB

F2 - Processing parameters  
 SI 32768  
 SF 100.6127290 MHz  
 WDW EM  
 SSB 0  
 LB 1.00 Hz  
 GB 0  
 PC 4.00

1D NMR plot parameters  
 CX 20.00 cm  
 F1P 220.000 ppm  
 F1 22134.80 Hz  
 F2P -5.000 ppm  
 F2 -503.07 Hz  
 PPMCM 11.25000 ppm/cm  
 HZCM 1131.89319 Hz/cm

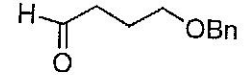

KS2.106

EXP1 PULSE SEQUENCE: STD1H  
DATE 06-24-96  
SOLVENT CDCL3  
FILE H

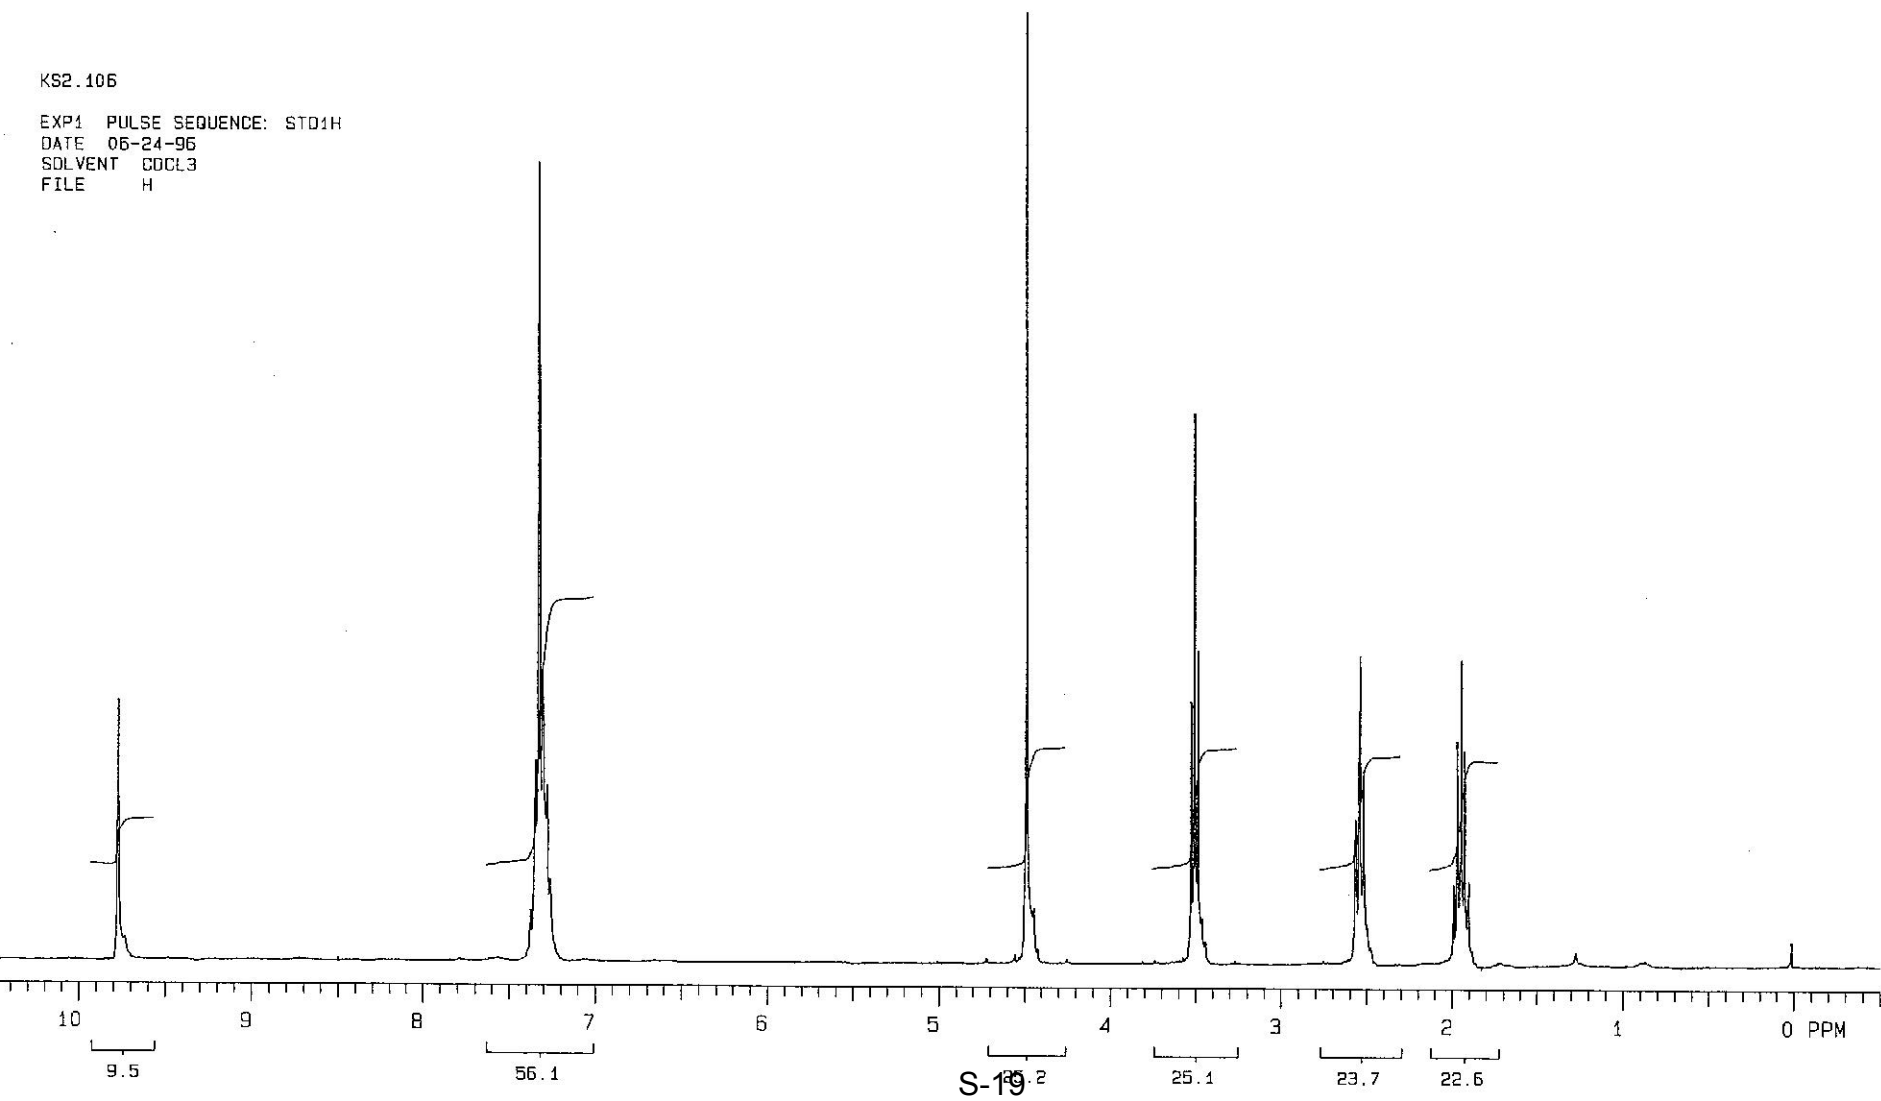

S-19

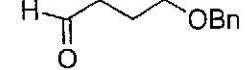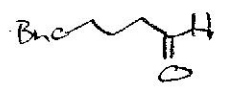

KS2.106

EXP1 PULSE SEQUENCE: STD13C  
DATE 06-24-96  
SOLVENT CDCL3  
FILE C

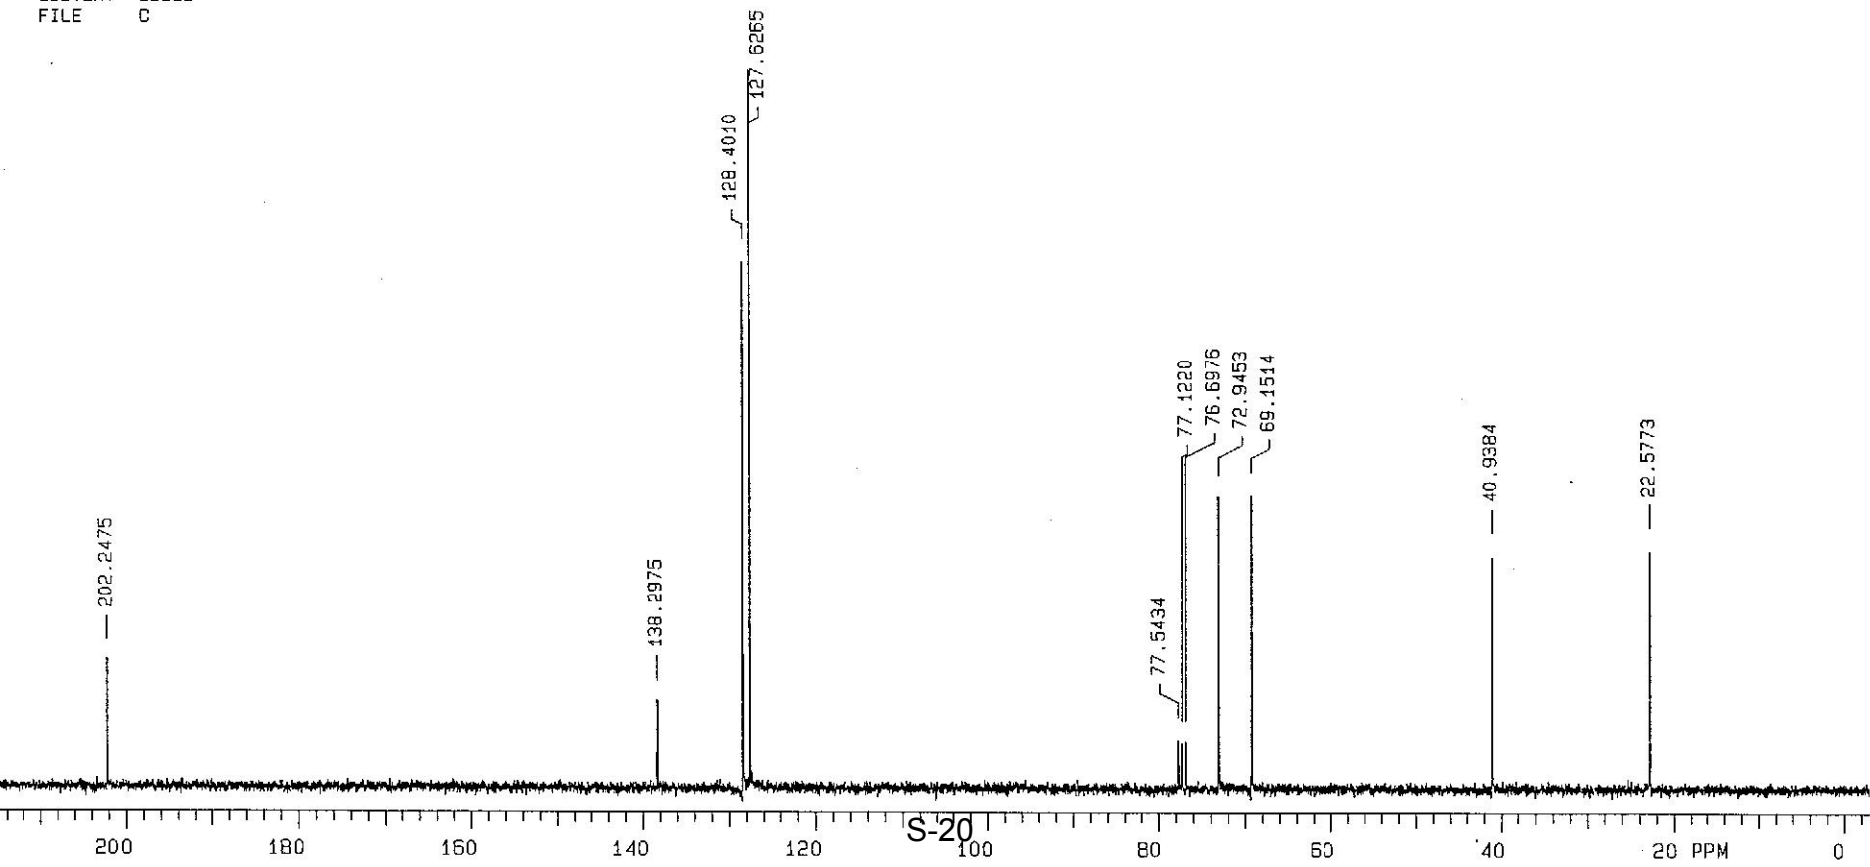

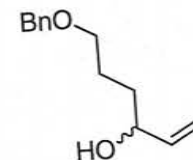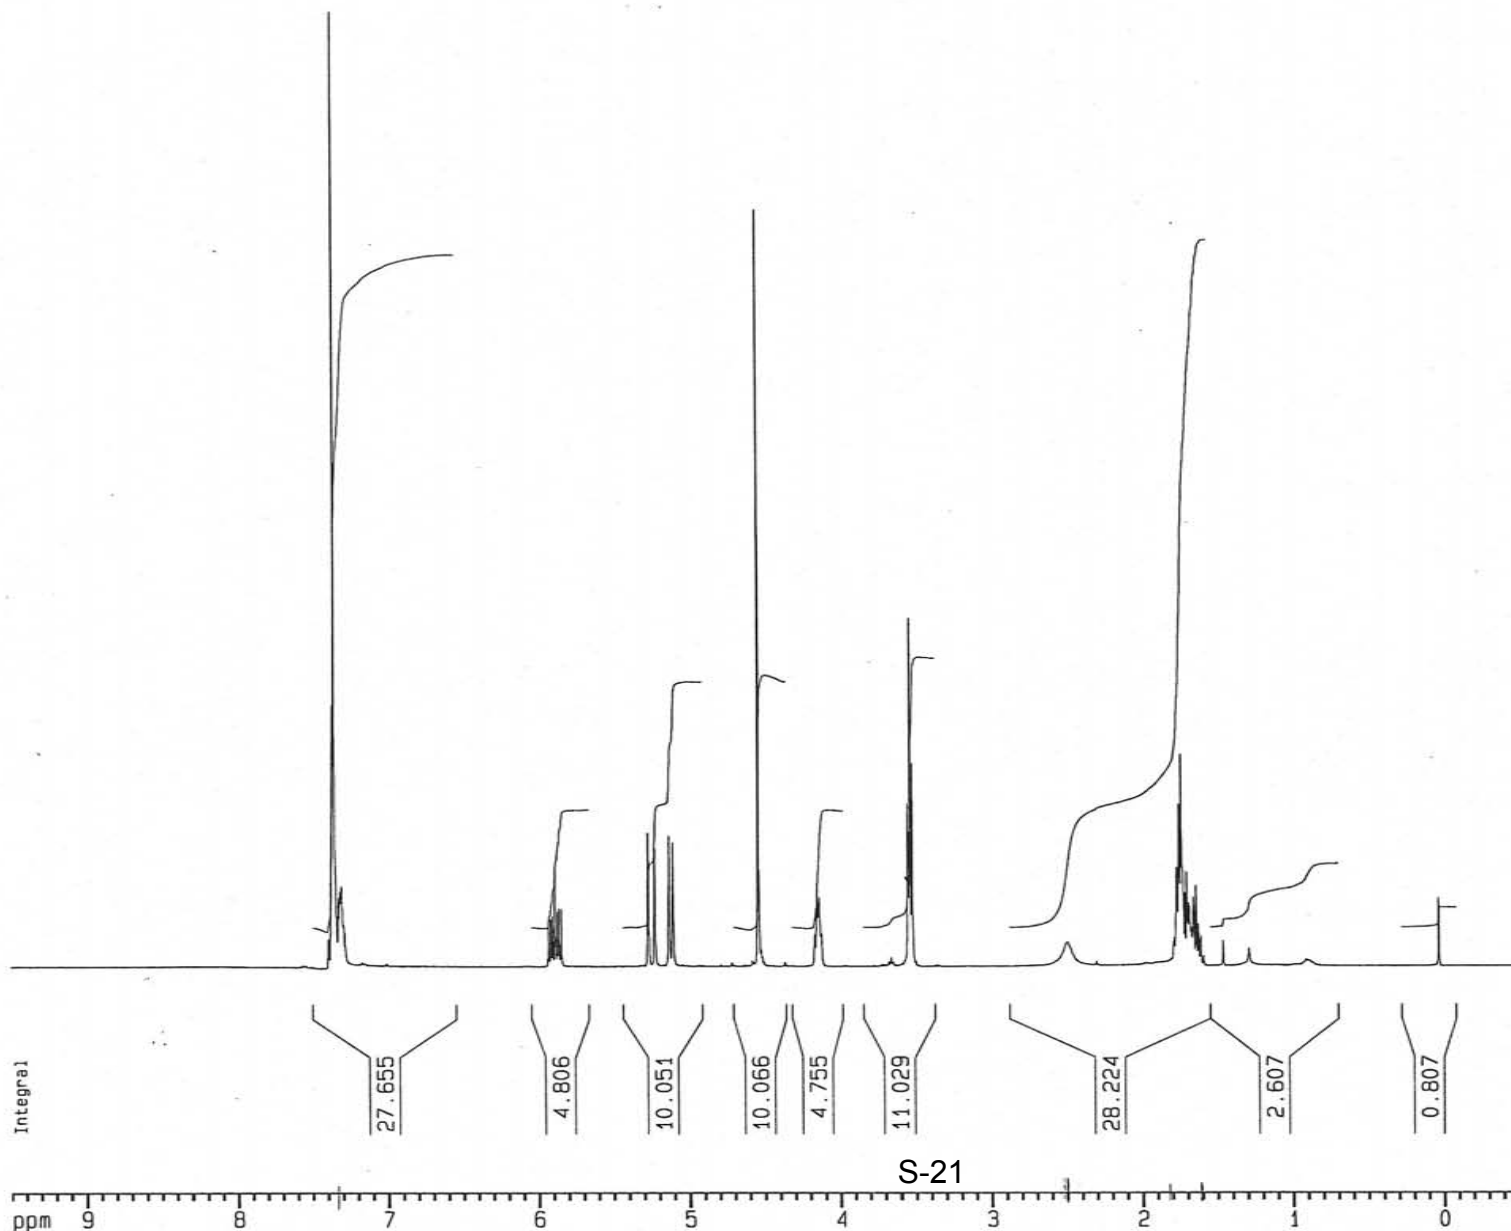

S-21

Current Data Parameters  
 NAME ks3.065  
 EXPNO 1  
 PROCNO 1

F2 - Acquisition Parameters  
 Date\_ 961223  
 Time 10.03  
 INSTRUM drx400  
 PROBHD 5 mm Multinu  
 PULPROG zg30  
 TD 32768  
 SOLVENT CDCl3  
 NS 16  
 DS 2  
 SWH 4789.272 Hz  
 FIDRES 0.146157 Hz  
 AQ 3.4210291 sec  
 RG 64  
 DW 104.400 usec  
 DE 4.50 usec  
 TE 300.0 K  
 D1 1.00000000 sec  
 P1 7.70 usec  
 DE 4.50 usec  
 SFO1 400.1320007 MHz  
 NUC1 1H  
 PL1 -6.00 dB

F2 - Processing parameters  
 SI 16384  
 SF 400.1300000 MHz  
 WDW EM  
 SSB 0  
 LB 0.30 Hz  
 GB 0  
 PC 1.00

1D NMR plot parameters  
 CX 20.00 cm  
 F1P 9.500 ppm  
 F1 3801.24 Hz  
 F2P -0.500 ppm  
 F2 -200.07 Hz  
 PPMCM 0.50000 ppm/cm  
 HZCM 200.06500 Hz/cm

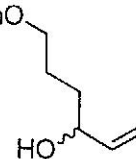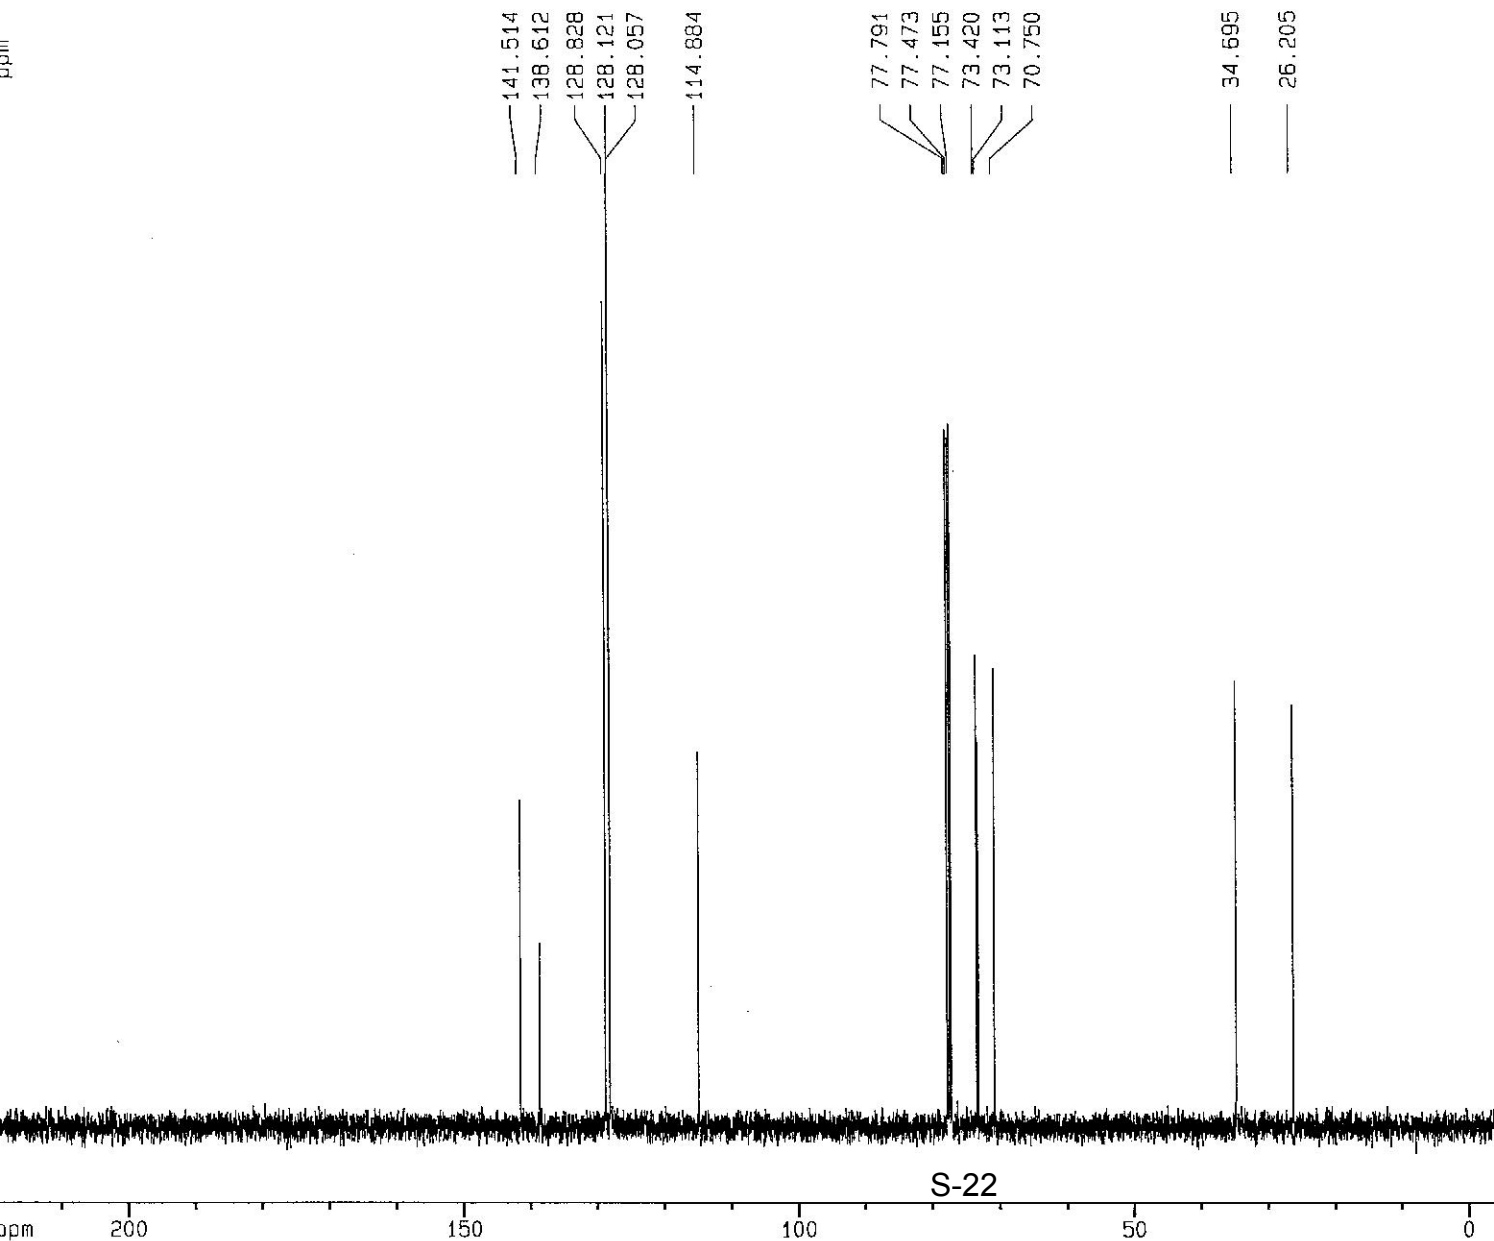

Current Data Parameters  
 NAME ks3.085  
 EXPNO 2  
 PROCNO 1

F2 - Acquisition Parameters

Date\_ 961223  
 Time 10.16  
 INSTRUM drx400  
 PROBHD 5 mm Multinu  
 PULPROG zgpg30  
 TD 65536  
 SOLVENT CDC13  
 NS 256  
 DS 2  
 SWH 23148.148 Hz  
 FIDRES 0.353213 Hz  
 AQ 1.4156276 sec  
 RG 32768  
 DW 21.600 usec  
 DE 4.50 usec  
 TE 300.0 K  
 d11 0.0300000 sec  
 d12 0.0000200 sec  
 PL13 18.00 dB  
 D1 0.05000000 sec  
 CPDPRG2 waltz16  
 PCPD2 100.00 usec  
 SFO2 400.1316005 MHz  
 NUC2 1H  
 PL2 -6.00 dB  
 PL12 18.00 dB  
 P1 6.90 usec  
 DE 4.50 usec  
 SFO1 100.6232933 MHz  
 NUC1 13C  
 PL1 -6.00 dB

F2 - Processing parameters

SI 32768  
 SF 100.6127290 MHz  
 WDW EM  
 SSB 0  
 LB 1.00 Hz  
 GB 0  
 PC 1.40

1D NMR plot parameters

CX 20.00 cm  
 F1P 220.000 ppm  
 F1 22134.80 Hz  
 F2P -5.000 ppm  
 F2 -503.07 Hz  
 PPMCM 11.25000 ppm/cm  
 HZCM 1131.89319 Hz/cm

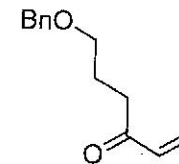

10

Current Data Parameters  
 NAME ks2.267  
 EXPNO 1  
 PROCNO 1

F2 - Acquisition Parameters

Date\_ 961218  
 Time 16.13  
 INSTRUM drx400  
 PROBHD 5 mm Multinu  
 PULPROG zg30  
 TD 32768  
 SOLVENT CDC13  
 NS 16  
 DS 2  
 SWH 4789.272 Hz  
 FIDRES 0.146157 Hz  
 AQ 3.4210291 sec  
 RG 64  
 DW 104.400 usec  
 DE 4.50 usec  
 TE 300.0 K  
 D1 1.00000000 sec  
 P1 7.70 usec  
 DE 4.50 usec  
 SFO1 400.1320007 MHz  
 NUC1 1H  
 PL1 -6.00 dB

F2 - Processing parameters

SI 16384  
 SF 400.1300000 MHz  
 WDW EM  
 SSB 0  
 LB 0.30 Hz  
 GB 0  
 PC 1.00

1D NMR plot parameters

CX 20.00 cm  
 F1P 9.500 ppm  
 F1 3801.24 Hz  
 F2P -0.500 ppm  
 F2 -200.07 Hz  
 PPMCM 0.50000 ppm/cm  
 HZCM 200.06500 Hz/cm

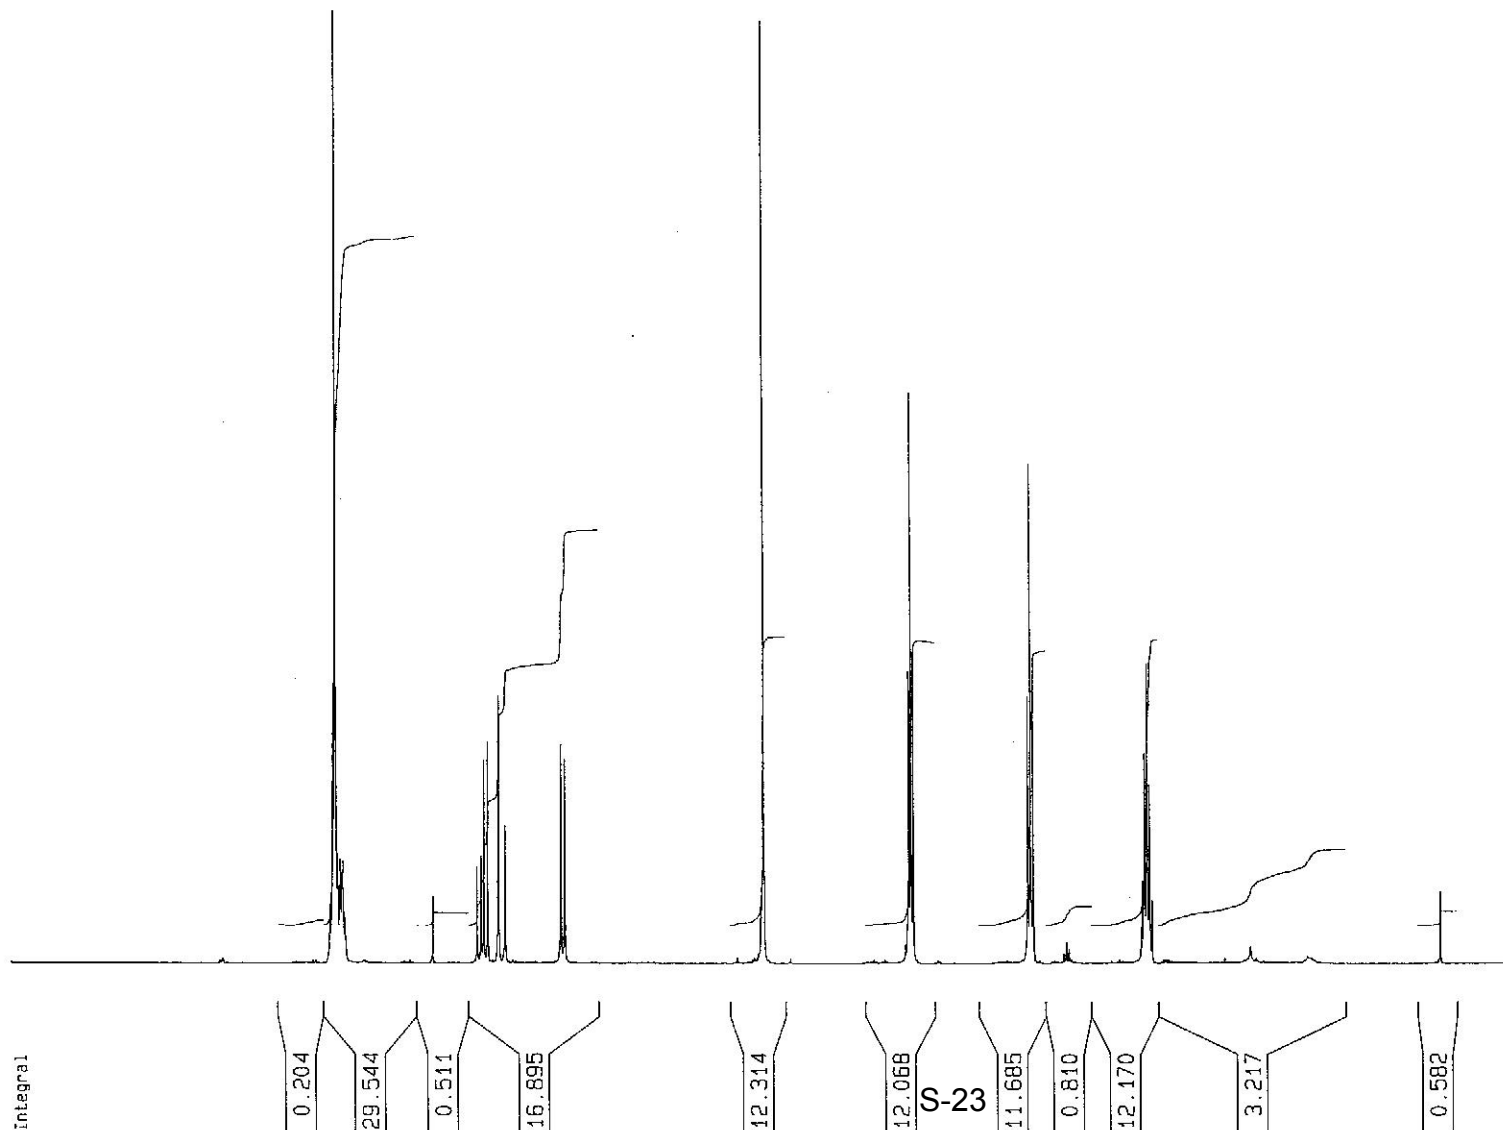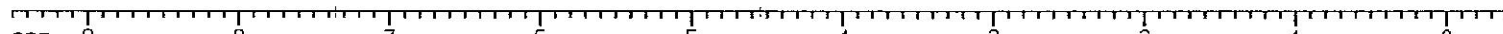

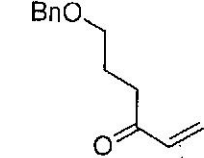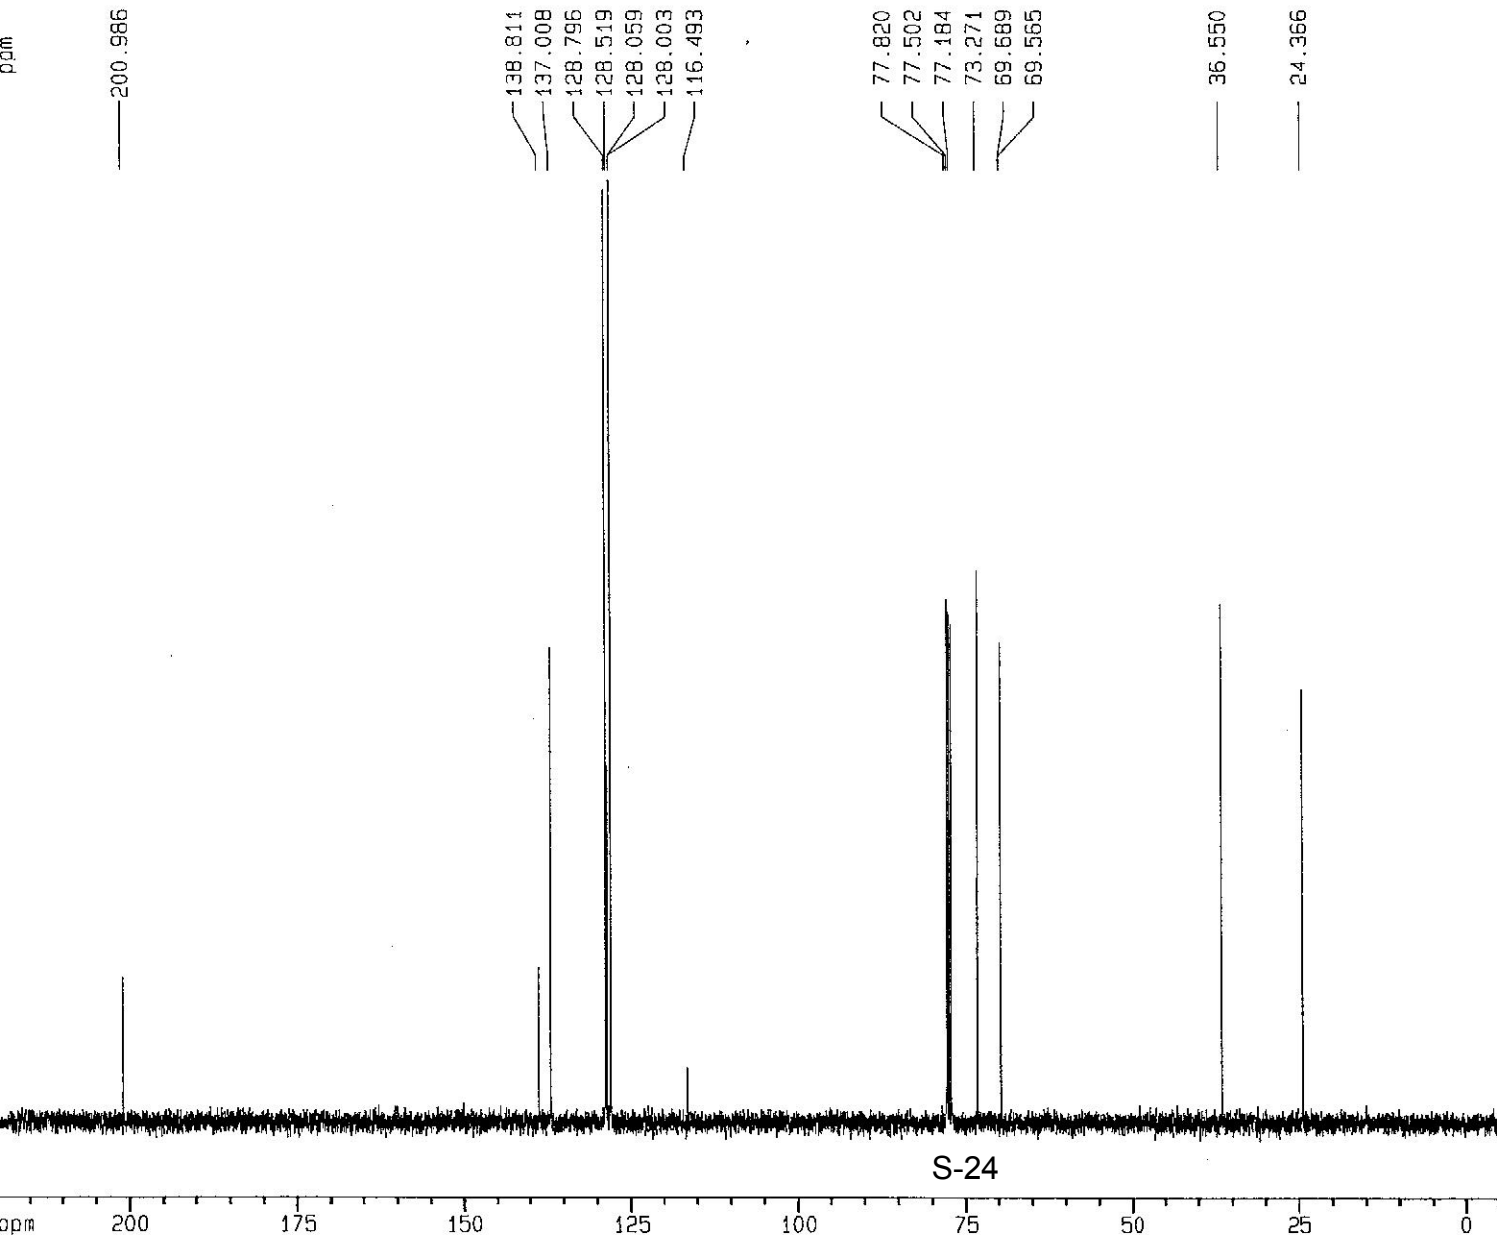

S-24

Current [ 10 parameters  
 NAME ks2.267  
 EXPNO 2  
 PROCNO 1

F2 - Acquisition Parameters  
 Date\_ 961218  
 Time 16.24  
 INSTRUM drx400  
 PROBHD 5 mm Multinu  
 PULPROG zgpg30  
 TD 65536  
 SOLVENT CDC13  
 NS 256  
 DS 2  
 SWH 23148.148 Hz  
 FIDRES 0.353213 Hz  
 AQ 1.4156276 sec  
 RG 32768  
 DW 21.600 usec  
 DE 4.50 usec  
 TE 300.0 K  
 d11 0.0300000 sec  
 d12 0.0000200 sec  
 PL13 18.00 dB  
 D1 0.05000000 sec  
 CPDPRG2 waltz16  
 PCPD2 100.00 usec  
 SFO2 400.1316005 MHz  
 NUC2 1H  
 PL2 -6.00 dB  
 PL12 18.00 dB  
 P1 6.90 usec  
 DE 4.50 usec  
 SFO1 100.6232933 MHz  
 NUC1 13C  
 PL1 -6.00 dB

F2 - Processing parameters  
 SI 32768  
 SF 100.6127290 MHz  
 WDW EM  
 SSB 0  
 LB 1.00 Hz  
 GB 0  
 PC 1.40

1D NMR plot parameters  
 CX 20.00 cm  
 F1P 220.000 ppm  
 F1 22134.80 Hz  
 F2P -5.000 ppm  
 F2 -503.07 Hz  
 PPMCM 11.25000 ppm/cm  
 HZCM 1131.89319 Hz/cm



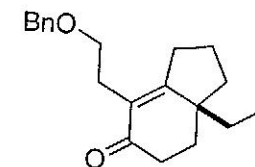

8

Current Data Parameters  
 NAME ks3.032  
 EXPNO 1  
 PROCNO 1

F2 - Acquisition Parameters  
 Date\_ 961216  
 Time 7.12  
 INSTRUM drx400  
 PROBHD 5 mm Multinu  
 PULPROG zg30  
 TD 32768  
 SOLVENT CDCl3  
 NS 16  
 DS 2  
 SWH 4789.272 Hz  
 FIDRES 0.146157 Hz  
 AQ 3.4210291 sec  
 RG 114  
 DW 104.400 usec  
 DE 4.50 usec  
 TE 300.0 K  
 D1 1.00000000 sec  
 P1 7.70 usec  
 DE 4.50 usec  
 SF01 400.1320007 MHz  
 NUC1 1H  
 PL1 -6.00 dB

F2 - Processing parameters  
 SI 16384  
 SF 400.1300000 MHz  
 WDW EM  
 SSB 0  
 LB 0.30 Hz  
 GB 0  
 PC 1.00

1D NMR plot parameters  
 CX 20.00 cm  
 F1P 9.500 ppm  
 F1 3801.24 Hz  
 F2P -0.500 ppm  
 F2 -200.07 Hz  
 PPMCM 0.50000 ppm/cm  
 HZCM 200.06500 Hz/cm

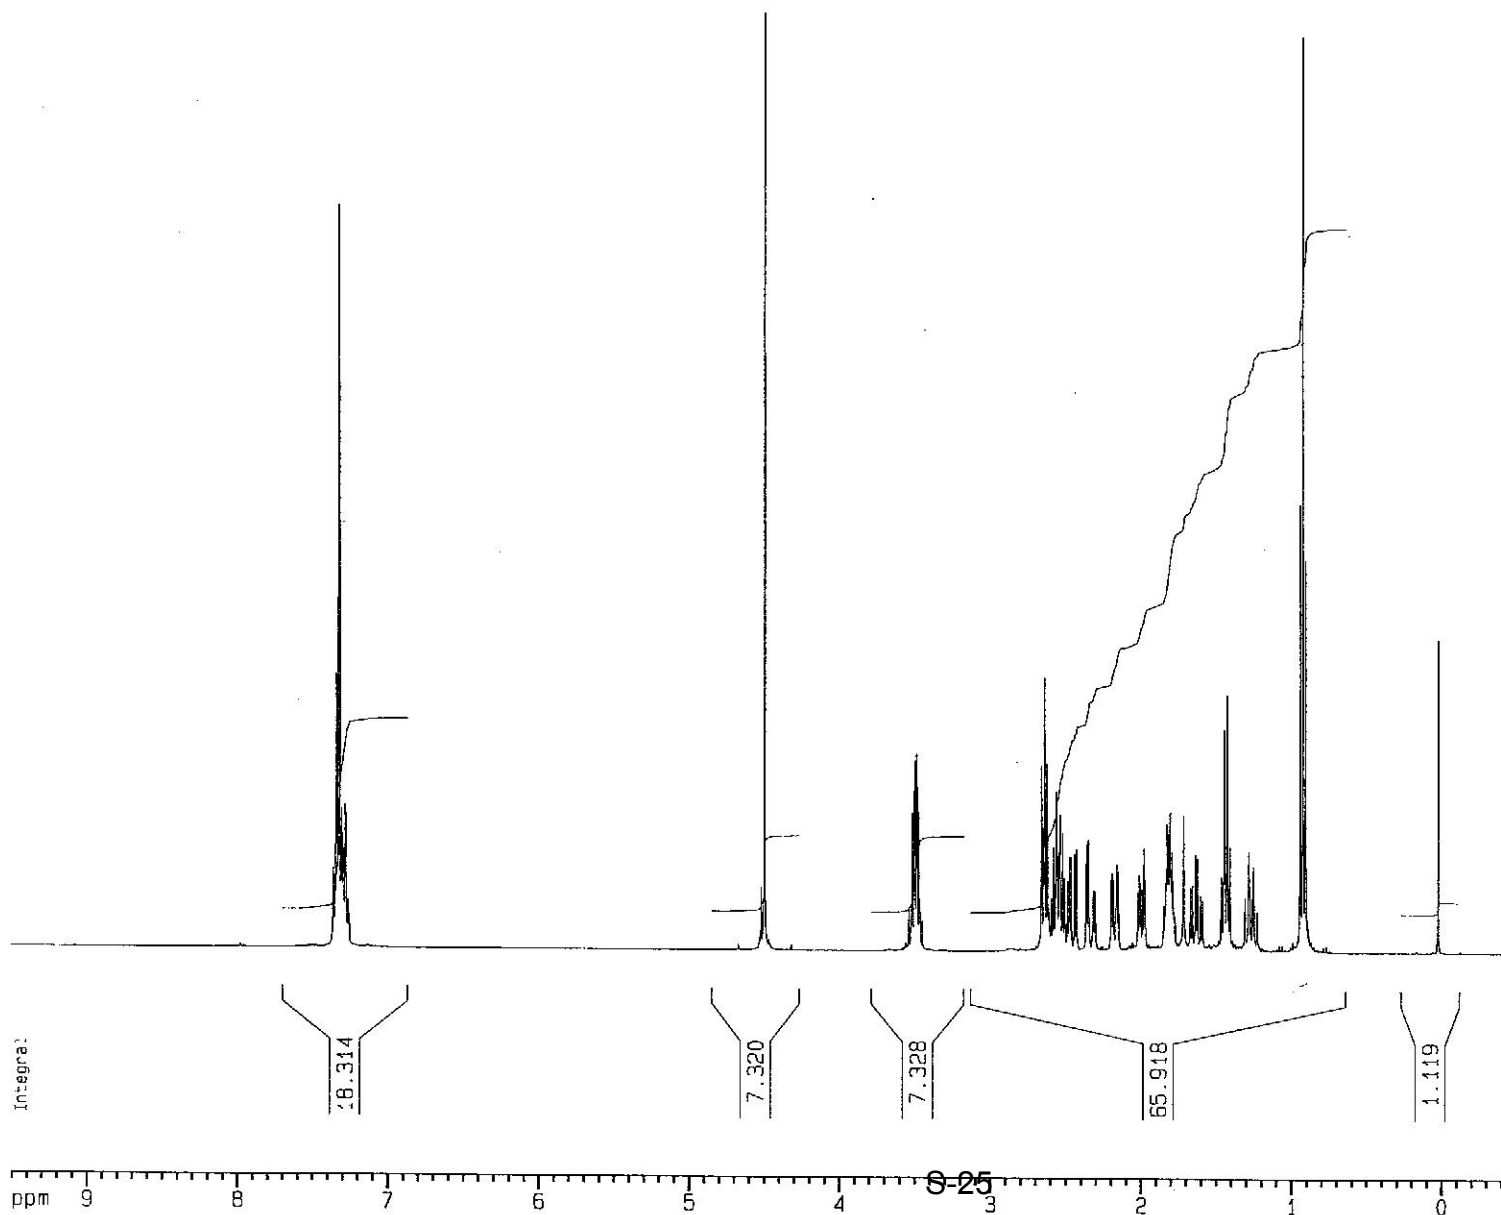

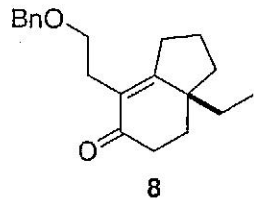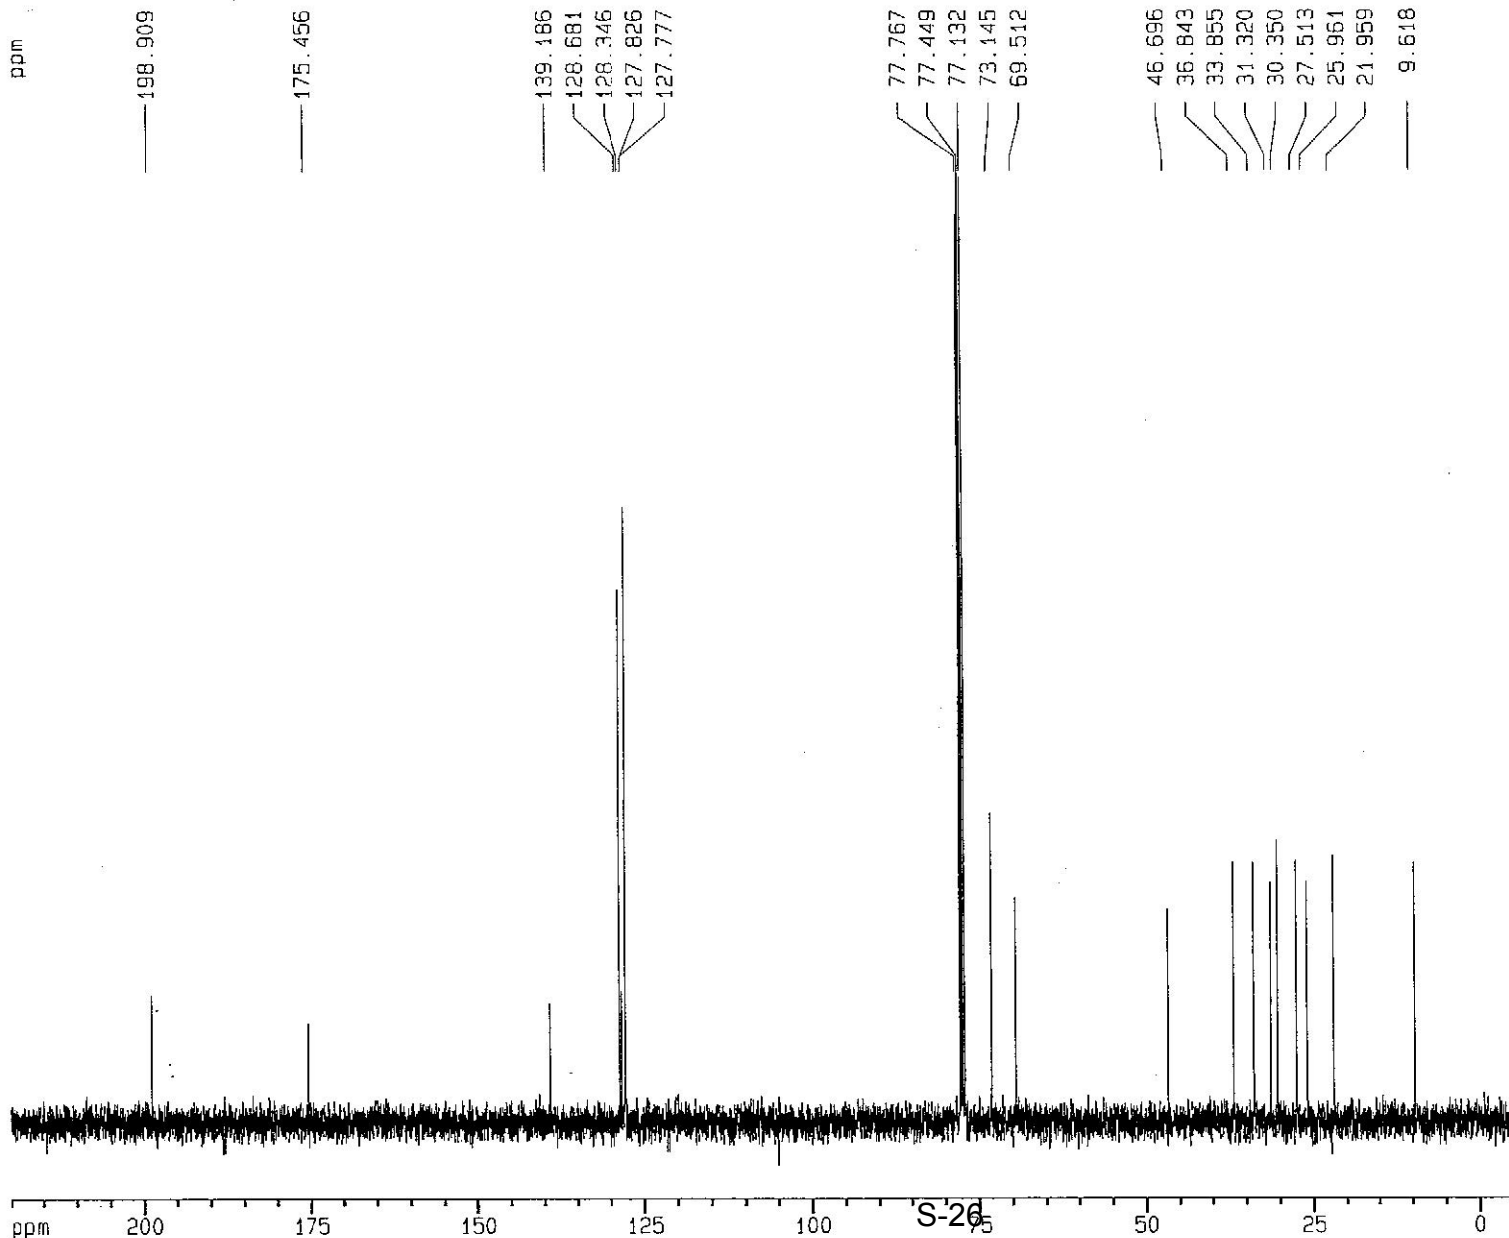

Current Data Parameters  
 NAME ks3.032  
 EXPNO 2  
 PROCNO 1

F2 - Acquisition Parameters  
 Date\_ 961216  
 Time 7.34  
 INSTRUM drx400  
 PROBHD 5 mm Multinu  
 PULPROG zgpg30  
 TD 65536  
 SOLVENT CDC13  
 NS 256  
 DS 2  
 SWH 23148.148 Hz  
 FIDRES 0.353213 Hz  
 AQ 1.4156276 sec  
 RG 32768  
 DW 21.600 usec  
 DE 4.50 usec  
 TE 300.0 K  
 d11 0.0300000 sec  
 d12 0.0000200 sec  
 PL13 18.00 dB  
 D1 0.05000000 sec  
 CPDPRG2 waltz16  
 PCPD2 100.00 usec  
 SF02 400.1316003 MHz  
 NUC2 13  
 PL2 -6.00 dB  
 PL12 18.00 dB  
 P1 6.90 usec  
 DE 4.50 usec  
 SF01 100.6232933 MHz  
 NUC1 13C  
 PL1 -6.00 dB

F2 - Processing parameters  
 SI 32768  
 SF 100.6127290 MHz  
 WDW EM  
 SSB 0  
 LB 1.00 Hz  
 GB 0  
 PC 1.40

1D NMR plot parameters  
 CX 20.00 cm  
 F1P 220.000 ppm  
 F1 22134.80 Hz  
 F2P -5.000 ppm  
 F2 -503.07 Hz  
 PPMCM 11.25000 ppm/cm  
 HZCM 1131.89319 Hz/cm

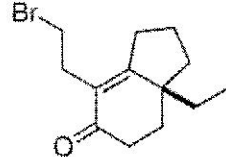

16a

Current Data Parameters  
 NAME ks2.193  
 EXPNO 1  
 PROCNO 1

F2 - Acquisition Parameters  
 Date\_ 970430  
 Time 13 00  
 INSTRUM drx400  
 PROBHD 5 mm Multinu  
 PULPROG zg30  
 TD 32768  
 SOLVENT COC13  
 NS 16  
 DS 2  
 SWH 4789.272 Hz  
 FIDRES 0.146157 Hz  
 AQ 3.4210291 sec  
 RG 114  
 DW 104.400 usec  
 DE 4.50 usec  
 TE 300.0 K  
 D1 1.00000000 sec  
 P1 7.70 usec  
 DE 4.50 usec  
 SFO1 400.1320007 MHz  
 NUC1 1H  
 PL1 -6.00 dB

F2 - Processing parameters  
 SI 16384  
 SF 400.1300000 MHz  
 WDW EM  
 SSB 0  
 LB 0.30 Hz  
 GB 0  
 PC 1.00

1D NMR plot parameters  
 CX 20.00 cm  
 F1P 9.500 ppm  
 F1 3801.24 Hz  
 F2P -0.500 ppm  
 F2 -200.07 Hz  
 PPMCM 0.50000 ppm/cm  
 HZCM 200.06500 Hz/cm

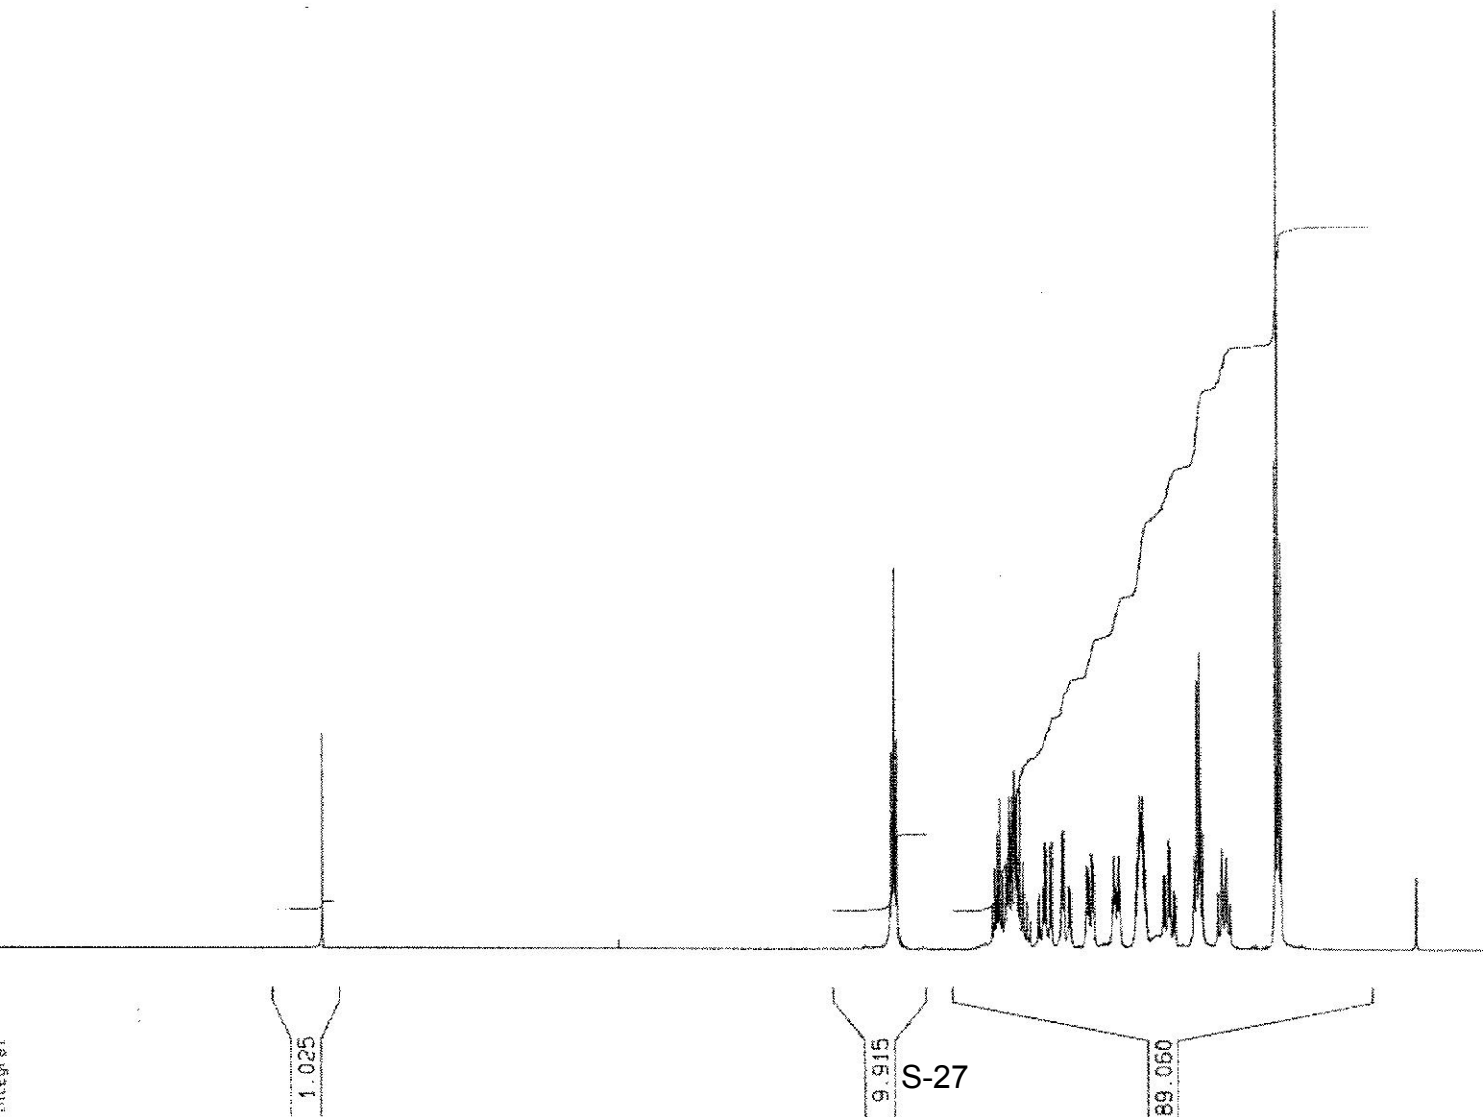

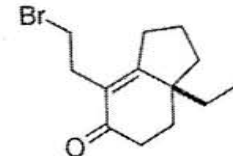

16a

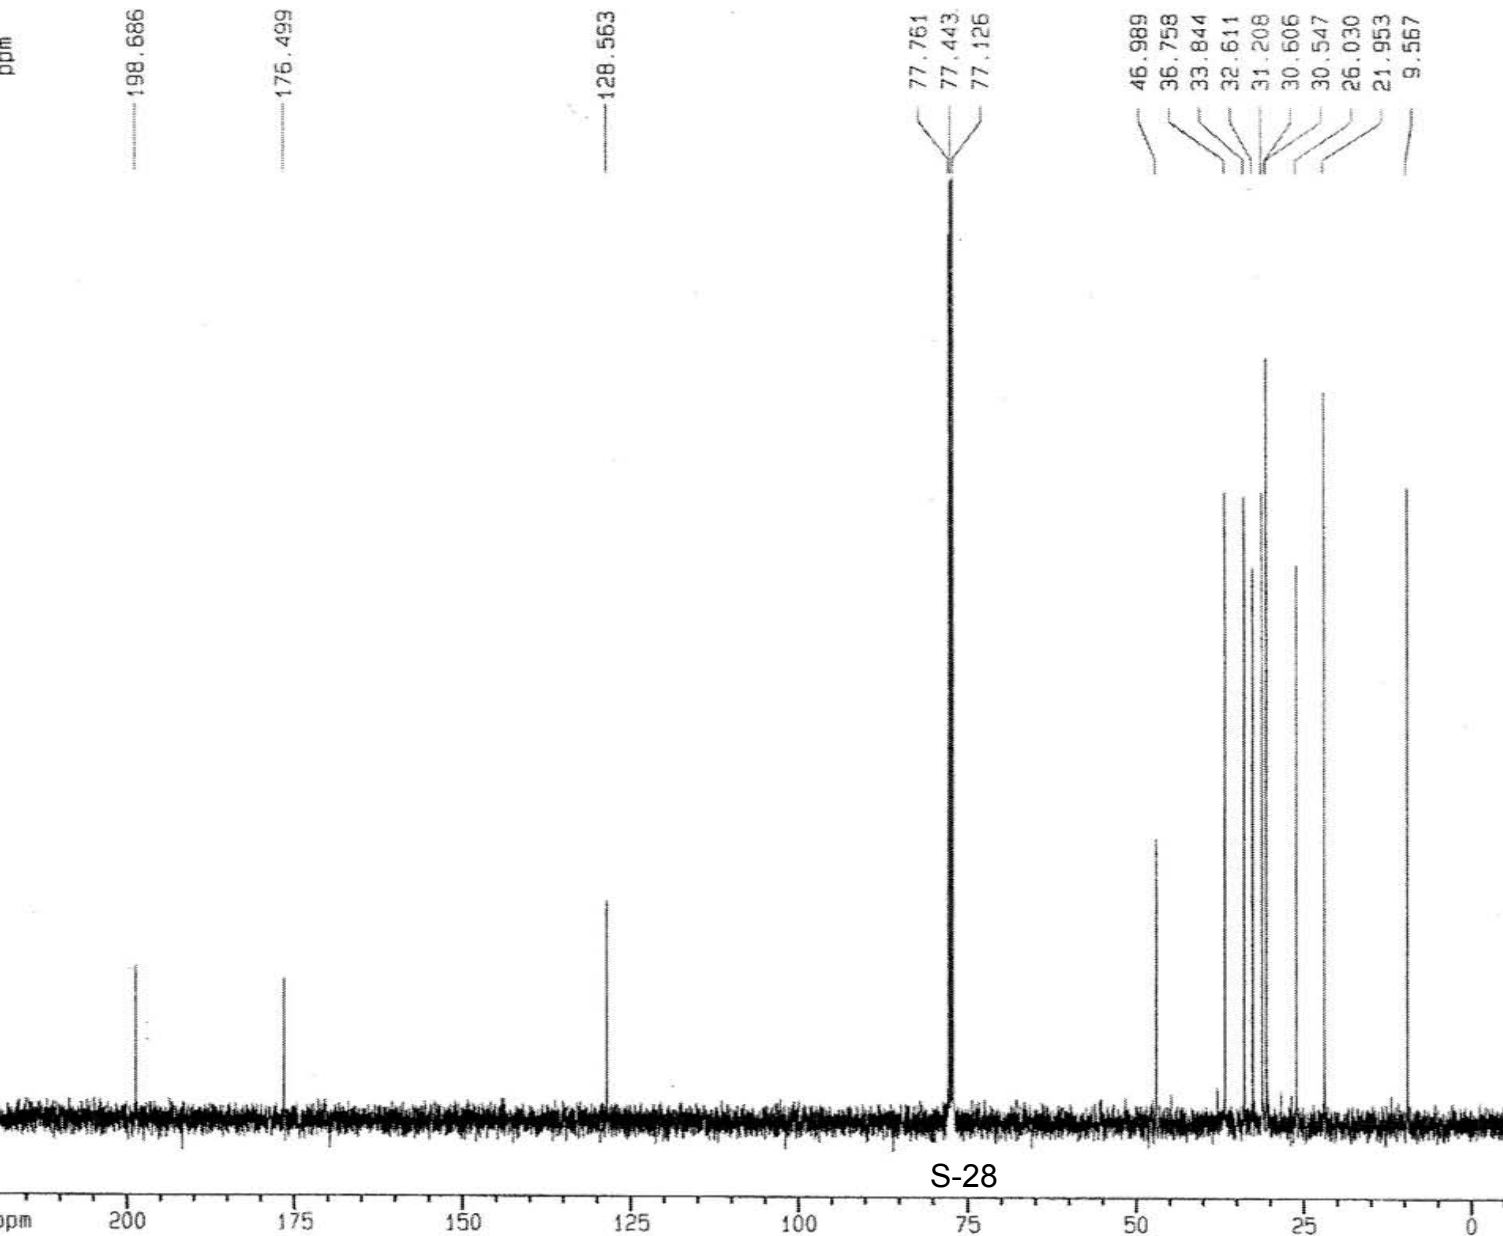

Current Data Parameters  
 NAME ks2.193  
 EXPNO 2  
 PROCNO 1

F2 - Acquisition Parameters  
 Date\_ 970430  
 Time 13.31  
 INSTRUM drx400  
 PROBHD 5 mm Multinu  
 PULPROG zgpg30  
 TD 65536  
 SOLVENT CDCl3  
 NS 512  
 DS 2  
 SWH 23148.148 Hz  
 FIDRES 0.353213 Hz  
 AQ 1.4156276 sec  
 RG 32768  
 DW 21.600 usec  
 DE 4.50 usec  
 TE 300.0 K  
 d11 0.0300000 sec  
 d12 0.0000200 sec  
 PL13 18.00 dB  
 D1 0.05000000 sec  
 CPDPRG2 waltz16  
 PCPD2 100.00 usec  
 SFO2 400.1316005 MHz  
 NUC2 1H  
 PL2 -6.00 dB  
 PL12 18.00 dB  
 P1 6.90 usec  
 DE 4.50 usec  
 SFO1 100.6232933 MHz  
 NUC1 13C  
 PL1 -6.00 dB

F2 - Processing parameters  
 SI 32768  
 SF 100.6127290 MHz  
 WDW EM  
 SSB 0  
 LB 1.00 Hz  
 GB 0  
 PC 1.40

1D NMR plot parameters  
 CX 20.00 cm  
 F1P 220.000 ppm  
 F1 22134.80 Hz  
 F2P -5.000 ppm  
 F2 -503.07 Hz  
 PPMCM 11.25000 ppm/cm  
 HZCM 1131.69319 Hz/cm

S-28

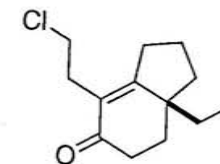

16b

Current Data Parameters  
 NAME ks3.057  
 EXPNO 1  
 PROCNO 1

F2 - Acquisition Parameters  
 Date\_ 961216  
 Time 12.55  
 INSTRUM drx400  
 PROBHD 5 mm Multinu  
 PULPROG zg30  
 TD 32768  
 SOLVENT CDC13  
 NS 16  
 DS 2  
 SWH 4789.272 Hz  
 FIDRES 0.146157 Hz  
 AQ 3.4210291 sec  
 RG 114  
 DW 104.400 usec  
 DE 4.50 usec  
 TE 300.0 K  
 D1 1.00000000 sec  
 P1 7.70 usec  
 DE 4.50 usec  
 SF01 400.1320007 MHz  
 NUC1 1H  
 PL1 -6.00 dB

F2 - Processing parameters  
 SI 16384  
 SF 400.1300000 MHz  
 WDW EM  
 SSB 0  
 LB 0.30 Hz  
 GB 0  
 PC 1.00

1D NMR plot parameters  
 CX 20.00 cm  
 F1P 9.500 ppm  
 F1 3801.24 Hz  
 F2P -0.500 ppm  
 F2 -200.07 Hz  
 PPMCM 0.50000 ppm/cm  
 HZCM 200.06500 Hz/cm

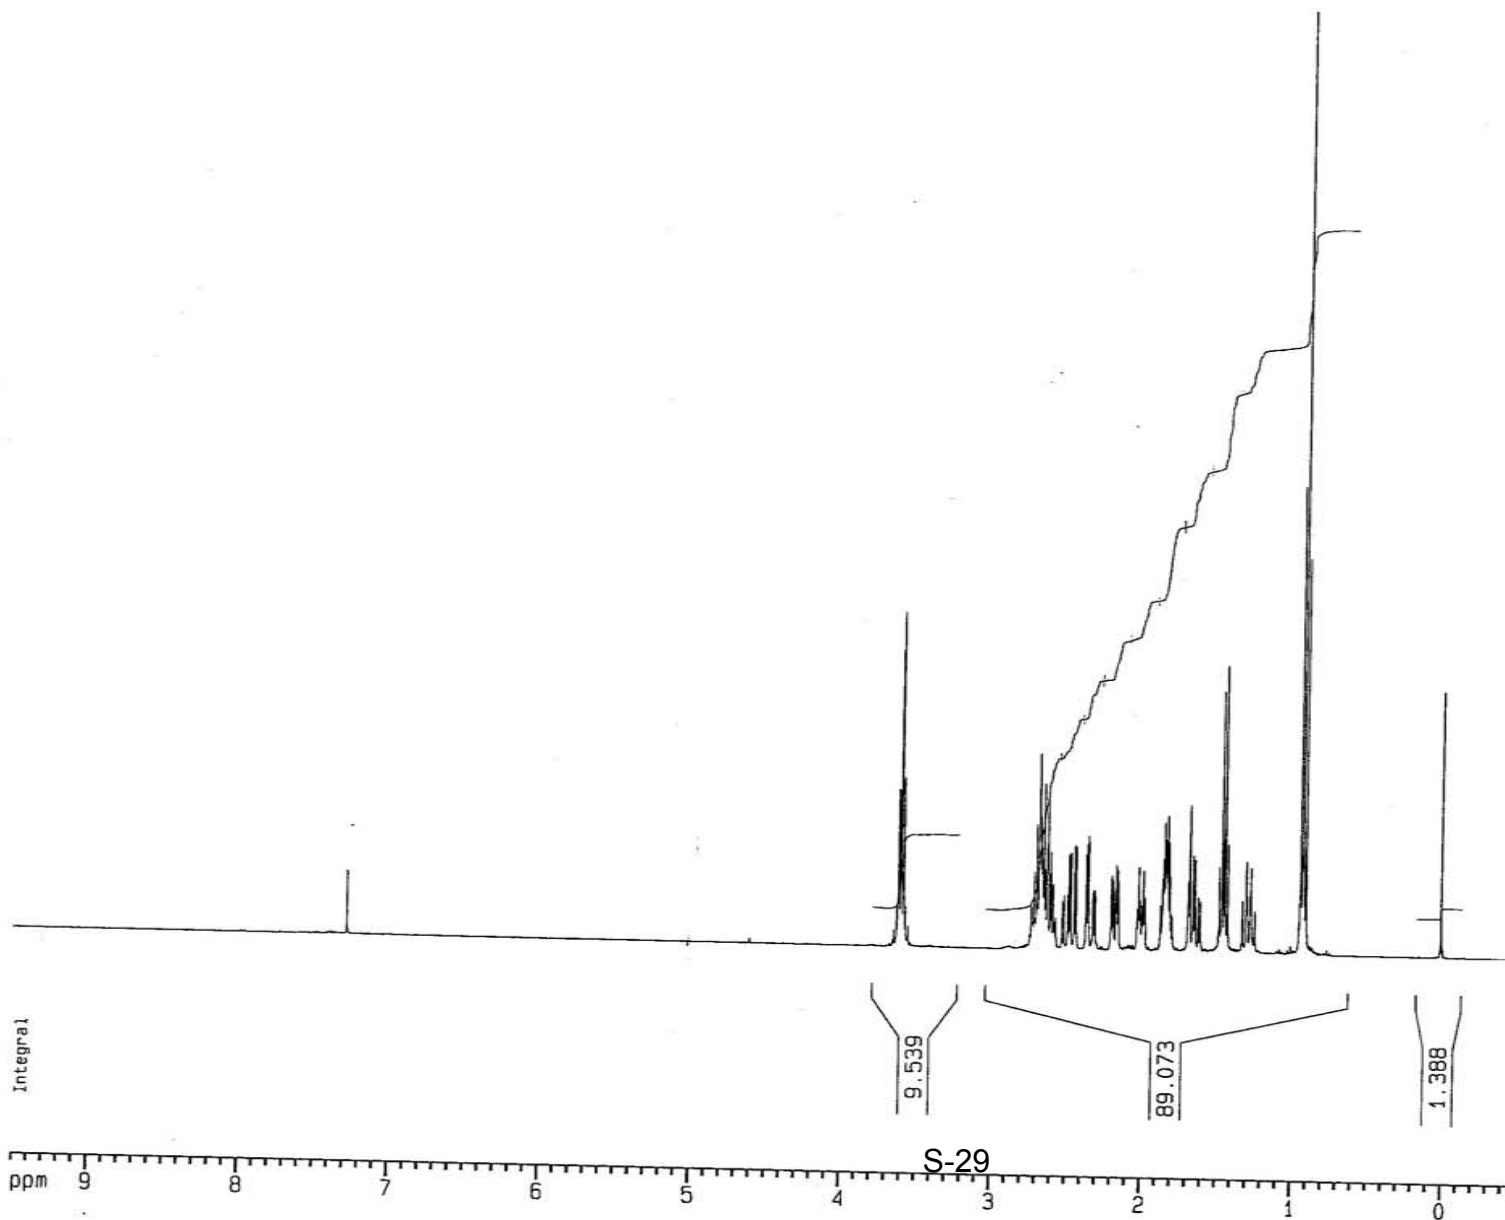

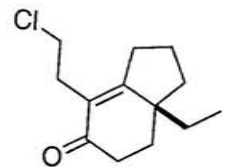

**16b**

Current Data Parameters  
 NAME ks3\_057  
 EXPNO 2  
 PROCNO 1

F2 - Acquisition Parameters

Date\_ 961216  
 Time 13.23  
 INSTRUM drx400  
 PROBHD 5 mm Multinu  
 PULPROG zgpg30  
 TD 65536  
 SOLVENT CDC13  
 NS 256  
 DS 2  
 SWH 23148.148 Hz  
 FIDRES 0.353213 Hz  
 AQ 1.4156276 sec  
 RG 32768  
 DW 21.600 usec  
 DE 4.50 usec  
 TE 300.0 K  
 d11 0.0300000 sec  
 d12 0.0000200 sec  
 PL13 18.00 dB  
 D1 0.05000000 sec  
 CPDPRG2 waltz16  
 PCPD2 -100.00 usec  
 SF02 400.1316005 MHz  
 NUC2 1H  
 PL2 -6.00 dB  
 PL12 18.00 dB  
 P1 6.90 usec  
 DE 4.50 usec  
 SF01 100.6232933 MHz  
 NUC1 13C  
 PL1 -6.00 dB

F2 - Processing parameters

SI 32768  
 SF 100.6127290 MHz  
 WDW EM  
 SSB 0  
 LB 1.00 Hz  
 GB 0  
 PC 1.40

1D NMR plot parameters

CX 20.00 cm  
 F1P 220.000 ppm  
 F1 22134.80 Hz  
 F2P -5.000 ppm  
 F2 -503.07 Hz  
 PPMCM 11.25000 ppm/cm  
 HZCM 1131.89319 Hz/cm

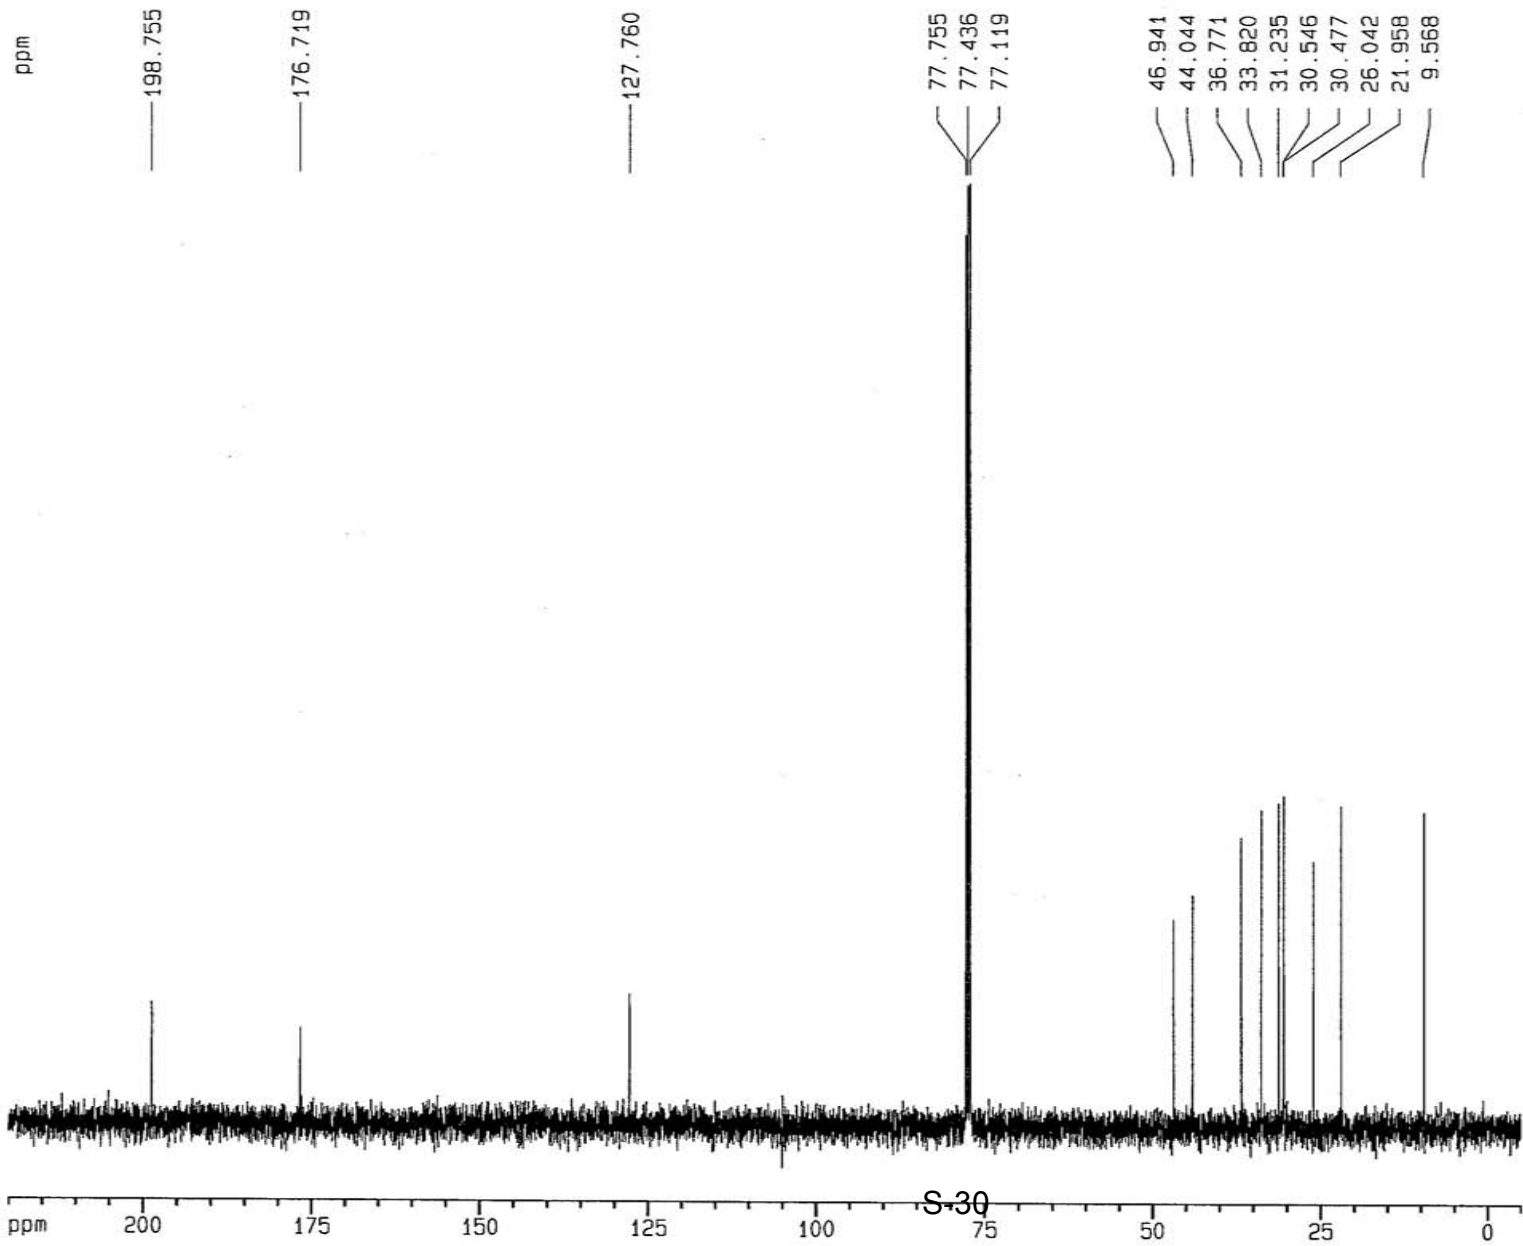

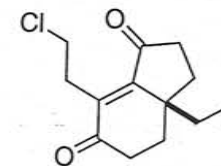

17

Current Data Parameters

NAME ks3.274  
 EXPNO 1  
 PROCNO 1

F2 - Acquisition Parameters

Date\_ 970422  
 Time 15.07  
 INSTRUM drx400  
 PROBHD 5 mm Multinu  
 PULPROG zg30  
 TO 32768  
 SOLVENT CDC13  
 NS 16  
 DS 2  
 SWH 4789.272 Hz  
 FIDRES 0.146157 Hz  
 AQ 3.4210291 sec  
 RG 90.5  
 DW 104.400 usec  
 DE 4.50 usec  
 TE 300.0 K  
 D1 1.00000000 sec  
 P1 7.70 usec  
 DE 4.50 usec  
 SFO1 400.1320007 MHz  
 NUC1 1H  
 PL1 -6.00 dB

F2 - Processing parameters

SI 16384  
 SF 400.1300000 MHz  
 WDW EM  
 SSB 0  
 LB 0.30 Hz  
 GB 0  
 PC 1.00

1D NMR plot parameters

CX 20.00 cm  
 F1P 9.500 ppm  
 F1 3801.24 Hz  
 F2P -0.500 ppm  
 F2 -200.07 Hz  
 PPMCM 0.50000 ppm/cm  
 HZCM 200.06500 Hz/cm

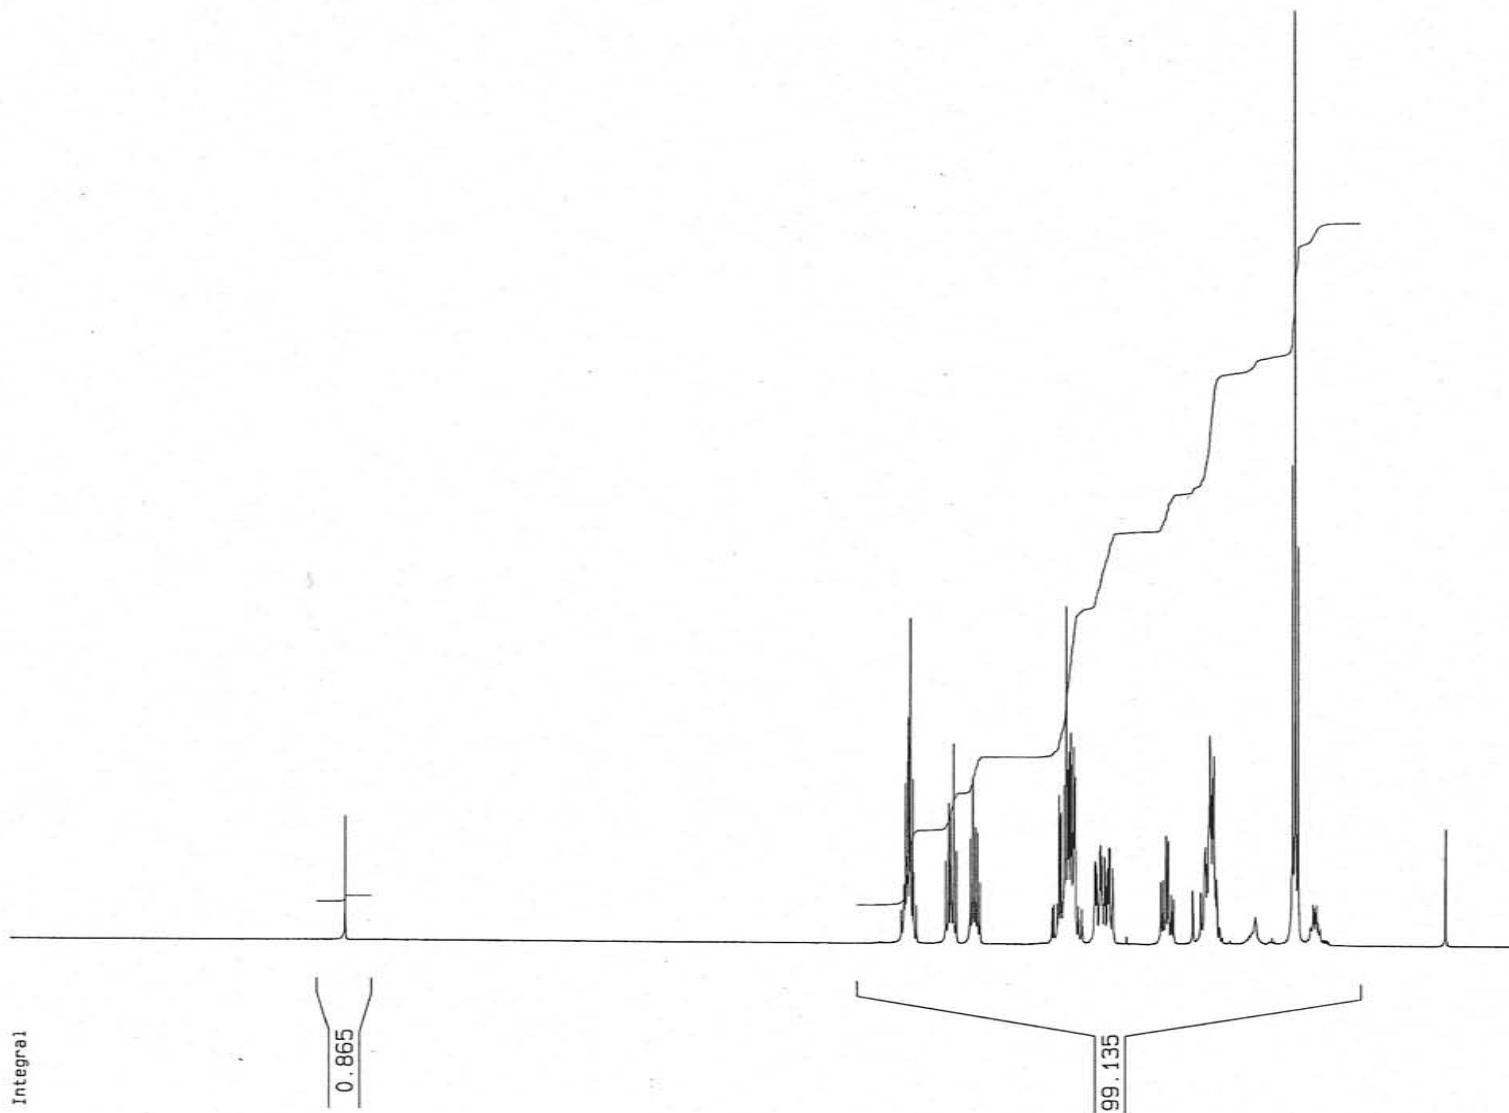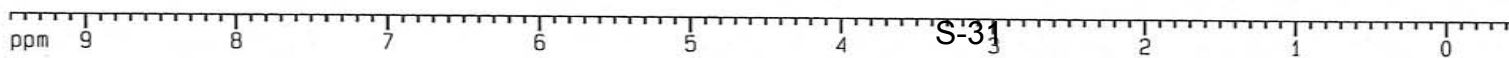

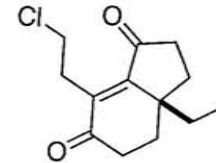

17

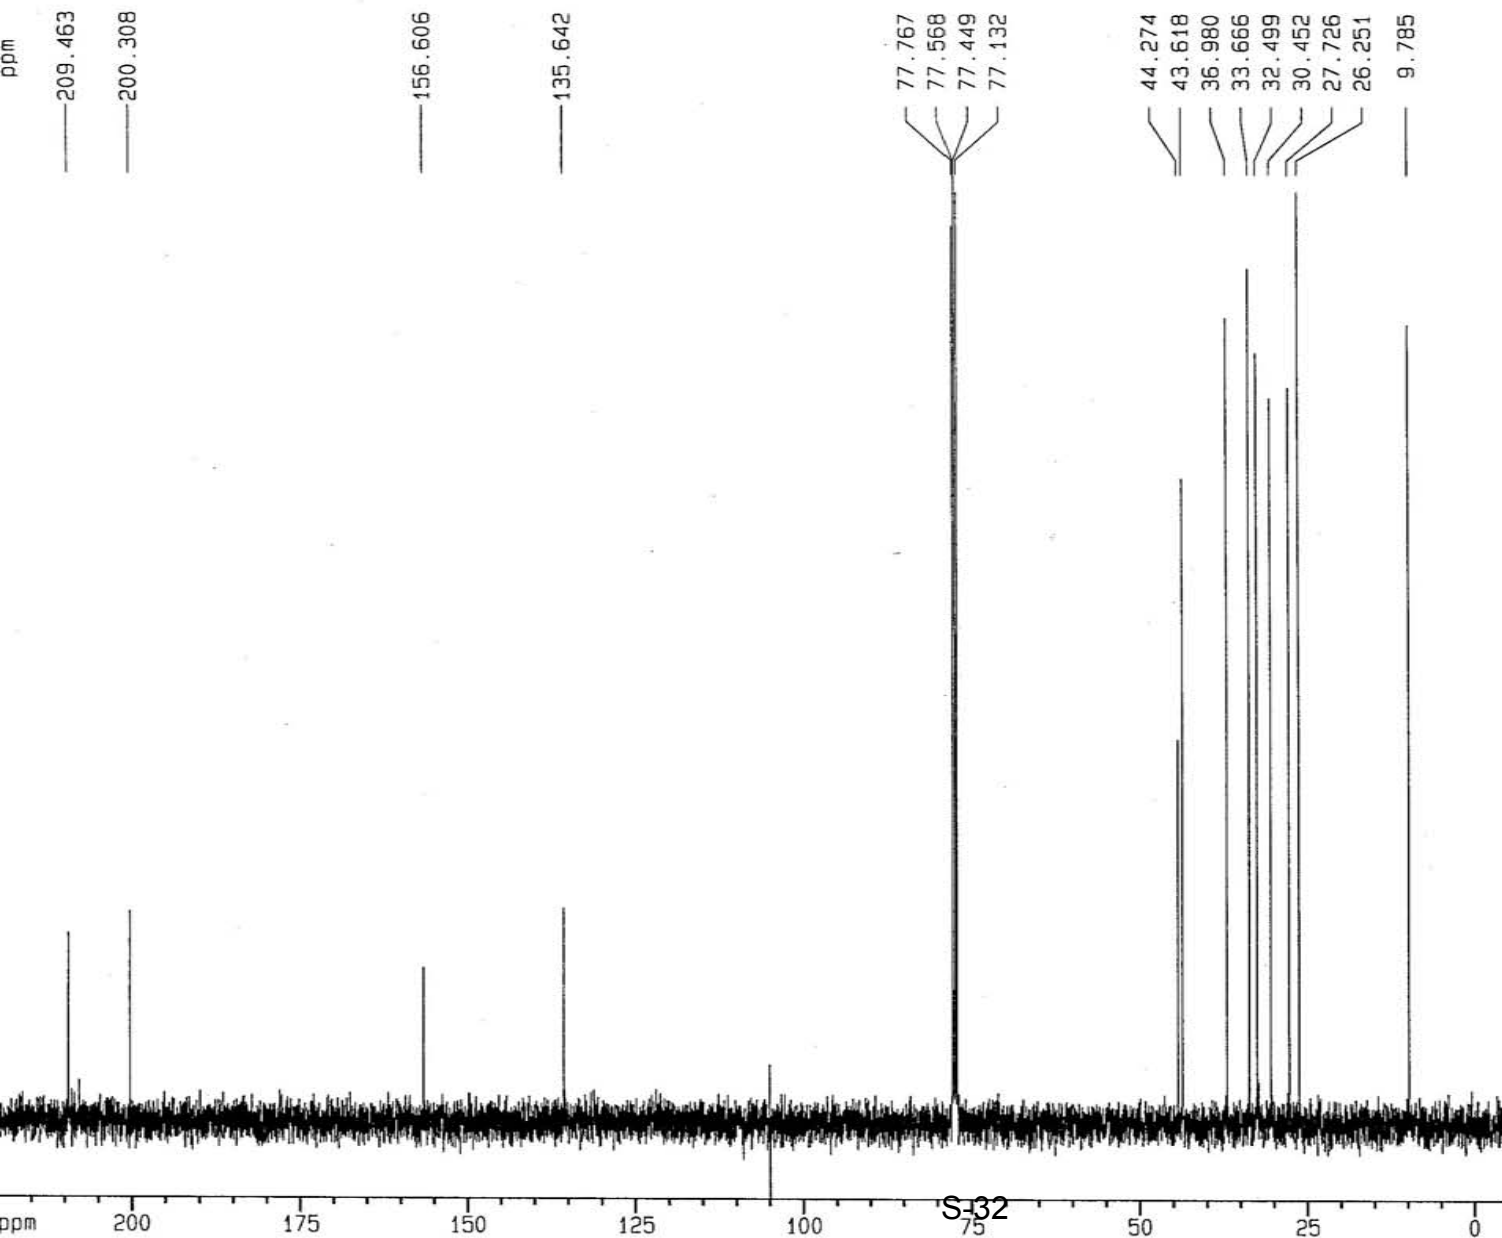

Current Data Parameters  
 NAME ks3.274  
 EXPNO 3  
 PROCNO 1

F2 - Acquisition Parameters  
 Date\_ 970422  
 Time 15.28  
 INSTRUM drx400  
 PROBHD 5 mm Multinu  
 PULPROG zgpg30  
 TD 65536  
 SOLVENT CDC13  
 NS 256  
 DS 2  
 SWH 23148.148 Hz  
 FIDRES 0.353213 Hz  
 AQ 1.4156276 sec  
 RG 32768  
 DW 21.600 usec  
 DE 4.50 usec  
 TE 300.0 K  
 d11 0.0300000 sec  
 d12 0.0000200 sec  
 PL13 18.00 dB  
 D1 0.05000000 sec  
 CPDPRG2 waltz16  
 PCPD2 100.00 usec  
 SF02 400.1316005 MHz  
 NUC2 1H  
 PL2 -6.00 dB  
 PL12 18.00 dB  
 P1 6.90 usec  
 DE 4.50 usec  
 SF01 100.6232933 MHz  
 NUC1 13C  
 PL1 -6.00 dB

F2 - Processing parameters  
 SI 32768  
 SF 100.6127290 MHz  
 WDW EM  
 SSB 0  
 LB 1.00 Hz  
 GB 0  
 PC 1.40

1D NMR plot parameters  
 CX 20.00 cm  
 F1P 220.036 ppm  
 F1 22138.41 Hz  
 F2P -5.000 ppm  
 F2 -503.06 Hz  
 PPMCM 11.25179 ppm/cm  
 HZCM 1132.07385 Hz/cm



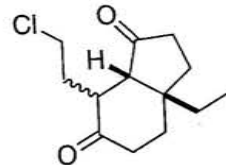

18

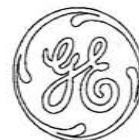

GE NMR  
QE PLUS

KSIII-083

11 JAN 96

RESUBMITTED

OPERATOR: KEF

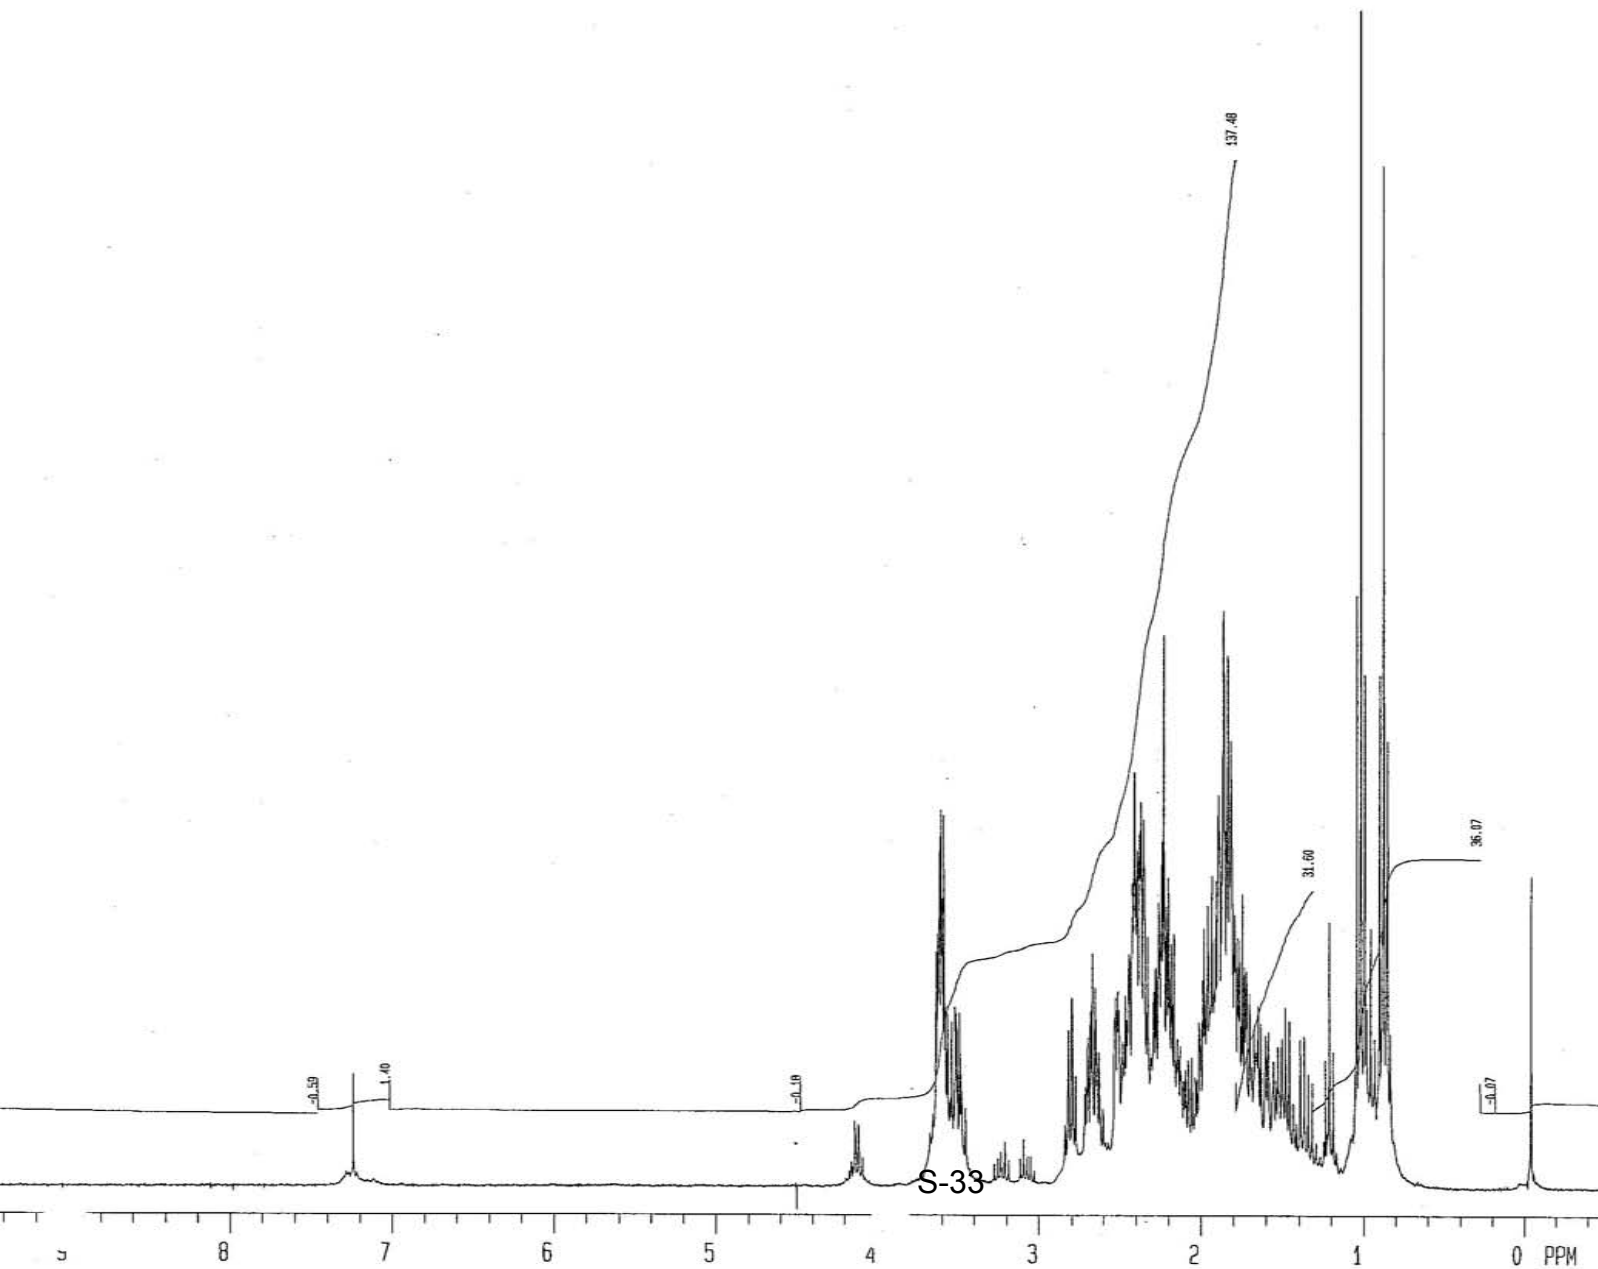

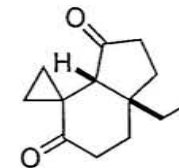

19

Current Data Parameters  
 NAME ks3.097  
 EXPNO 1  
 PROCNO 1

F2 - Acquisition Parameters  
 Date\_ 970423  
 Time 12.34  
 INSTRUM drx400  
 PROBHD 5 mm Multinu  
 PULPROG zg30  
 TD 32768  
 SOLVENT CDCl3  
 NS 16  
 DS 2  
 SWH 4789.272 Hz  
 FIDRES 0.146157 Hz  
 AQ 3.4210291 sec  
 RG 114  
 DW 104.400 usec  
 DE 4.50 usec  
 TE 300.0 K  
 D1 1.00000000 sec  
 P1 7.70 usec  
 DE 4.50 usec  
 SF01 400.1320007 MHz  
 NUC1 1H  
 PL1 -6.00 dB

F2 - Processing parameters  
 SI 16384  
 SF 400.1300000 MHz  
 WDW EM  
 SSB 0  
 LB 0.30 Hz  
 GB 0  
 PC 1.00

1D NMR plot parameters  
 CX 20.00 cm  
 F1P 9.500 ppm  
 F1 3801.24 Hz  
 F2P -0.500 ppm  
 F2 -200.07 Hz  
 PPMCM 0.50000 ppm/cm  
 HZCM 200.06500 Hz/cm

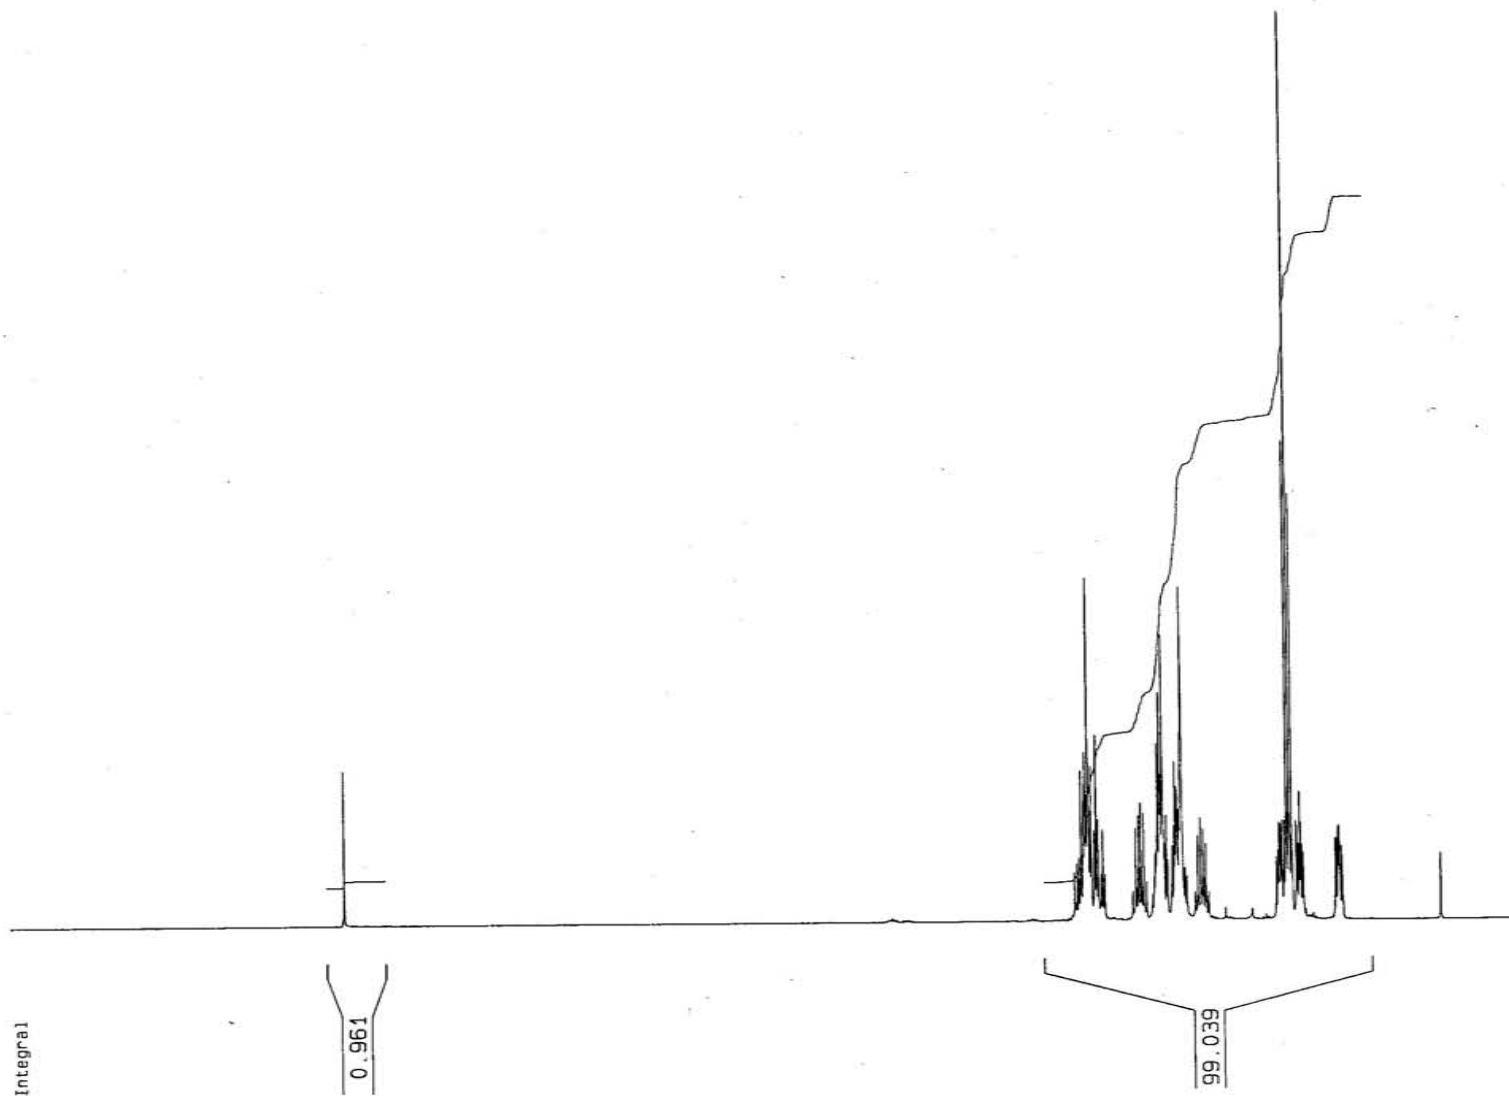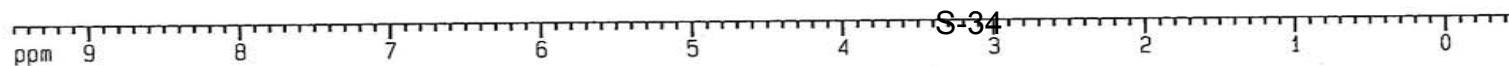

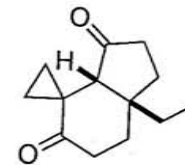

19

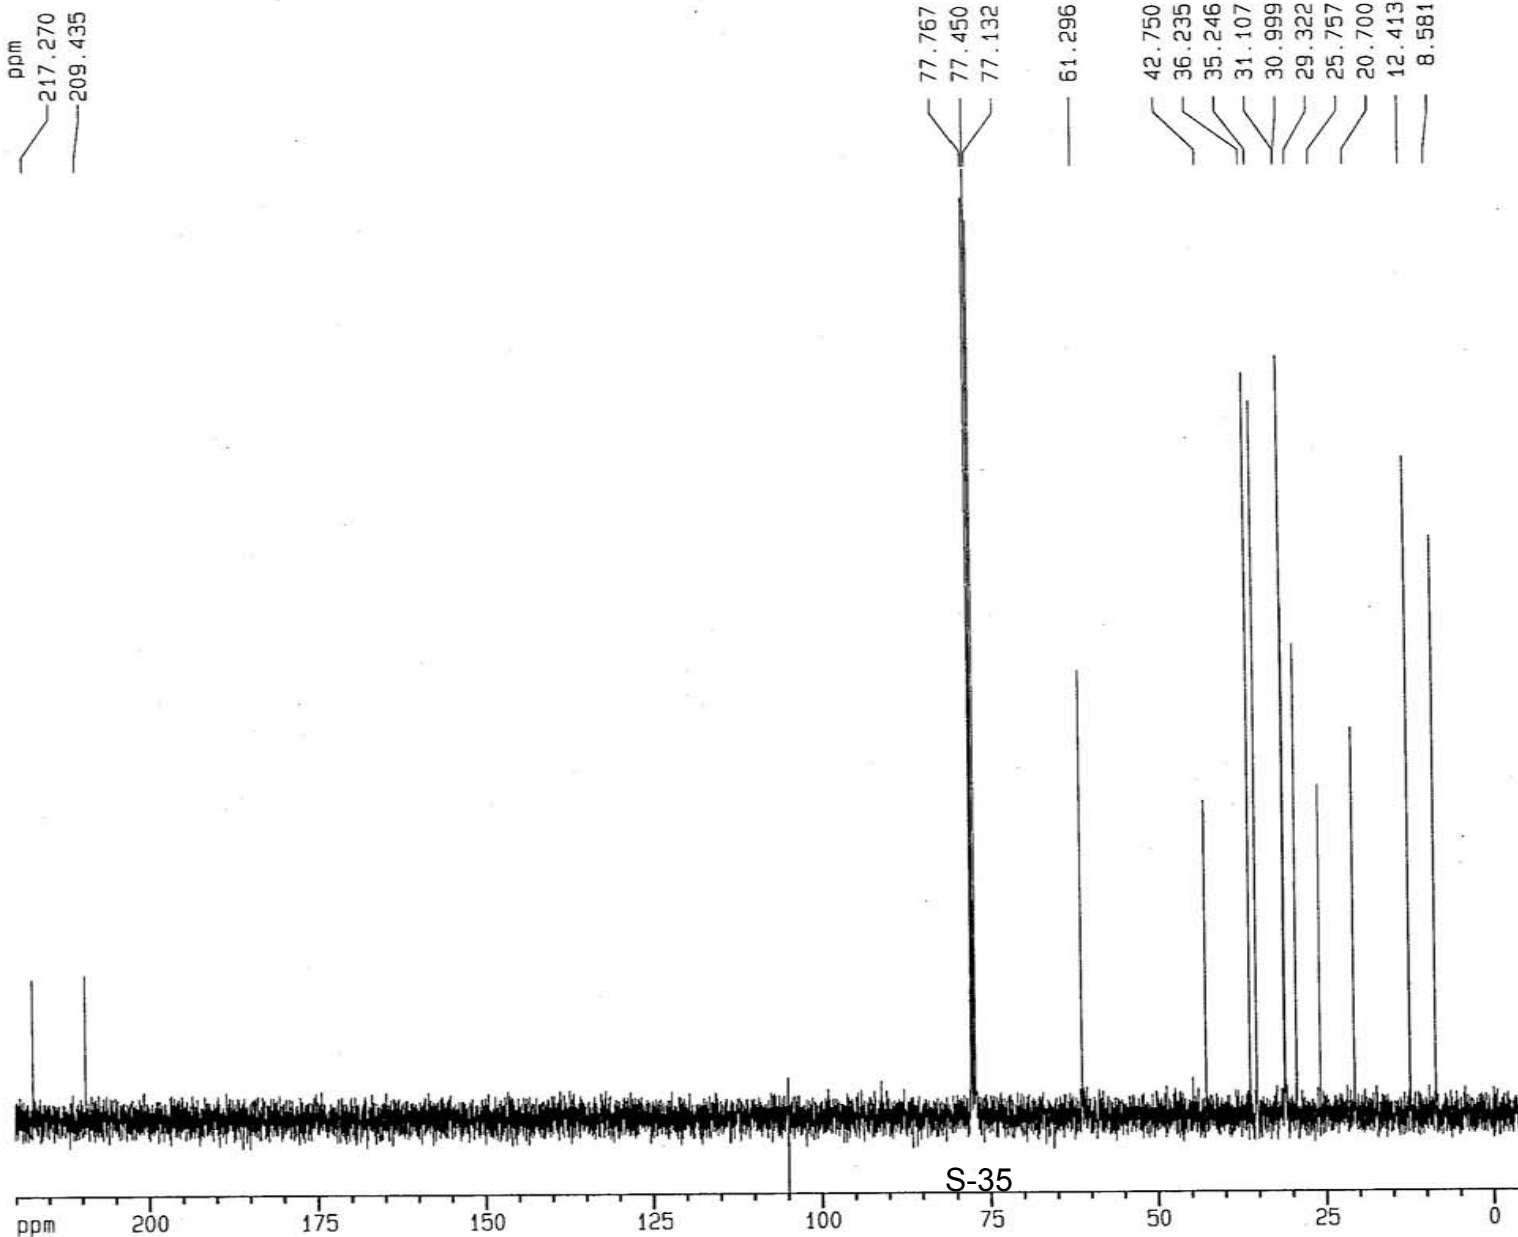

Current Data Parameters  
 NAME ks3.097  
 EXPNO 2  
 PROCNO 1

F2 - Acquisition Parameters  
 Date\_ 970423  
 Time 12.45  
 INSTRUM drx400  
 PROBHD 5 mm Multinu  
 PULPROG zgpg30  
 TD 65536  
 SOLVENT CDCl3  
 NS 256  
 DS 2  
 SMH 23640.662 Hz  
 FIDRES 0.360728 Hz  
 AQ 1.3861364 sec  
 RG 32768  
 DW 21.150 usec  
 DE 4.50 usec  
 TE 300.0 K  
 d11 0.0300000 sec  
 d12 0.0000200 sec  
 PL13 18.00 dB  
 D1 0.05000000 sec  
 CPDPRG2 waltz16  
 PCPD2 100.00 usec  
 SF02 400.1316005 MHz  
 NUC2 13C  
 PL2 -6.00 dB  
 PL12 18.00 dB  
 P1 6.90 usec  
 DE 4.50 usec  
 SF01 100.6232933 MHz  
 NUC1 13C  
 PL1 -6.00 dB

F2 - Processing parameters  
 SI 32768  
 SF 100.6127290 MHz  
 WDW EM  
 SSB 0  
 LB 1.00 Hz  
 GB 0  
 PC 1.40

1D NMR plot parameters  
 CX 20.00 cm  
 F1P 220.000 ppm  
 F1 22134.80 Hz  
 F2P -5.000 ppm  
 F2 -503.07 Hz  
 PPMCM 11.25000 ppm/cm  
 HZCM 1131.89319 Hz/cm

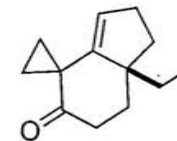

20

Current Data Parameters  
 NAME raj-3-84-prdt  
 EXPNO 1  
 PROCNO 1

F2 - Acquisition Parameters  
 Date\_ 1000217  
 Time 16.12  
 INSTRUM drx400  
 PROBHD 5 mm Multinu  
 PULPROG zg30  
 TD 32768  
 SOLVENT CDC13  
 NS 16  
 DS 2  
 SWH 4789.272 Hz  
 FIDRES 0.146157 Hz  
 AQ 3.4210291 sec  
 RG 64  
 DW 104.400 usec  
 DE 4.50 usec  
 TE 300.0 K  
 D1 1.00000000 sec  
 P1 7.70 usec  
 DE 4.50 usec  
 SFO1 400.1320007 MHz  
 NUC1 1H  
 PL1 -6.00 dB

F2 - Processing parameters  
 SI 16384  
 SF 400.1300047 MHz  
 WDW EM  
 SSB 0  
 LB 0.30 Hz  
 GB 0  
 PC 1.00

1D NMR plot parameters  
 CX 20.00 cm  
 F1P 10.167 ppm  
 F1 4068.20 Hz  
 F2P -0.317 ppm  
 F2 -127.02 Hz  
 PPMCM 0.52423 ppm/cm  
 HZCM 209.76091 Hz/cm

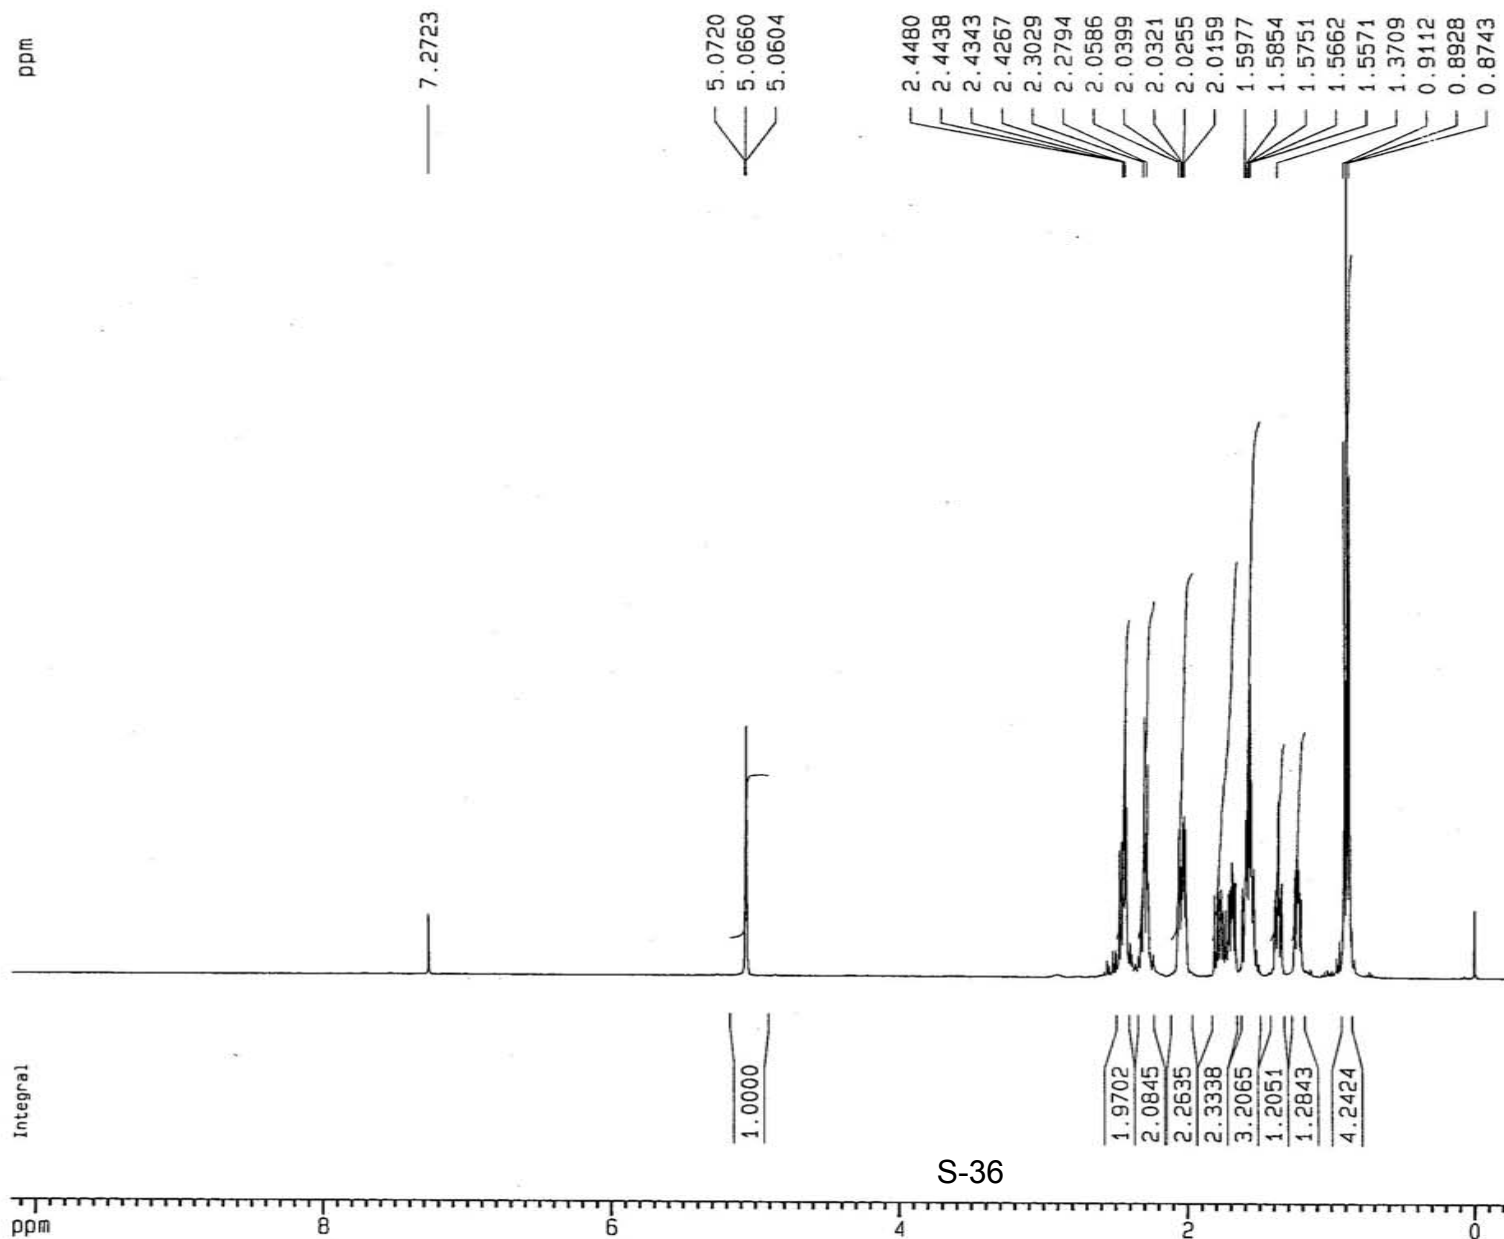

S-36

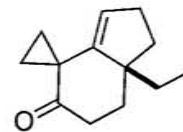

20

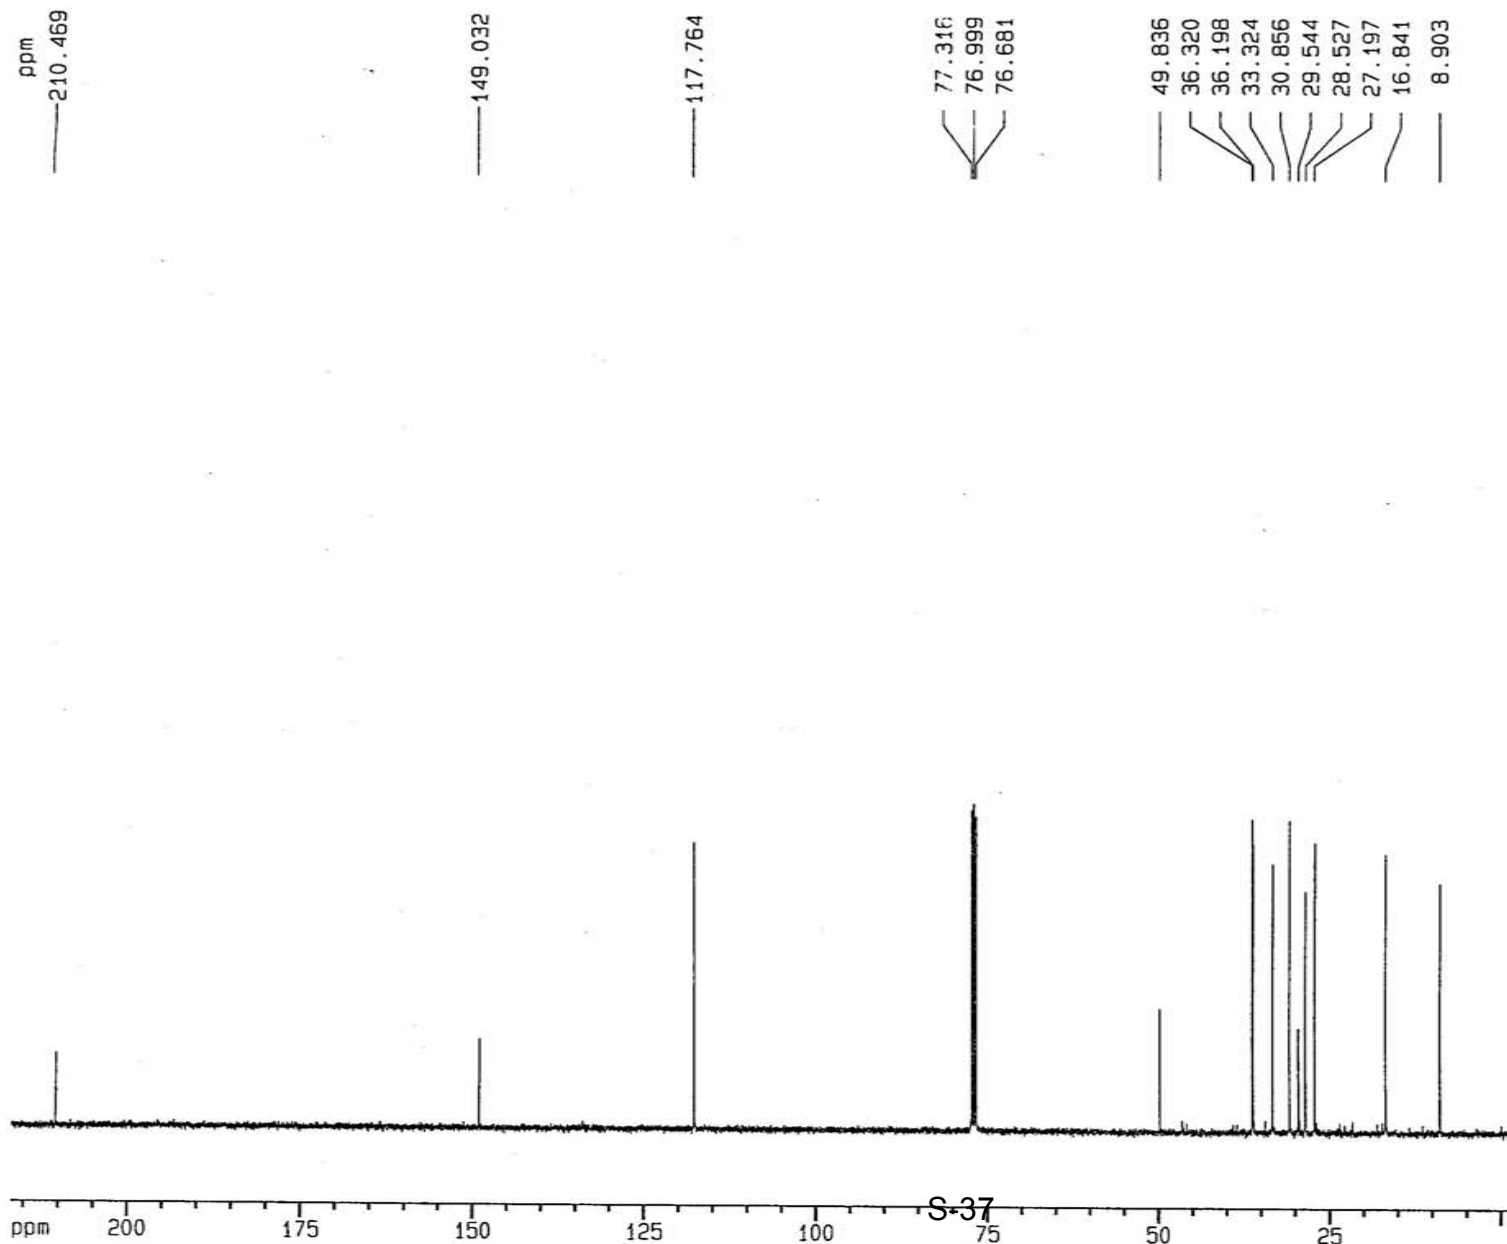

S-37

Current Data Parameters  
 NAME raj-3-B4-prdt  
 EXPNO 2  
 PROCNO 1

F2 - Acquisition Parameters  
 Date\_ 1000217  
 Time 16.06  
 INSTRUM drx400  
 PROBHD 5 mm Multinu  
 PULPROG zgpg30  
 TD 65536  
 SOLVENT CDCl3  
 NS 1024  
 DS 2  
 SWH 23148.148 Hz  
 FIDRES 0.353213 Hz  
 AQ 1.4156276 sec  
 RG 1024  
 DW 21.600 usec  
 DE 4.50 usec  
 TE 300.0 K  
 r11 0.0300000 sec  
 d12 0.0000200 sec  
 PL13 18.00 dB  
 D1 0.05000000 sec  
 CPDPRG2 waltz16  
 PCPD2 100.00 usec  
 SF02 400.1316005 MHz  
 NUC2 1H  
 PL2 -6.00 dB  
 PL12 18.00 dB  
 P1 6.90 usec  
 DE 4.50 usec  
 SF01 100.6232933 MHz  
 NUC1 13C  
 PL1 -6.00 dB

F2 - Processing parameters  
 SI 32768  
 SF 100.6127727 MHz  
 WDW EM  
 SSB 0  
 LB 1.00 Hz  
 GB 0  
 PC 1.40

1D NMR plot parameters  
 CX 20.00 cm  
 F1P 216.725 ppm  
 F1 21805.33 Hz  
 F2P -2.285 ppm  
 F2 -229.92 Hz  
 PPMCM 10.95053 ppm/cm  
 HZCM 1101.76270 Hz/cm

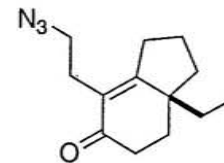

21

Current Data Parameters  
 NAME raj-3-80-crud  
 EXPNO 1  
 PROCNO 1

F2 - Acquisition Parameters

Date\_ 1000204  
 Time 12.52  
 INSTRUM drx400  
 PROBHD 5 mm Multinu  
 PULPROG zg30  
 TD 32768  
 SOLVENT CDC13  
 NS 16  
 DS 2  
 SWH 4789.272 Hz  
 FIDRES 0.146157 Hz  
 AQ 3.4210291 sec  
 RG 64  
 DW 104.400 usec  
 DE 4.50 usec  
 TE 300.0 K  
 D1 1.00000000 sec  
 P1 7.70 usec  
 DE 4.50 usec  
 SFO1 400.1320007 MHz  
 NUC1 1H  
 PL1 -6.00 dB

F2 - Processing parameters

SI 16384  
 SF 400.1300021 MHz  
 WDW EM  
 SSB 0  
 LB 0.30 Hz  
 GB 0  
 PC 1.00

1D NMR plot parameters

CX 20.00 cm  
 F1P 10.108 ppm  
 F1 4044.36 Hz  
 F2P -0.354 ppm  
 F2 -141.54 Hz  
 PPMCM 0.52307 ppm/cm  
 HZCM 209.29495 Hz/cm

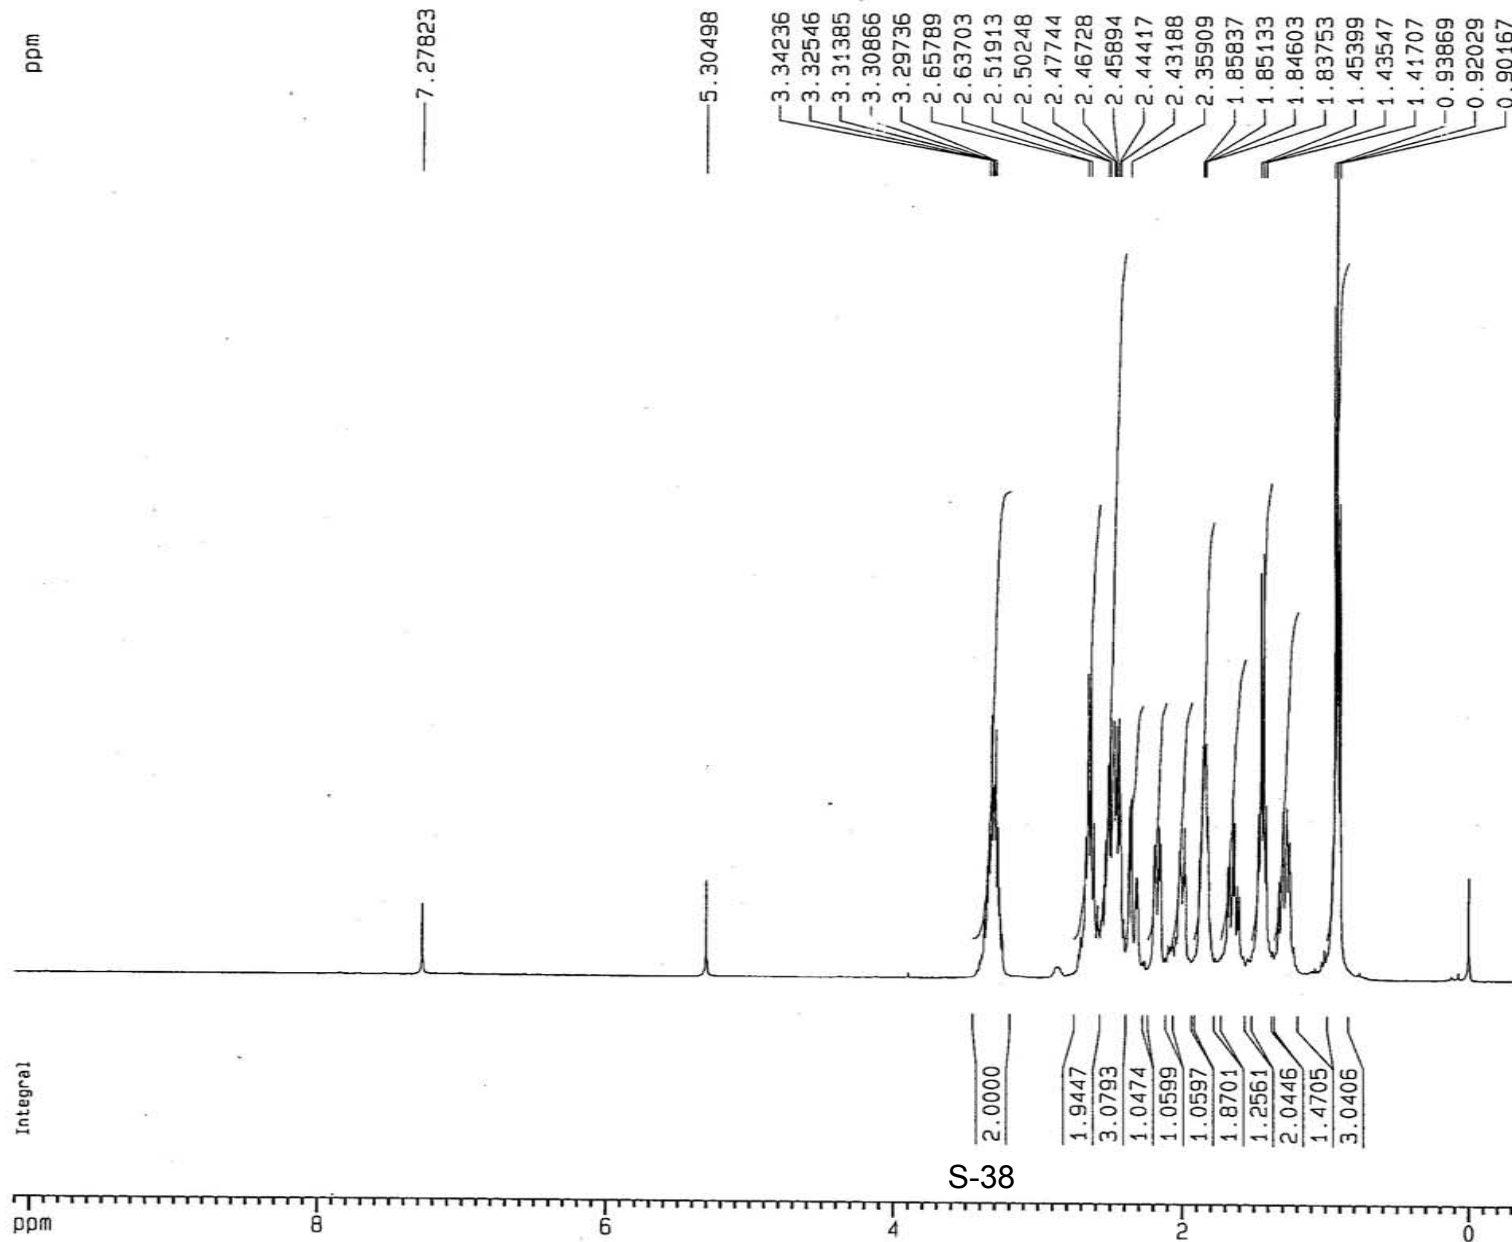

S-38

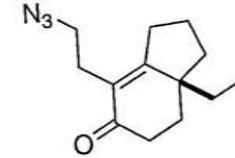

21

Current Data Parameters  
 NAME raj-3-80-crd  
 EXPNO 2  
 PROCNO 1

F2 - Acquisition Parameters  
 Date\_ 1000204  
 Time 15.19  
 INSTRUM drx400  
 PROBHD 5 mm Multinu  
 PULPROG zgpg30  
 TD 65536  
 SOLVENT CDCl3  
 NS 802  
 DS 2  
 SWH 23148.148 Hz  
 FIDRES 0.353213 Hz  
 AQ 1.4156276 sec  
 RG 512  
 DW 21.600 usec  
 DE 4.50 usec  
 TE 300.0 K  
 d11 0.030000 sec  
 d12 0.000000 sec  
 PL13 10.00 dB  
 D1 0.05000000 sec  
 CPDPRG2 waltz16  
 PCPD2 100.00 usec  
 SF02 400.1316005 MHz  
 NUC2 1H  
 PL2 -6.00 dB  
 PL12 18.00 dB  
 P1 6.90 usec  
 DE 4.50 usec  
 SF01 100.6232933 MHz  
 NUC1 13C  
 PL1 -6.00 dB

F2 - Processing parameters  
 SI 32768  
 SF 100.6127741 MHz  
 WDW EM  
 SSB 0  
 LB 1.00 Hz  
 GB 0  
 PC 1.40

1D NMR plot parameters  
 CX 20.00 cm  
 F1P 210.702 ppm  
 F1 21199.33 Hz  
 F2P -3.236 ppm  
 F2 -325.62 Hz  
 PPMCM 10.69693 ppm/cm  
 HZCM 1076.24780 Hz/cm

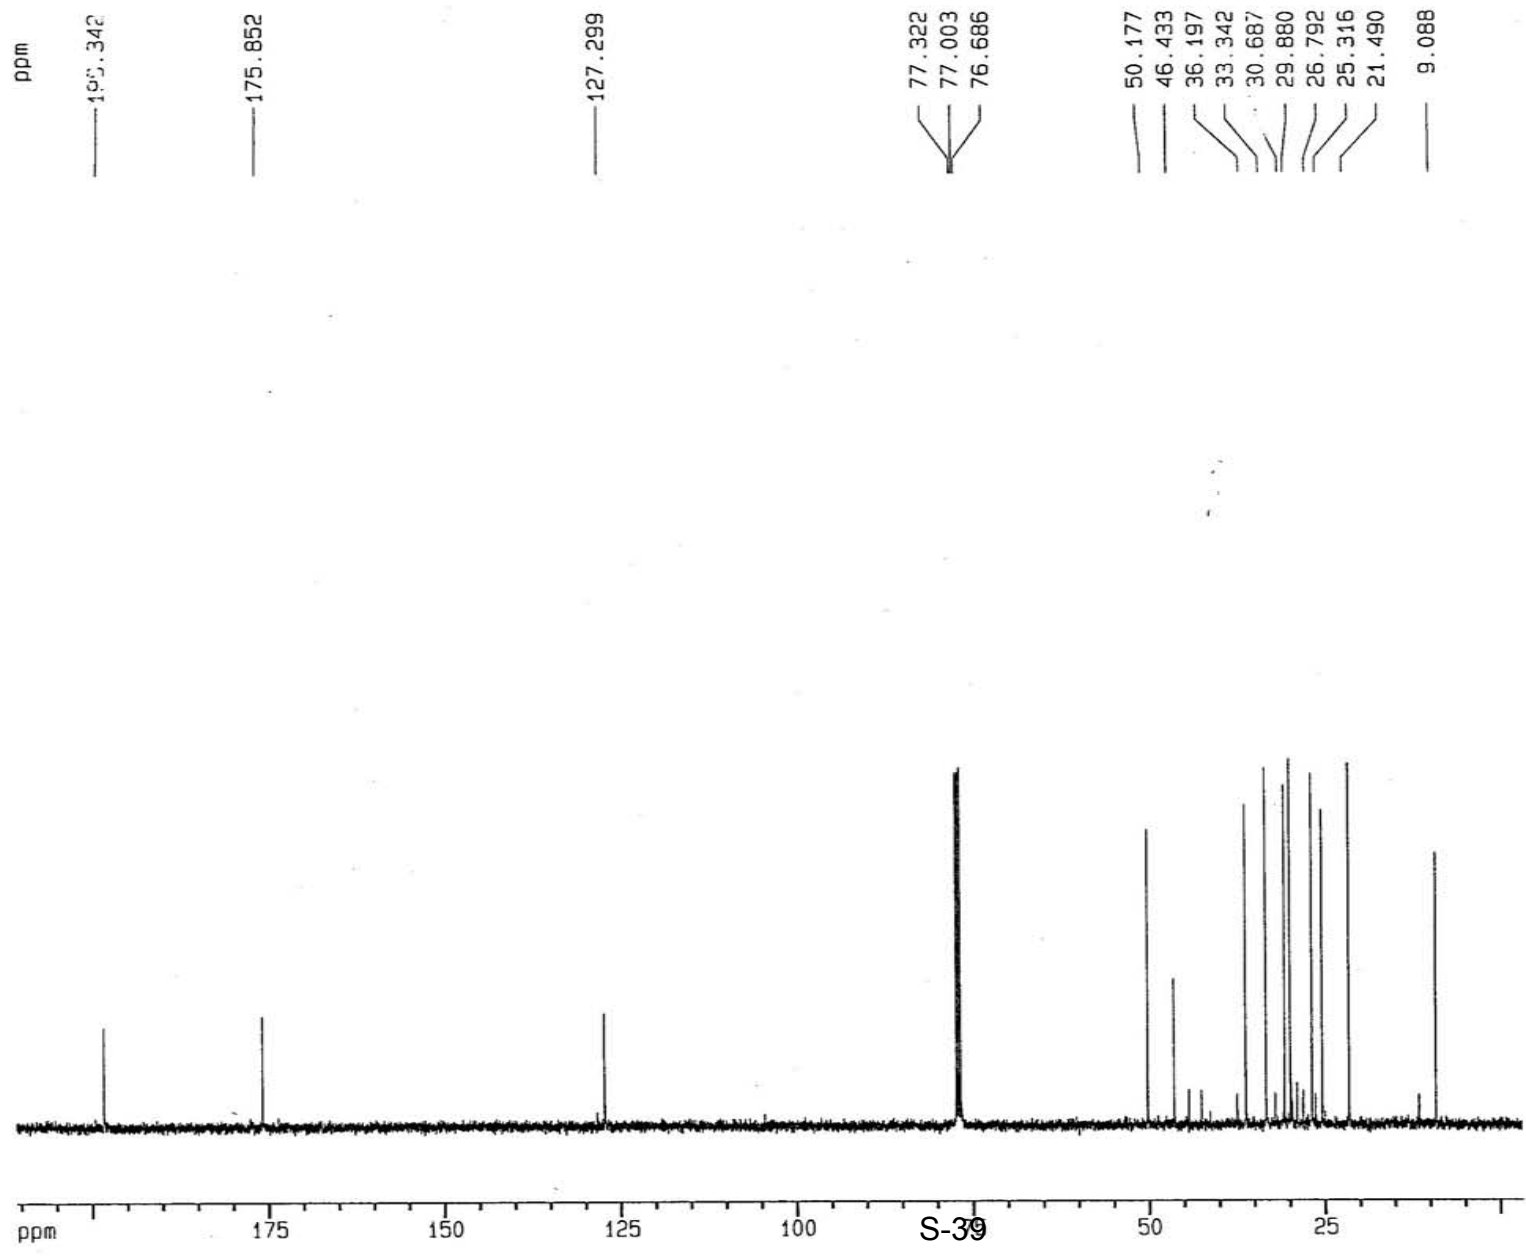

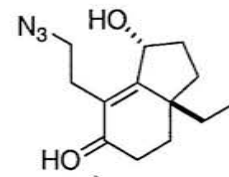

22

Current Data Parameters  
 NAME raj-3-83-prdt  
 EXPNO 1  
 PROCNO 1

F2 - Acquisition Parameters  
 Date\_ 1000209  
 Time 17.39  
 INSTRUM drx400  
 PROBHD 5 mm Multinu  
 PULPROG zg30  
 TD 32768  
 SOLVENT CDCl3  
 NS 16  
 DS 2  
 SWH 4789.272 Hz  
 FIDRES 0.146157 Hz  
 AQ 3.4210291 sec  
 RG 456.1  
 DW 104.400 usec  
 DE 4.50 usec  
 TE 300.0 K  
 D1 1.0000000 sec  
 P1 7.70 usec  
 DE 4.50 usec  
 SF01 400.1320007 MHz  
 NUC1 1H  
 PL1 -6.00 dB

F2 - Processing parameters  
 SI 16384  
 SF 400.1300074 MHz  
 WDW EM  
 SSB 0  
 LB 0.30 Hz  
 GB 0  
 PC 1.00

1D NMR plot parameters  
 CX 20.00 cm  
 F1P 10.129 ppm  
 F1 4052.86 Hz  
 F2P -0.333 ppm  
 F2 -133.29 Hz  
 PPMCM 0.52310 ppm/cm  
 HZCM 209.30728 Hz/cm

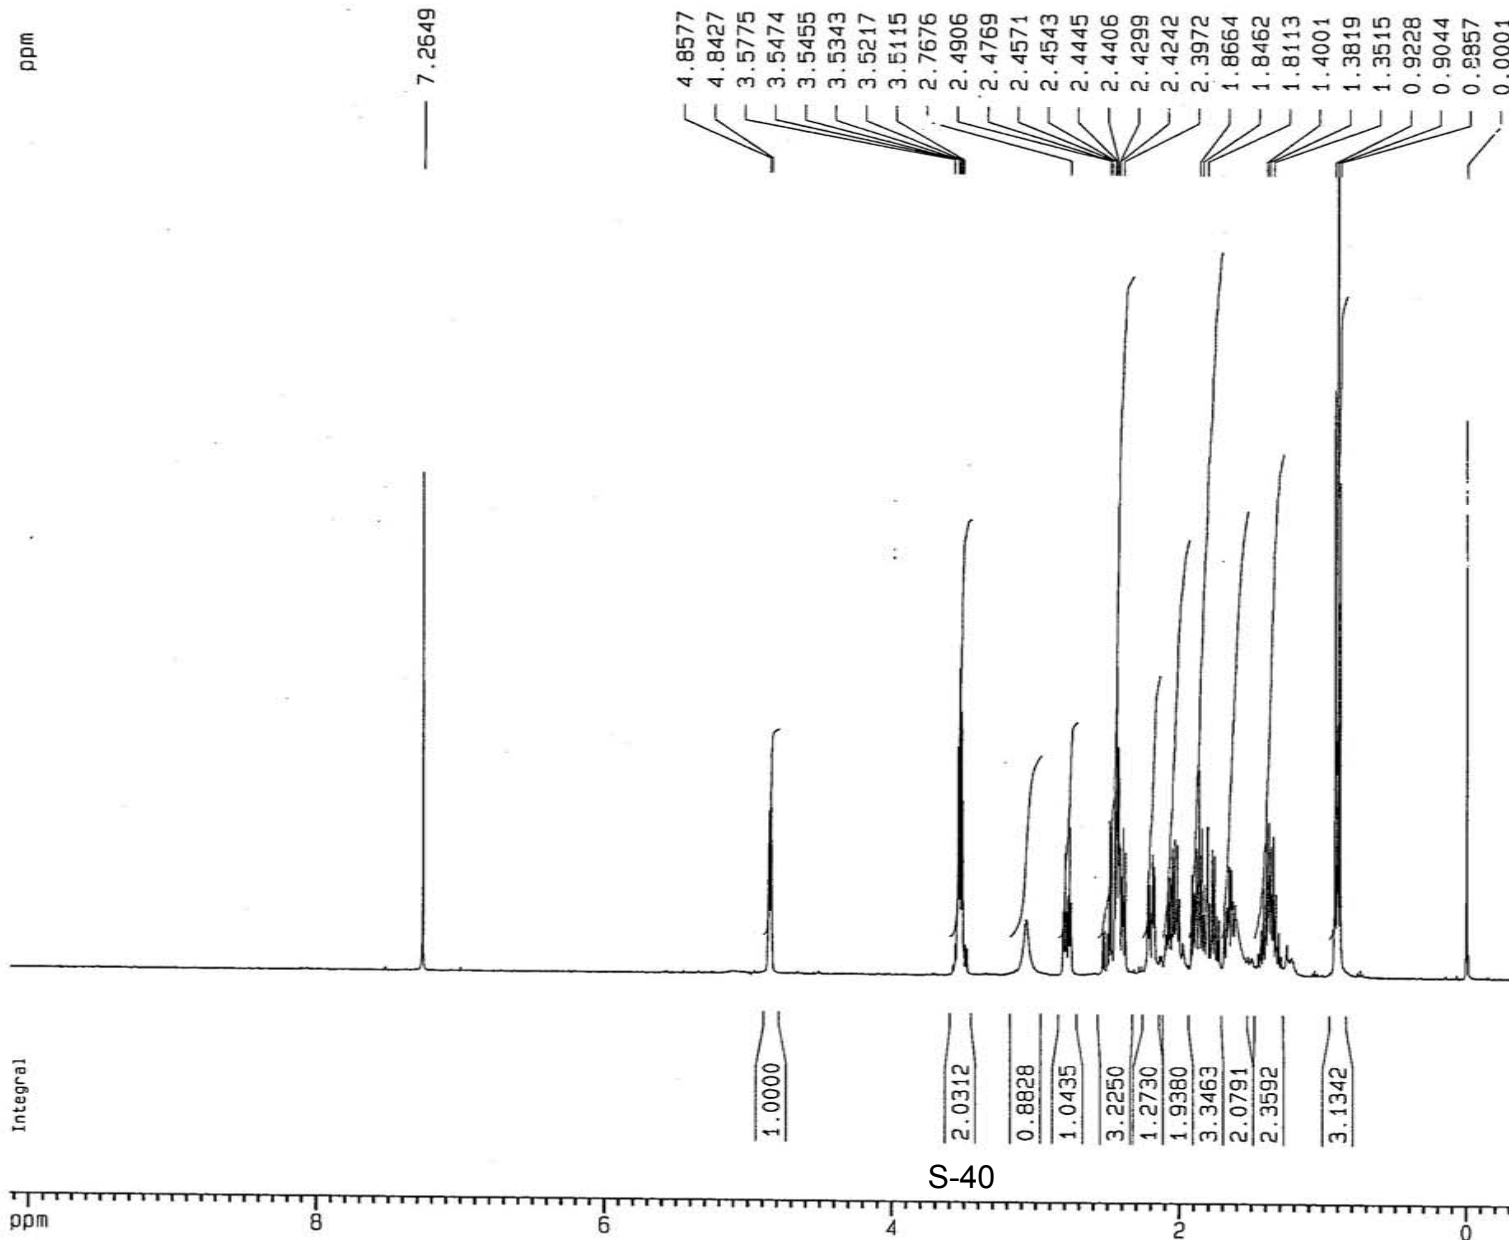



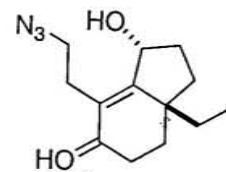

22

Current Data Parameters  
 NAME raj-3-83-prdt  
 EXPNO 2  
 PROCNO 1

F2 - Acquisition Parameters

Date\_ 1000209  
 Time 18.06  
 INSTRUM drx400  
 PROBHD 5 mm Multinu  
 PULPROG zgpg30  
 TD 65536  
 SOLVENT CDCl3  
 NS 1024  
 DS 2  
 SWH 23148.148 Hz  
 FIDRES 0.353213 Hz  
 AQ 1.4156276 sec  
 RG 4096  
 DW 21.600 usec  
 DE 4.50 usec  
 TE 300.0 K  
 d11 0.0300000 sec  
 d12 0.0000200 sec  
 PL13 18.00 dB  
 D1 0.0500000 sec  
 CPDPRG2 waltz16  
 PCPD2 100.00 usec  
 SF02 400.1316005 MHz  
 NUC2 1H  
 PL2 -6.00 dB  
 PL12 18.00 dB  
 P1 6.90 usec  
 DE 4.50 usec  
 SF01 100.6232933 MHz  
 NUC1 13C  
 PL1 -6.00 dB

F2 - Processing parameters

SI 32768  
 SF 100.6127706 MHz  
 NDM EM  
 SSB 0  
 LB 1.00 Hz  
 GB 0  
 PC 1.40

1D NMR plot parameters

CX 20.00 cm  
 F1P 213.613 ppm  
 F1 21492.19 Hz  
 F2P -2.508 ppm  
 F2 -252.39 Hz  
 PPMCM 10.80607 ppm/cm  
 HZCM 1087.22876 Hz/cm

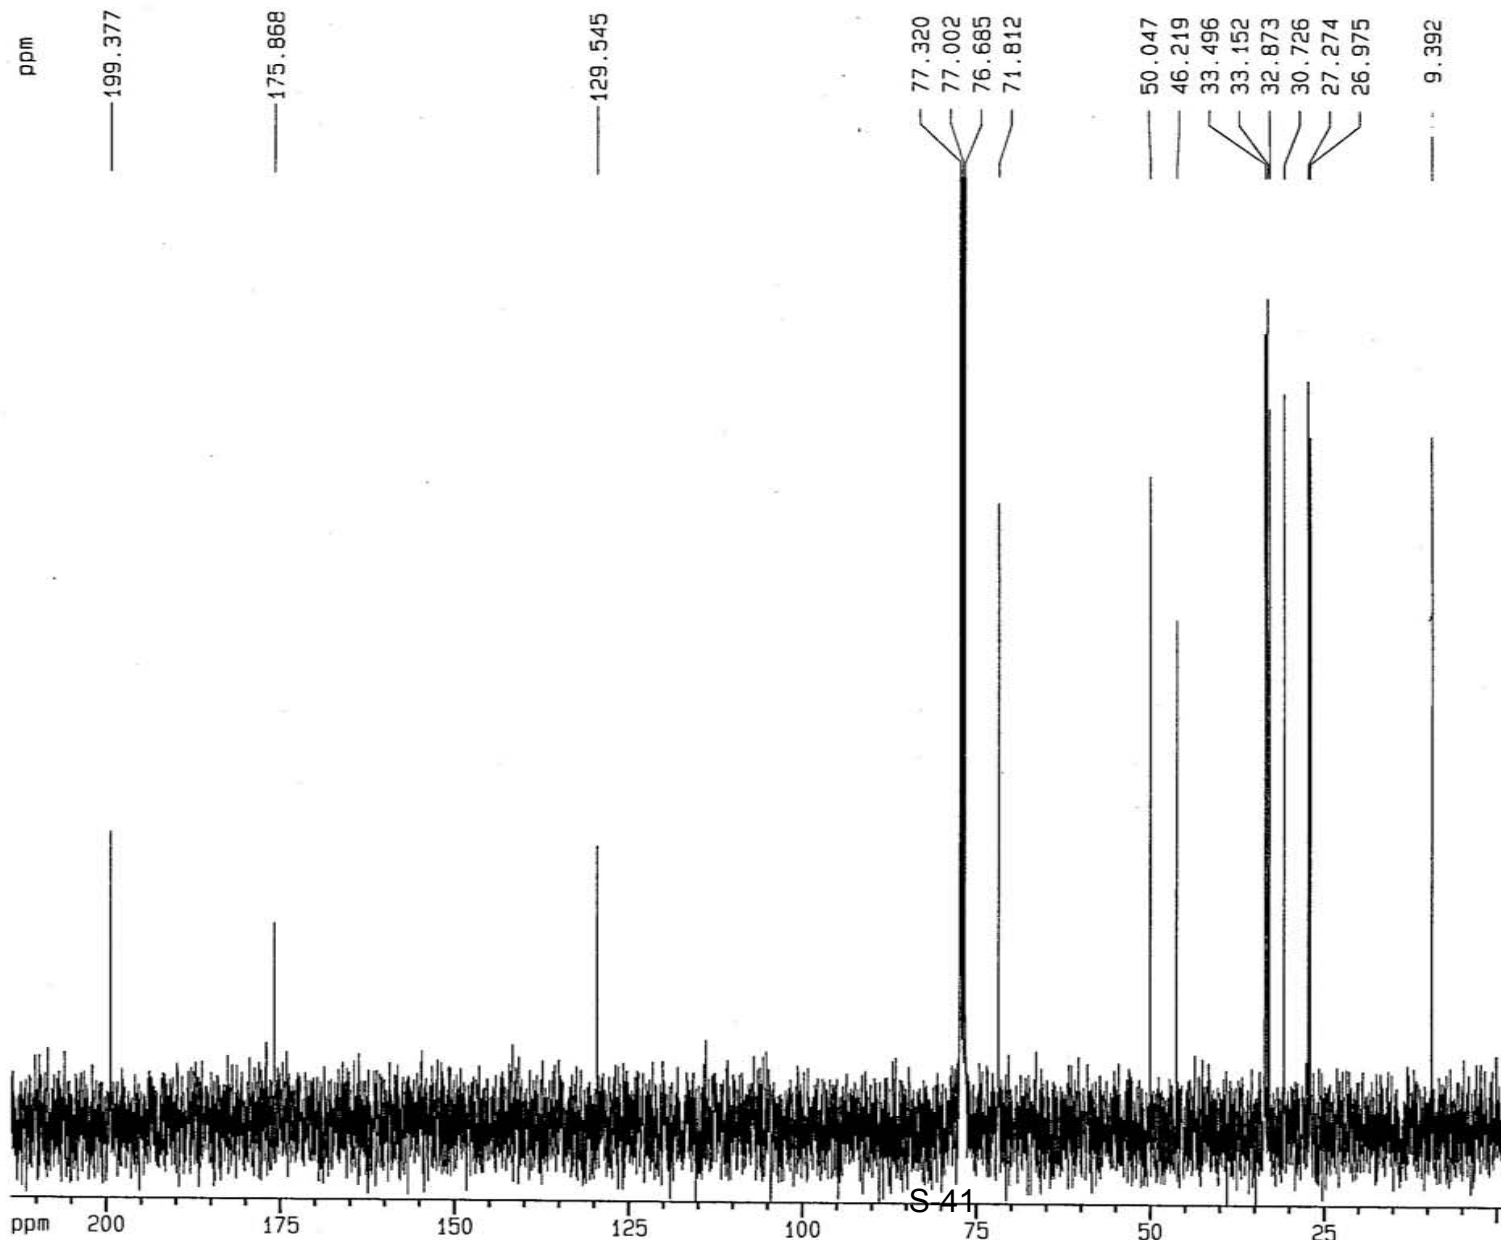

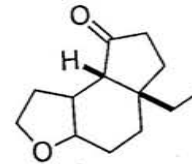

24

Current Data Parameters

NAME ks3.266  
 EXPNO 1  
 PROCNO 1

F2 - Acquisition Parameters

Date\_ 970414  
 Time 11.58  
 INSTRUM drx400  
 PROBHD 5 mm Multinu  
 PULPROG zg30  
 TD 32768  
 SOLVENT CDCl3  
 NS 16  
 DS 2  
 SWH 4789.272 Hz  
 FIDRES 0.146157 Hz  
 AQ 3.4210291 sec  
 RG 128  
 DW 104.400 usec  
 DE 4.50 usec  
 TE 300.0 K  
 D1 1.00000000 sec  
 P1 7.70 usec  
 DE 4.50 usec  
 SFO1 400.1320007 MHz  
 NUC1 1H  
 PL1 -6.00 dB

F2 - Processing parameters

SI 16384  
 SF 400.1300000 MHz  
 WDW EM  
 SSB 0  
 LB 0.30 Hz  
 GB 0  
 PC 1.00

1D NMR plot parameters

CX 20.00 cm  
 F1P 9.500 ppm  
 F1 3801.24 Hz  
 F2P -0.500 ppm  
 F2 -200.07 Hz  
 PPMCM 0.50000 ppm/cm  
 HZCM 200.06500 Hz/cm

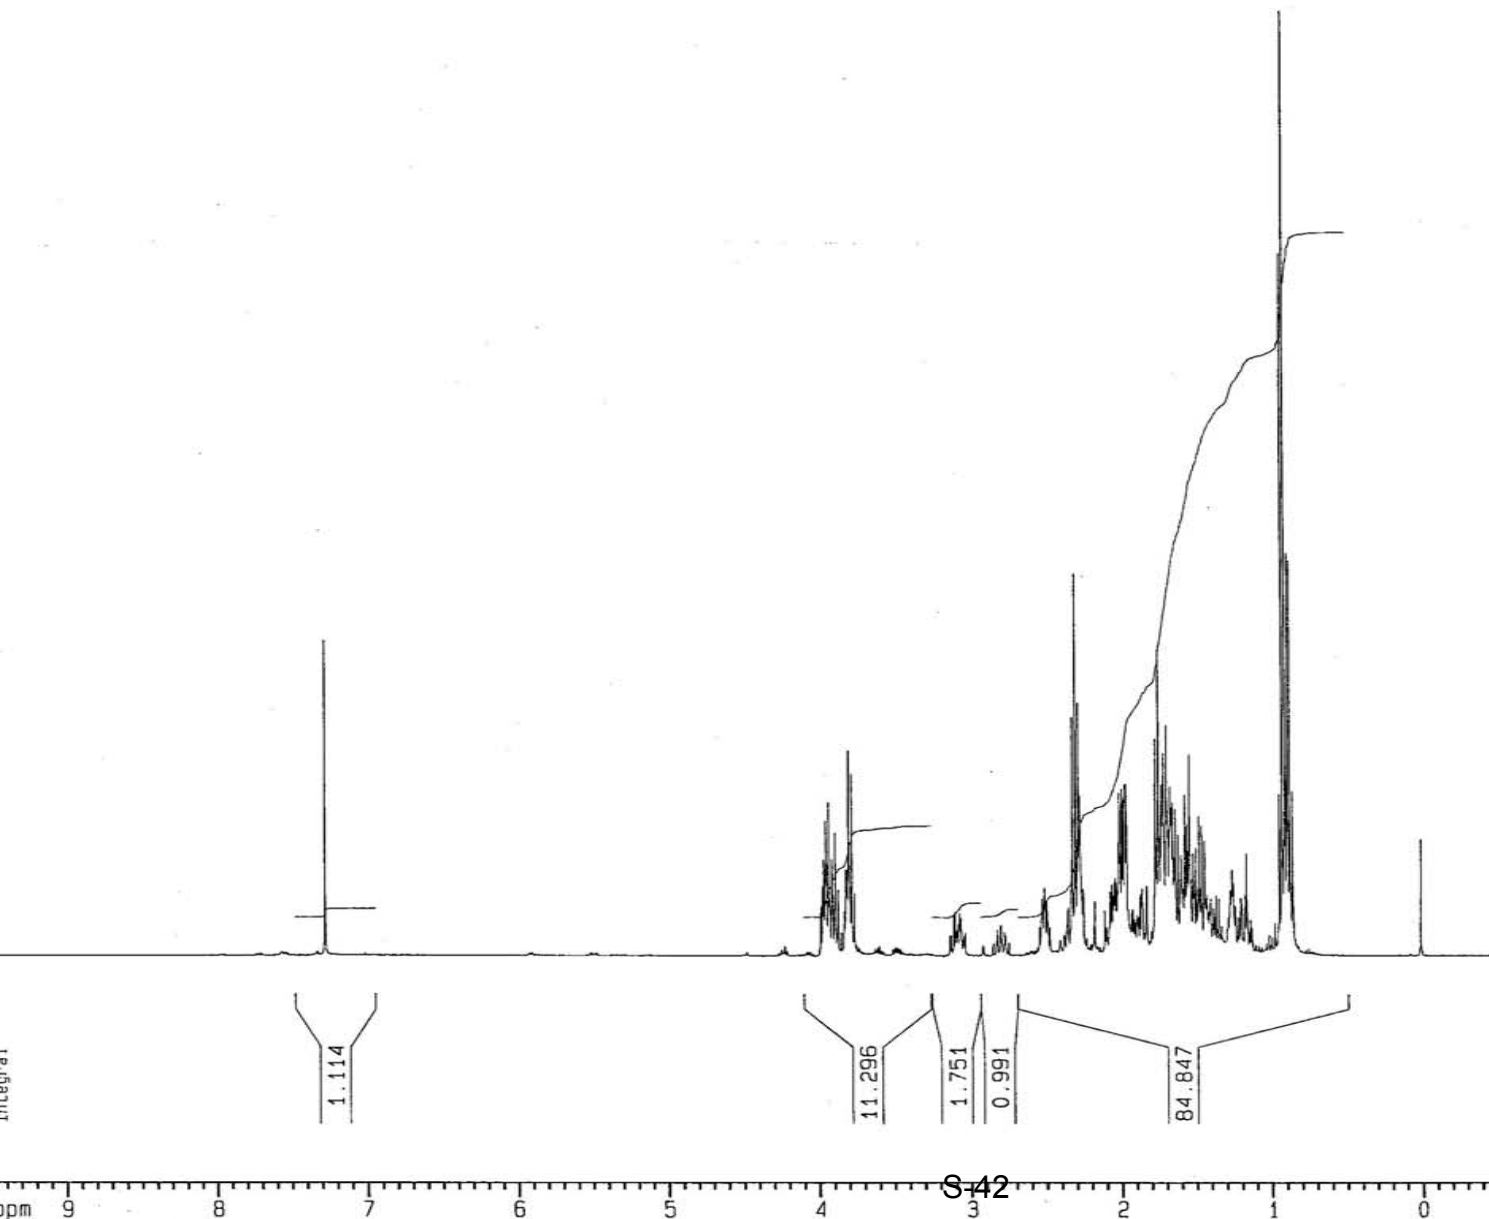

S-42

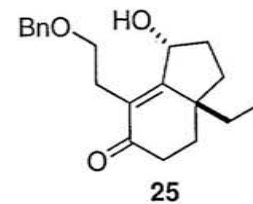

Current Data Parameters  
 NAME raj-2-218-prdt  
 EXPNO 1  
 PROCNO 1

F2 - Acquisition Parameters

Date\_ 990715  
 Time 11.09  
 INSTRUM drx400  
 PROBHD 5 mm Multinu  
 PULPROG zg30  
 TD 32768  
 SOLVENT CDC13  
 NS 16  
 DS 2  
 SWH 4789.272 Hz  
 FIDRES 0.146157 Hz  
 AQ 3.4210291 sec  
 RG 64  
 DW 104.400 usec  
 DE 4.50 usec  
 TE 300.0 K  
 D1 1.00000000 sec  
 P1 7.70 usec  
 DE 4.50 usec  
 SFO1 400.1320007 MHz  
 NUC1 1H  
 PL1 -6.00 dB

F2 - Processing parameters

SI 16384  
 SF 400.1300041 MHz  
 WDW EM  
 SSB 0  
 LB 0.30 Hz  
 GB 0  
 PC 1.00

1D NMR plot parameters

CX 20.00 cm  
 F1P 7.708 ppm  
 F1 3084.14 Hz  
 F2P -0.161 ppm  
 F2 -64.53 Hz  
 PPMCM 0.39346 ppm/cm  
 HZCM 157.43359 Hz/cm

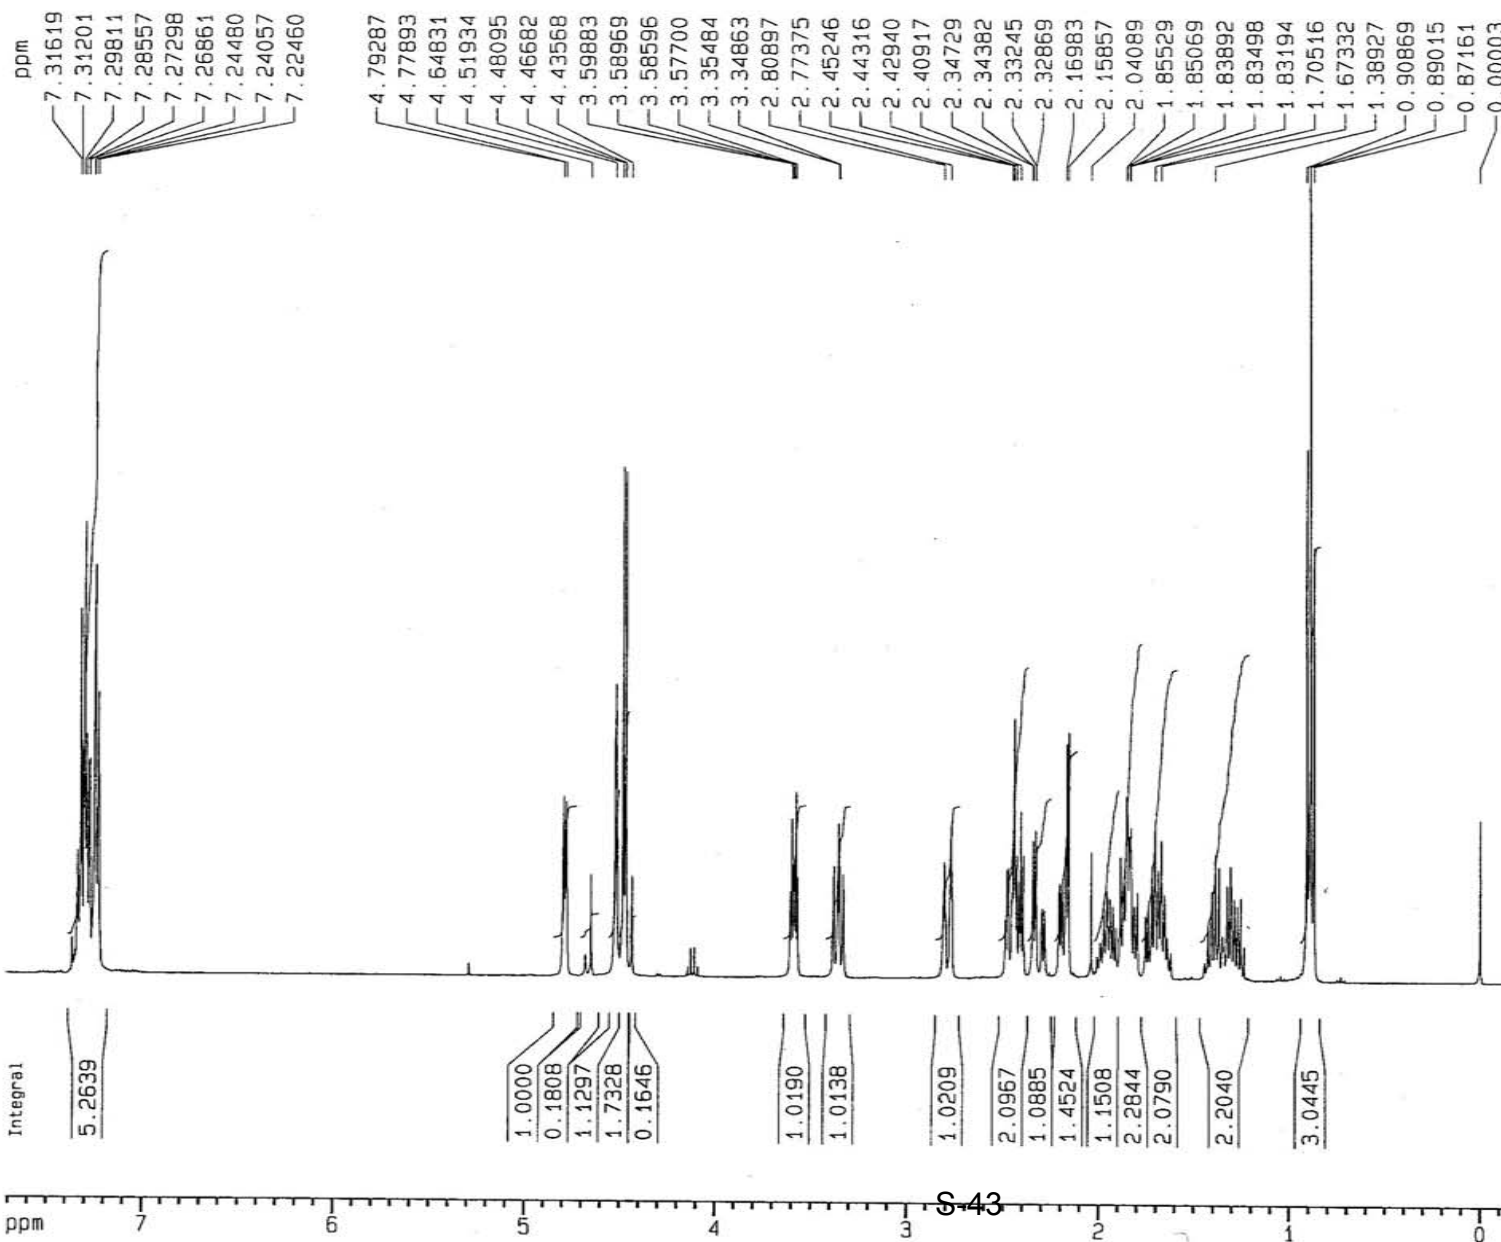

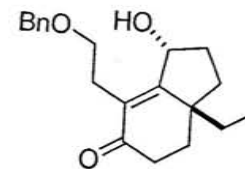

25

Current Data Parameters  
 NAME raj-2-218-prdt  
 EXPNO 2  
 PROCNO 1

F2 - Acquisition Parameters

Date\_ 990715  
 Time 16.30  
 INSTRUM drx400  
 PROBHD 5 mm Multinu  
 PULPROG zgpg30  
 TD 65536  
 SOLVENT CDC13  
 NS 1024  
 DS 2  
 SWH 23148.148 Hz  
 FIDRES 0.353213 Hz  
 AQ 1.4156276 sec  
 RG 512  
 DW 21.600 usec  
 DE 4.50 usec  
 TE 300.0 K  
 d11 0.0300000 sec  
 d12 0.0000200 sec  
 PL13 18.00 dB  
 D1 0.05000000 sec  
 CPDPRG2 waltz16  
 PCPD2 100.00 usec  
 SFO2 400.1316005 MHz  
 NUC2 1H  
 PL2 -6.00 dB  
 PL12 18.00 dB  
 P1 6.90 usec  
 DE 4.50 usec  
 SFO1 100.6232933 MHz  
 NUC1 13C  
 PL1 -6.00 dB

F2 - Processing parameters

SI 32768  
 SF 100.6127777 MHz  
 WDW EM  
 SSB 0  
 LB 1.00 Hz  
 GB 0  
 PC 1.40

1D NMR plot parameters

CX 20.00 cm  
 F1P 215.161 ppm  
 F1 21647.98 Hz  
 F2P -3.714 ppm  
 F2 -373.68 Hz  
 PPMCM 10.94377 ppm/cm  
 HZCM 1101.08313 Hz/cm

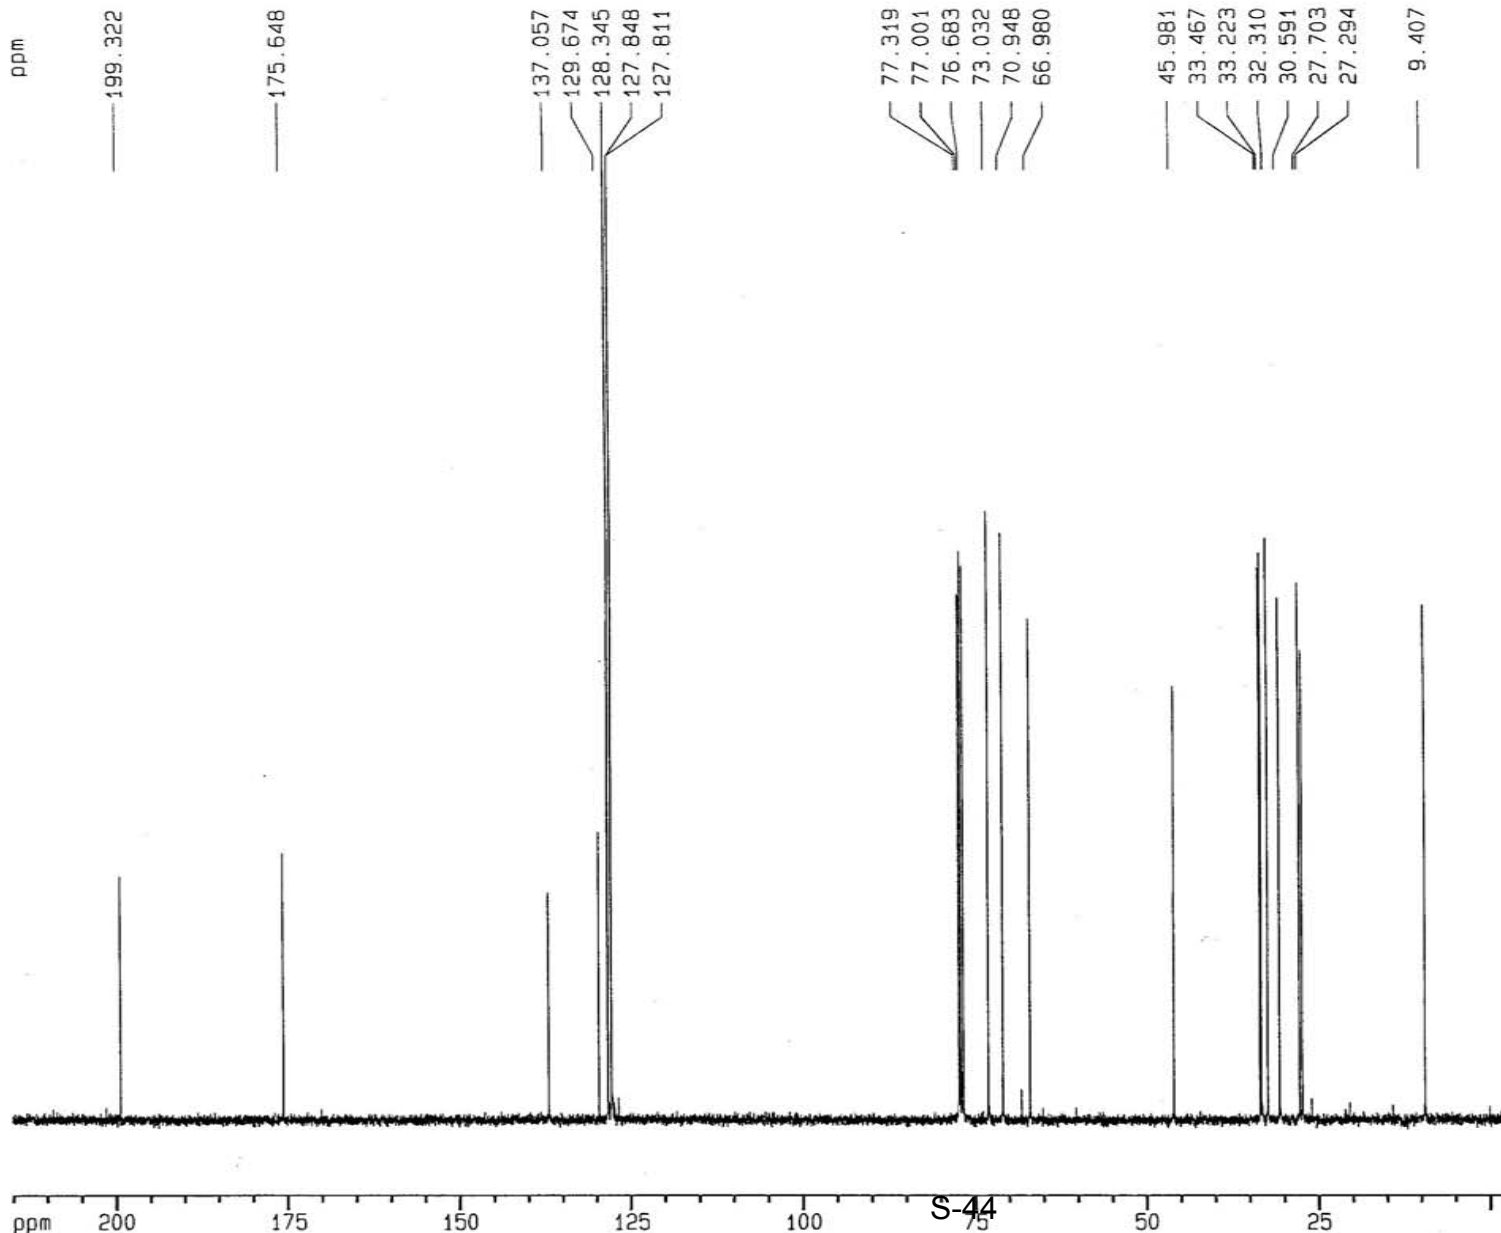

S-44

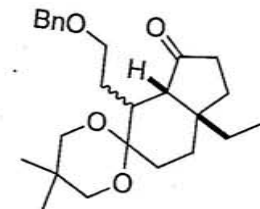

CURR 26  
 NAME  
 EXPNO 1  
 PROCNO 1

**F2 - Acquisition Parameters**  
 Date\_ 990604  
 Time 11.44  
 INSTRUM drx400  
 PROBHD 5 mm Multinu  
 PULPROG zg30  
 TD 32768  
 SOLVENT CDCl3  
 NS 16  
 DS 2  
 SWH 4789.272 Hz  
 FIDRES 0.146157 Hz  
 AQ 3.4210291 sec  
 RG 64  
 DW 104.400 usec  
 DE 4.50 usec  
 TE 300.0 K  
 D1 1.00000000 sec  
 P1 7.70 usec  
 DE 4.50 usec  
 SFO1 400.1320007 MHz  
 NUC1 1H  
 PL1 -6.00 dB

**F2 - Processing parameters**  
 SI 16384  
 SF 400.1300068 MHz  
 WDW EM  
 SSB 0  
 LB 0.30 Hz  
 GB 0  
 PC 1.00

**10 NMR plot parameters**  
 CX 20.00 cm  
 F1P 10.182 ppm  
 F1 4074.21 Hz  
 F2P -0.154 ppm  
 F2 -61.52 Hz  
 PPMCM 0.51680 ppm/cm  
 HZCM 206.78679 Hz/cm

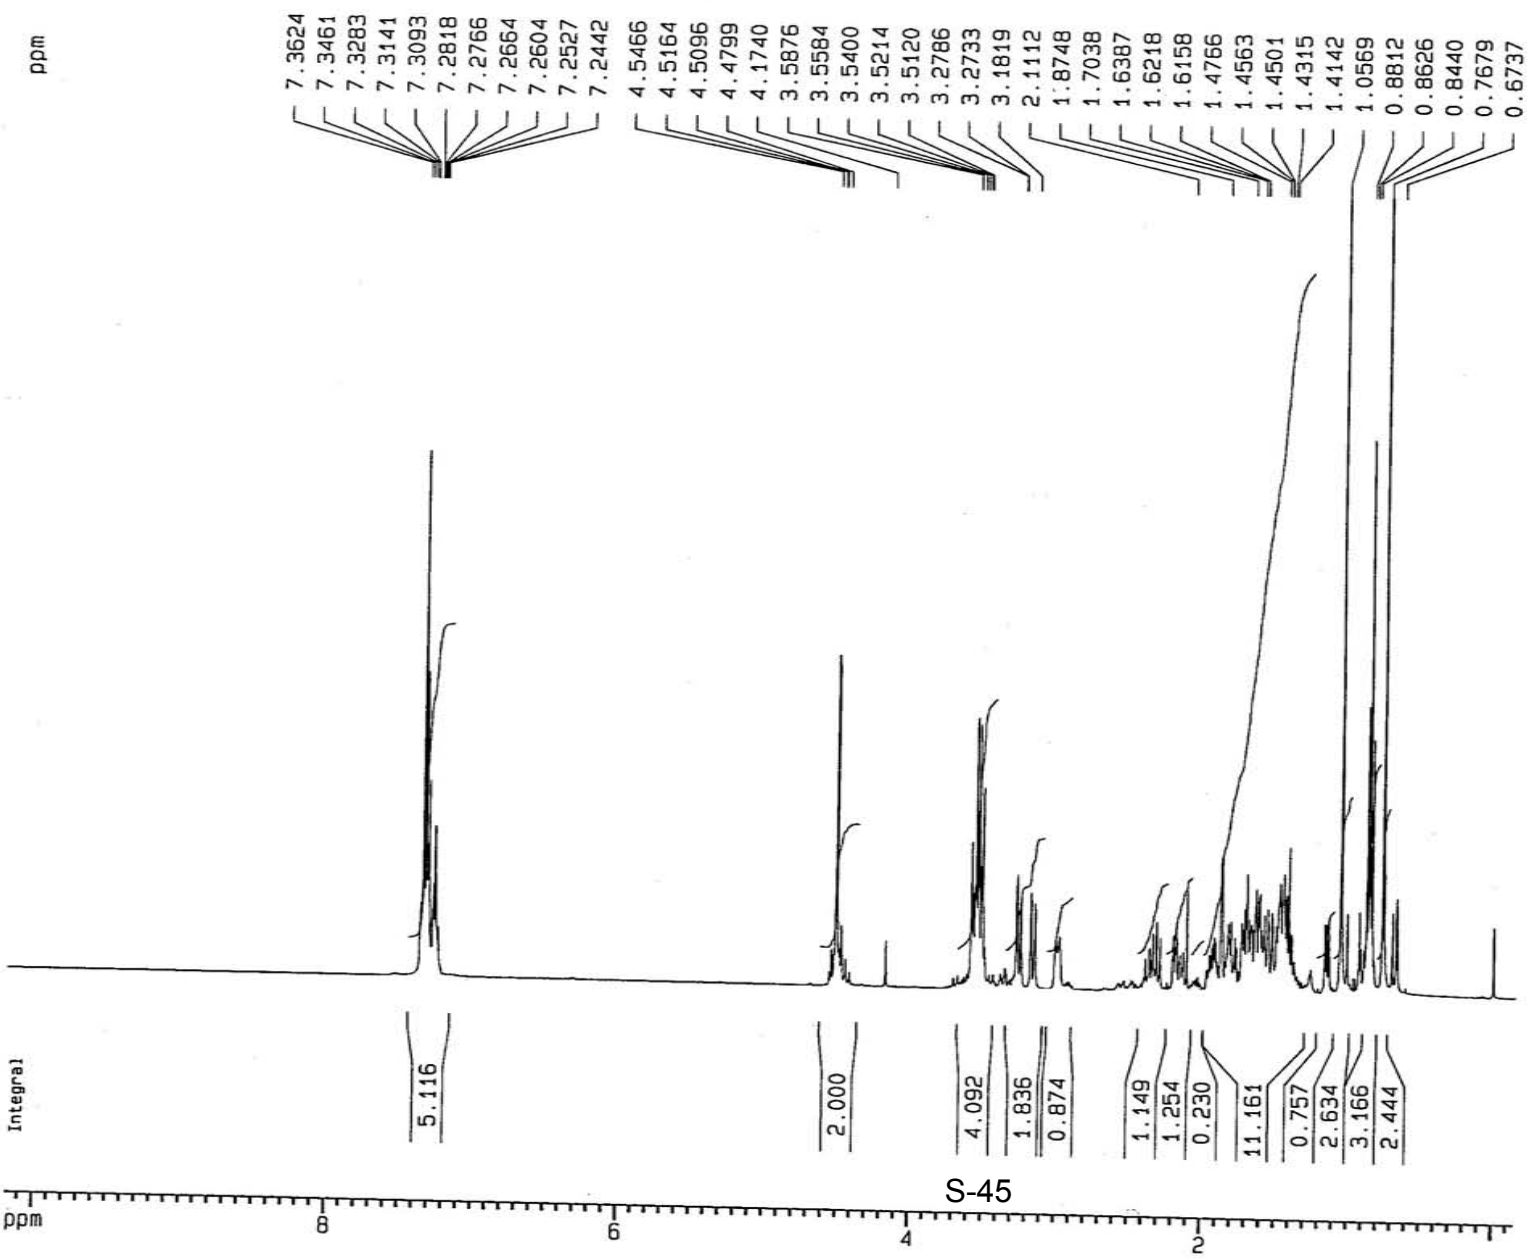

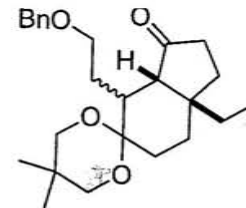

26

Current  
NAME raj-2-254-prdt  
EXPNO 2  
PROCNO 1

F2 - Acquisition Parameters  
Date\_ 990827  
Time 7.40  
INSTRUM drx400  
PROBHD 5 mm Multinu  
PULPROG zgpg30  
TD 65536  
SOLVENT COC13  
NS 1024  
DS 2  
SWH 23148.148 Hz  
FIDRES 0.353213 Hz  
AQ 1.4156276 sec  
RG 4096  
DW 21.600 usec  
DE 4.50 usec  
TE 300.0 K  
d11 0.0300000 sec  
d12 0.0000200 sec  
PL13 18.00 dB  
D1 0.05000000 sec  
CPDPRG2 waltz16  
PCPD2 100.00 usec  
SF02 400.1316005 MHz  
NUC2 1H  
PL2 -6.00 dB  
PL12 18.00 dB  
P1 6.90 usec  
DE 4.50 usec  
SF01 100.6232933 MHz  
NUC1 13C  
PL1 -6.00 dB

F2 - Processing parameters  
SI 32768  
SF 100.6127791 MHz  
WDW EM  
SSB 0  
LB 1.00 Hz  
GB 0  
PC 1.40

1D NMR plot parameters  
CX 20.00 cm  
F1P 230.000 ppm  
F1 23140.94 Hz  
F2P -10.534 ppm  
F2 -1059.82 Hz  
PPMCM 12.02668 ppm/cm  
HZCM 1210.03796 Hz/cm

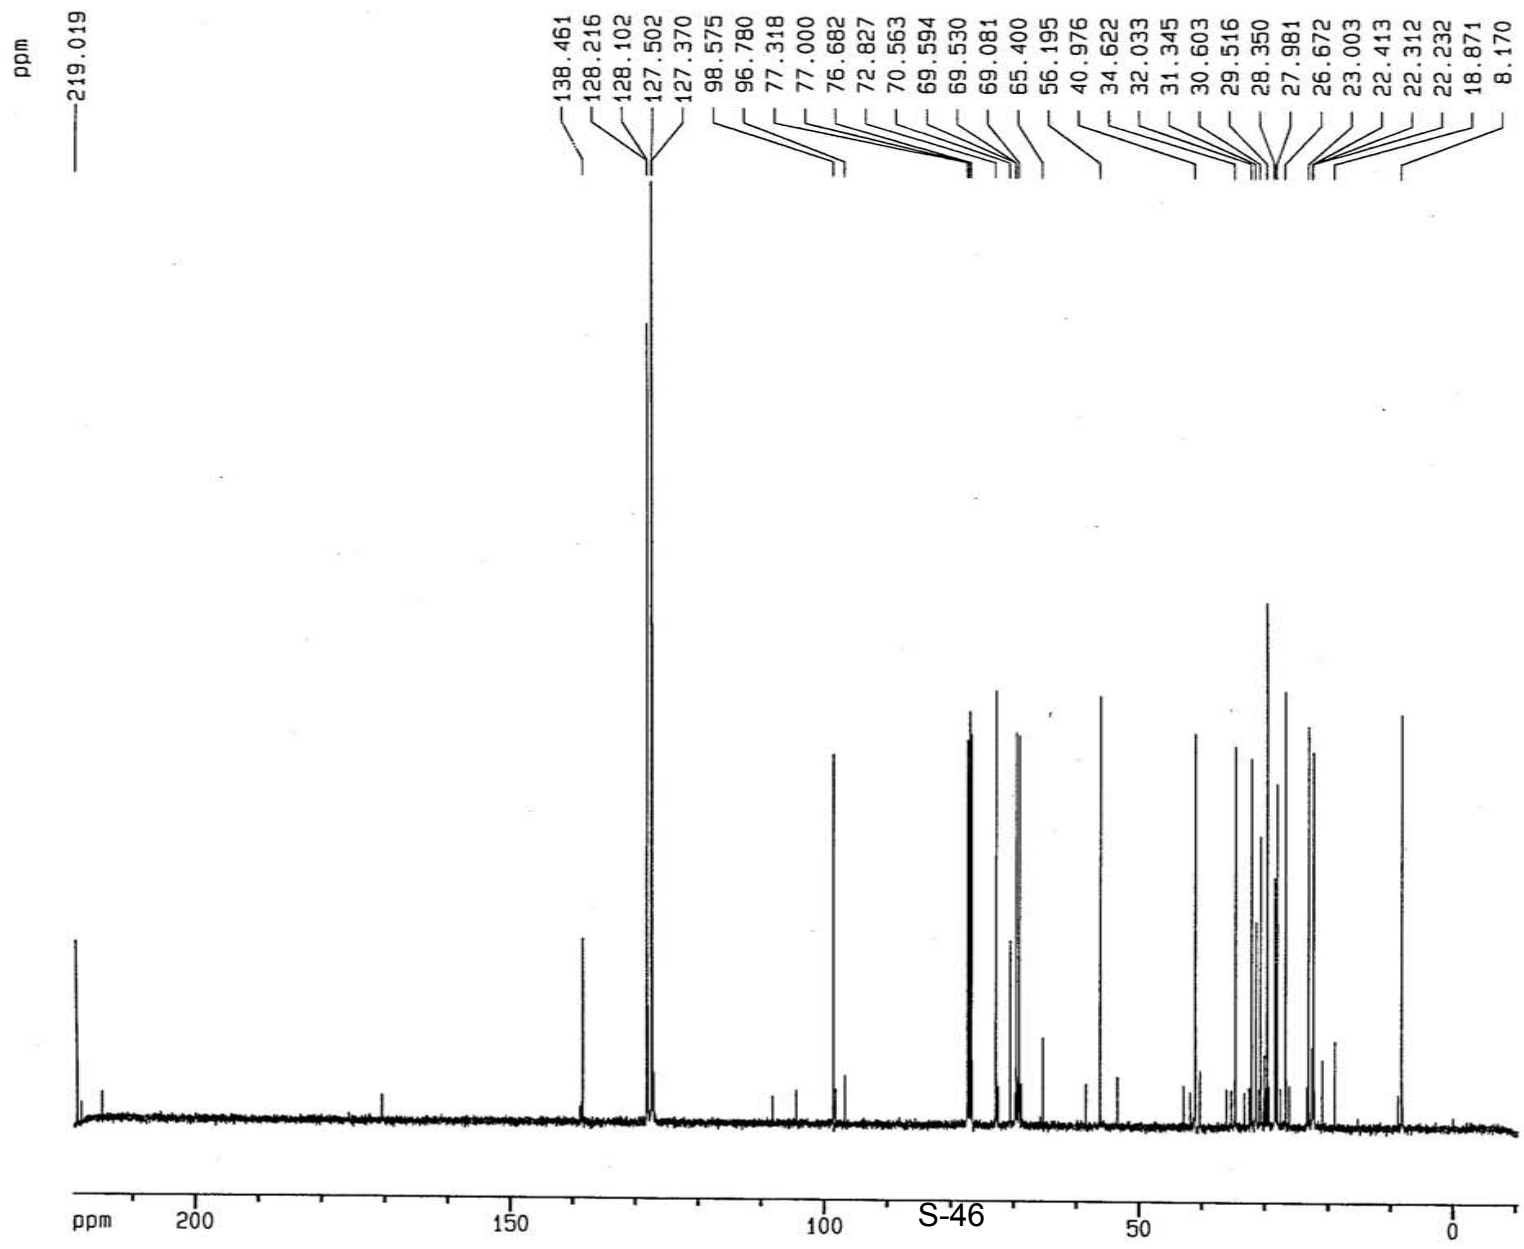

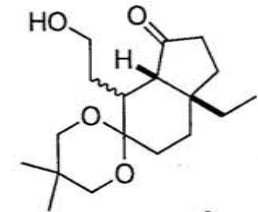

Current Date **27** 5  
 NAME sm-raj-2-2b1  
 EXPNO 1  
 PROCNO 1

**F2 - Acquisition Parameters**  
 Date\_ 991006  
 Time 15.49  
 INSTRUM drx400  
 PROBHD 5 mm Multinu  
 PULPROG zg30  
 TD 32768  
 SOLVENT CDCl3  
 NS 16  
 DS 2  
 SWH 4789.272 Hz  
 FIDRES 0.146157 Hz  
 AQ 3.4210291 sec  
 RG 32  
 DW 104.400 usec  
 DE 4.50 usec  
 TE 300.2 K  
 D1 1.0000000 sec  
 P1 7.70 usec  
 DE 4.50 usec  
 SF01 400.1320007 MHz  
 NUC1 1H  
 PL1 -6.00 dB

**F2 - Processing parameters**  
 SI 16384  
 SF 400.1299849 MHz  
 WDW EM  
 SSB 0  
 LB 0.30 Hz  
 GB 0  
 PC 1.00

**1D NMR plot parameters**  
 CX 20.00 cm  
 F1P 7.543 ppm  
 F1 3018.10 Hz  
 F2P -0.233 ppm  
 F2 -93.12 Hz  
 PPMCM 0.38878 ppm/cm  
 HZCM 155.56064 Hz/cm

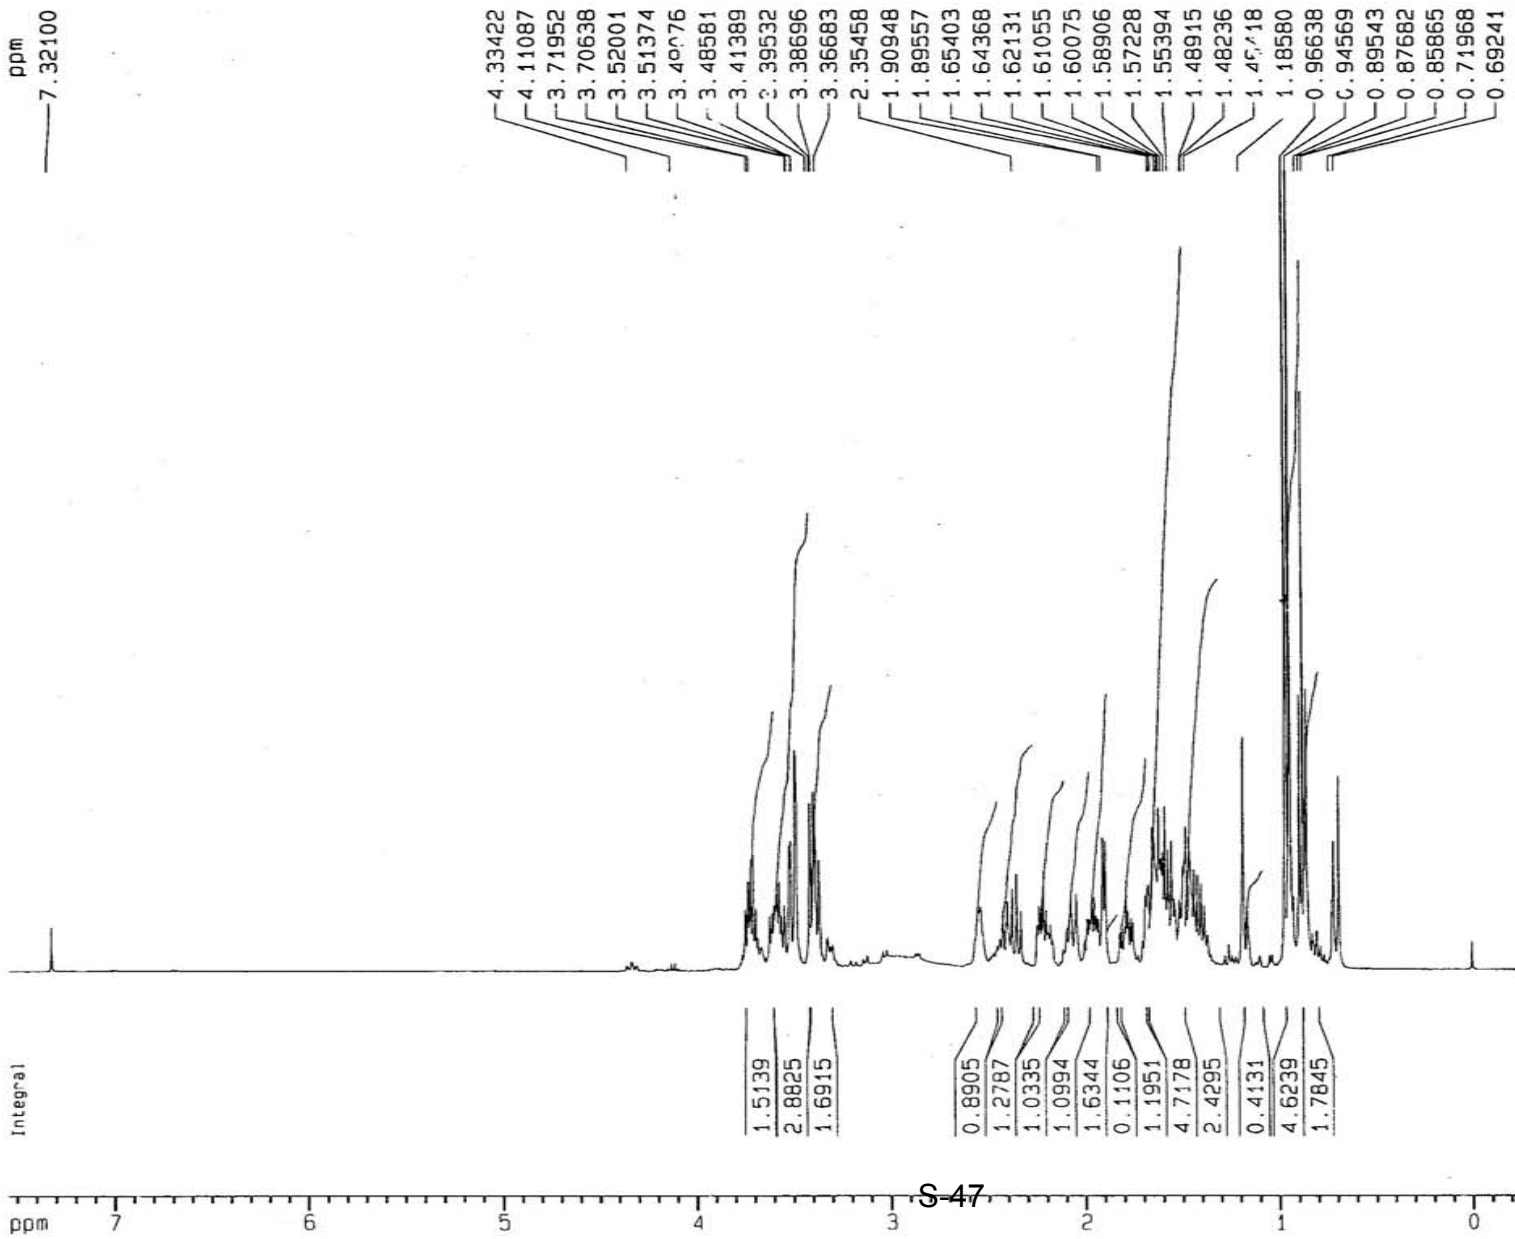

RAJ-2-255

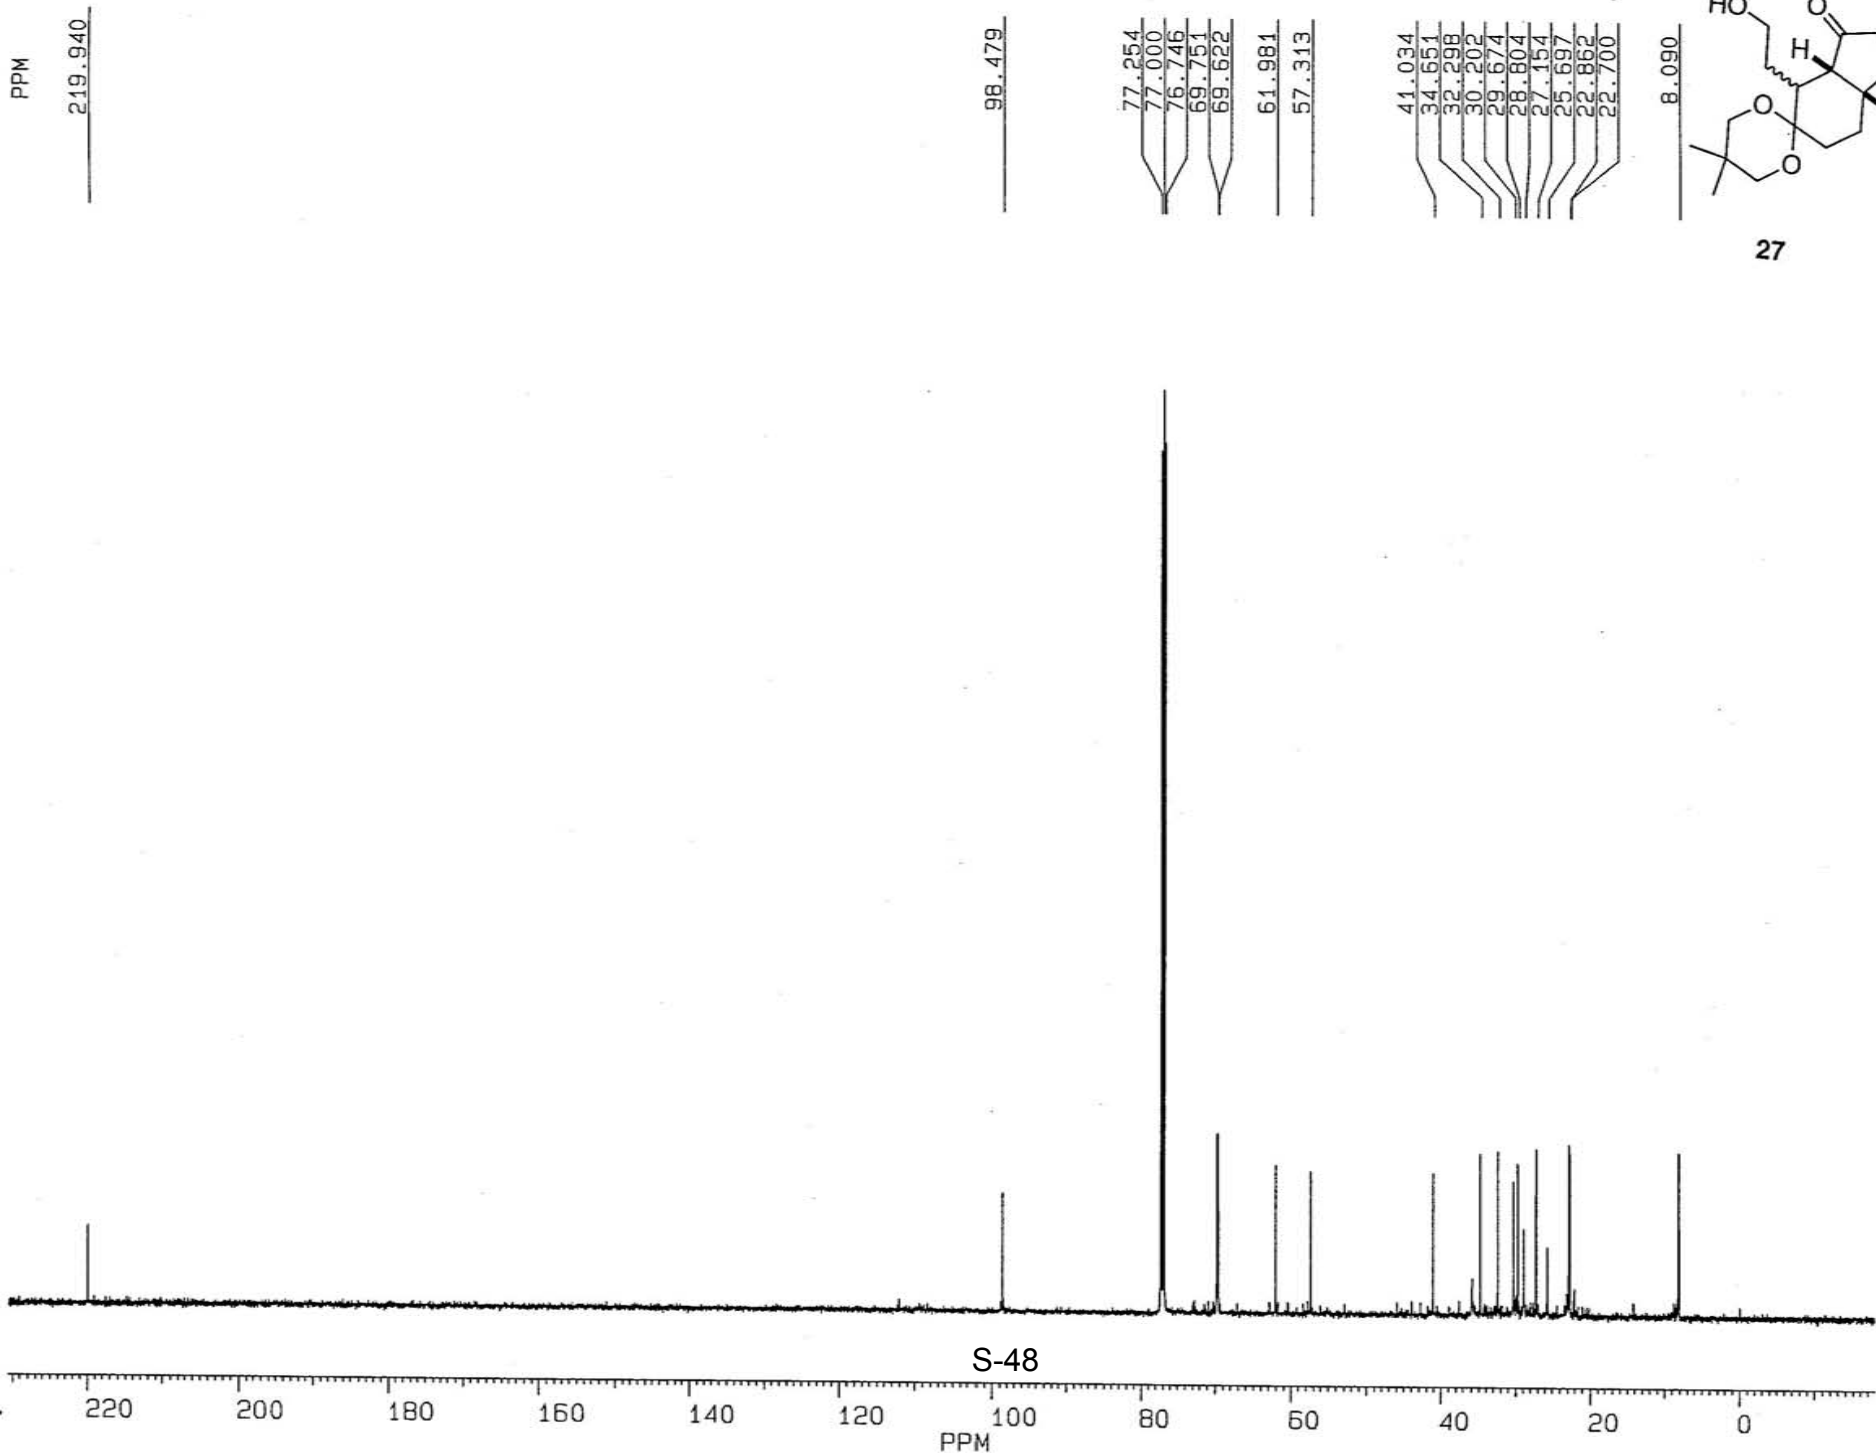

S-48



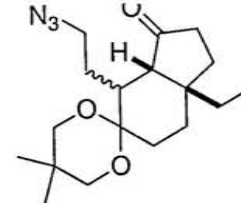

28

NAME raj-2-231-prdt  
 EXPNO 1  
 PROCNO 1

F2 - Acquisition Parameters

Date\_ 990729  
 Time 23.44  
 INSTRUM drx400  
 PROBHD 5 mm Multinu  
 PULPROG zg30  
 TD 32768  
 SOLVENT CDC13  
 NS 16  
 DS 2  
 SWH 4789.272 Hz  
 FIDRES 0.146157 Hz  
 AQ 3.4210291 sec  
 RG 64  
 DW 104.400 usec  
 DE 4.50 usec  
 TE 300.0 K  
 D1 1.00000000 sec  
 P1 7.70 usec  
 DE 4.50 usec  
 SFO1 400.1320007 MHz  
 NUC1 1H  
 PL1 -6.00 dB

F2 - Processing parameters

SI 16384  
 SF 400.1300024 MHz  
 WDW EM  
 SSB 0  
 LB 0.30 Hz  
 GB 0  
 PC 1.00

1D NMR plot parameters

CX 20.00 cm  
 F1P 10.145 ppm  
 F1 4059.29 Hz  
 F2P -0.225 ppm  
 F2 -90.19 Hz  
 PPMCM 0.51852 ppm/cm  
 HZCM 207.47418 Hz/cm

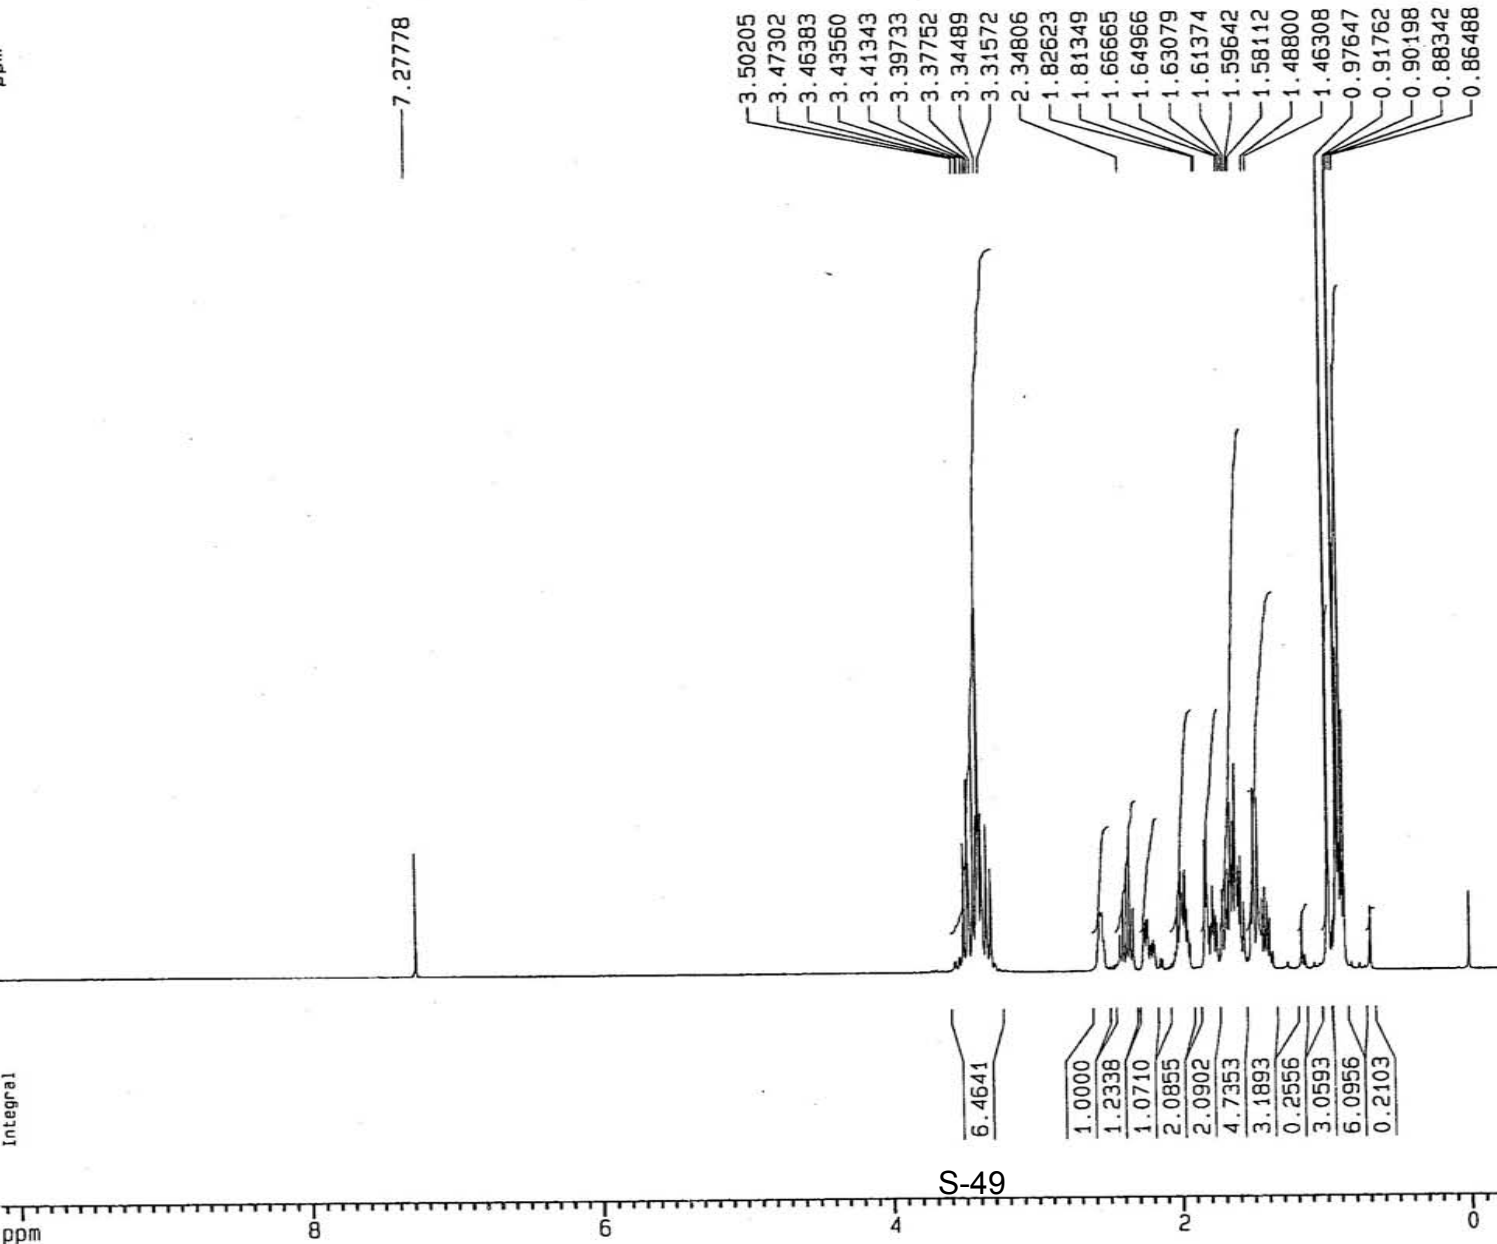

S-49

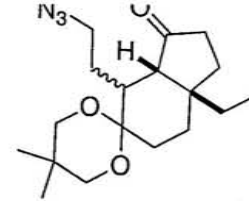

28

Current Data Parameters  
 NAME raj-2-231-prdt  
 EXPNO 2  
 PROCNO 1

F2 - Acquisition Parameters

Date\_ 990730  
 Time 0.14  
 INSTRUM drx400  
 PROBHD 5 mm Multinu  
 PULPROG zgpg30  
 TD 65536  
 SOLVENT CDC13  
 NS 1024  
 DS 2  
 SWH 23148.148 Hz  
 FIDRES 0.353213 Hz  
 AQ 1.4156276 sec  
 RG 1024  
 DW 21.600 usec  
 DE 4.50 usec  
 TE 300.0 K  
 d11 0.0300000 sec  
 d12 0.0000200 sec  
 PL13 18.00 dB  
 D1 0.05000000 sec  
 CPDPRG2 waltz16  
 PCPD2 100.00 usec  
 SF02 400.1316005 MHz  
 NUC2 1H  
 PL2 -6.00 dB  
 PL12 18.00 dB  
 P1 6.90 usec  
 DE 4.50 usec  
 SF01 100.6232933 MHz  
 NUC1 13C  
 PL1 -6.00 dB

F2 - Processing parameters

SI 32768  
 SF 100.6127734 MHz  
 WDW EM  
 SSB 0  
 LB 1.00 Hz  
 GB 0  
 PC 1.40

1D NMR plot parameters

CX 20.00 cm  
 F1P 225.000 ppm  
 F1 22637.87 Hz  
 F2P -5.000 ppm  
 F2 -503.06 Hz  
 PPMCM 11.50000 ppm/cm  
 HZCM 1157.04688 Hz/cm

218.945

98.519

77.321  
 77.003  
 76.685  
 69.685  
 69.645  
 56.692  
 50.773  
 41.025  
 34.571  
 34.183  
 32.255  
 29.636  
 29.453  
 27.027  
 26.850  
 26.508  
 22.754  
 22.641  
 8.157

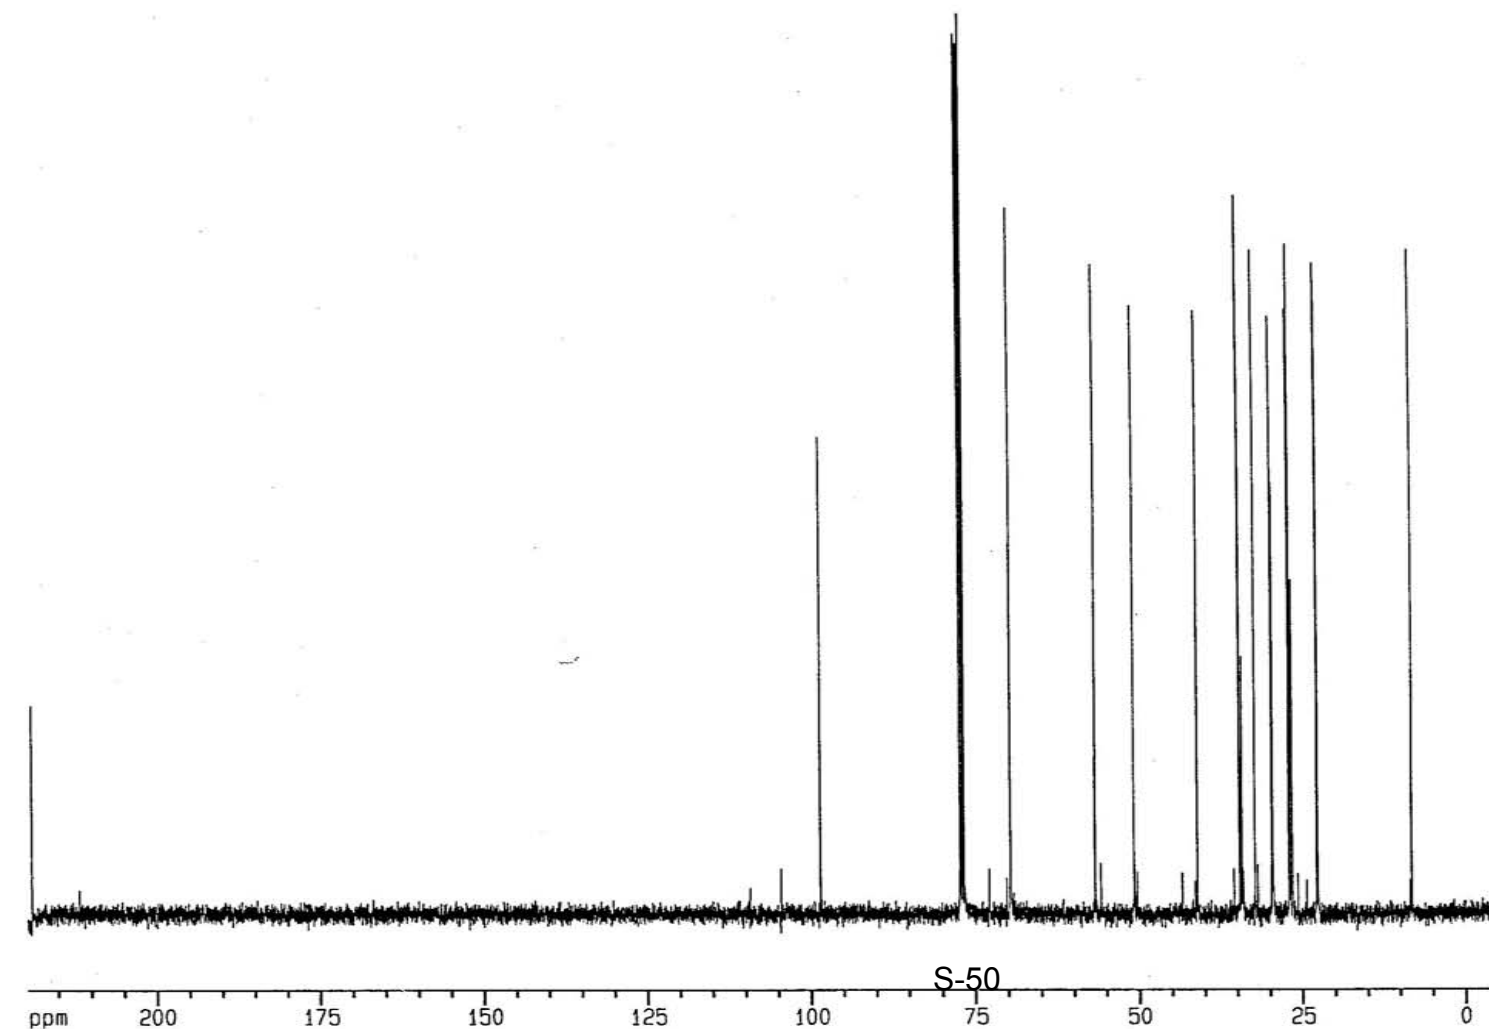

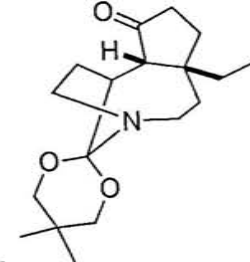

29

Current NAME  
EXPNO 1  
PROCNO 1

F2 - Acquisition Parameters  
Date\_ 991021  
Time 12.10  
INSTRUM drx400  
PROBHD 5 mm Multinu  
PULPROG zg30  
TD 32768  
SOLVENT CDC13  
NS 16  
DS 2  
SWH 4789.272 Hz  
FIDRES 0.146157 Hz  
AQ 3.4210291 sec  
RG 64  
DW 104.400 usec  
DE 4.50 usec  
TE 300.0 K  
D1 1.000000 sec  
P1 7.70 usec  
DE 4.50 usec  
SF01 400.1320007 MHz  
NUC1 1H  
PL1 -6.00 dB

F2 - Processing parameters  
SI 16384  
SF 400.1300003 MHz  
WDW EM  
SSB 0  
LB 0.30 Hz  
GB 0  
PC 1.00

1D NMR plot parameters  
CX 20.00 cm  
F1P 10.063 ppm  
F1 4026.53 Hz  
F2P -0.168 ppm  
F2 -67.37 Hz  
PPMCM 0.51157 ppm/cm  
HZCM 204.69534 Hz/cm

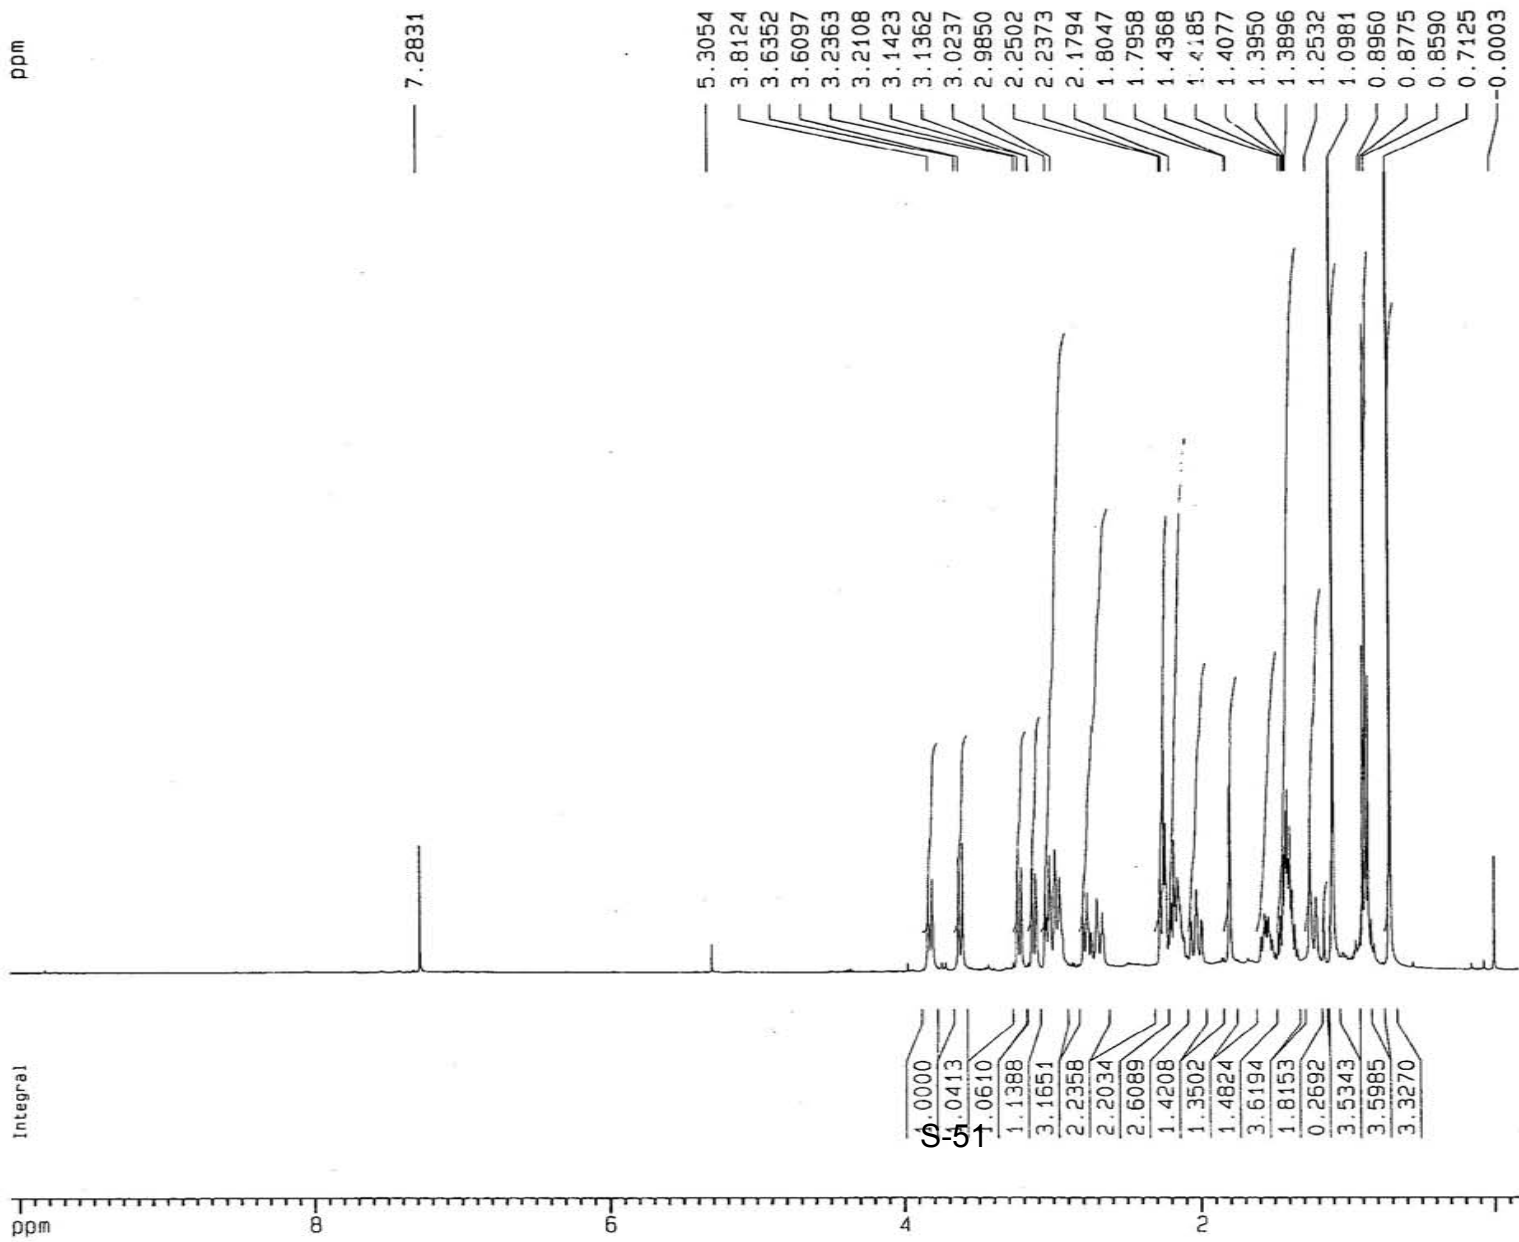

Integral

ppm

RAJ-2-285

PPM  
221.234

112.331

77.254  
77.000  
76.746  
72.139  
68.977  
55.835  
49.054  
47.153  
44.858  
44.392  
38.810  
36.605  
33.016  
29.352  
29.289  
28.807  
22.785  
21.711  
8.613

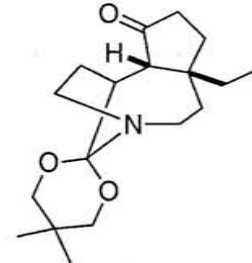

29

SF 125.759  
SY 93.0  
O1 2500.000  
SI 65536  
TD 65536  
SW 31250.000  
HZ/PT .954

PW 2.0  
RD 1.000  
AQ 1.049  
RG 200  
NS 806  
TE 297

FW 39100  
O2 7500.000  
DP 15H D0

LB 1.000  
GB 0.0  
CX 22.00  
CY 0.0  
F1 230.115  
F2 -18.125  
HZ/CM 1.419E3  
PPM/CM 11.284  
SR -10844.61

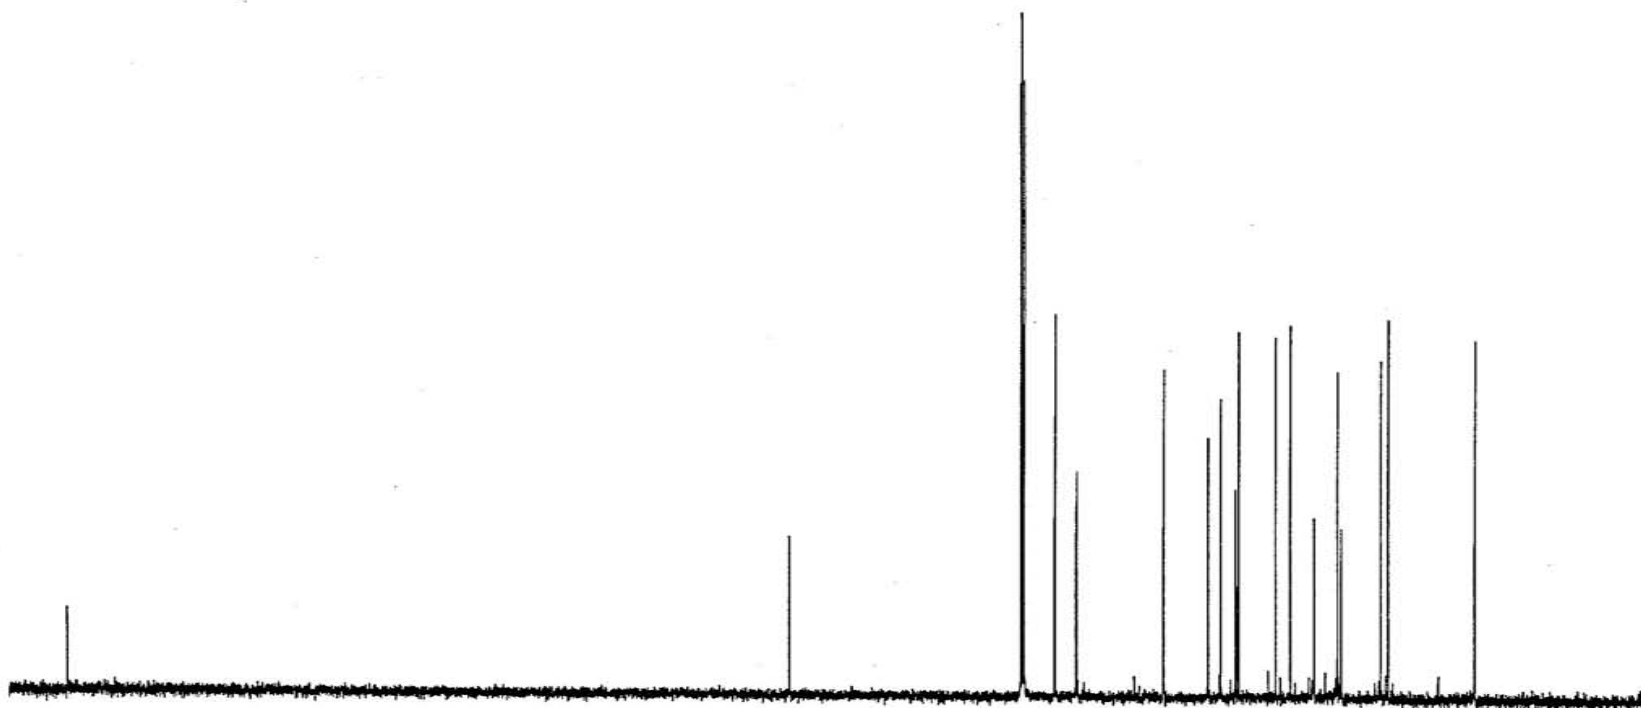

S-52

220 200 180 160 140 120 100 80 60 40 20 0  
PPM

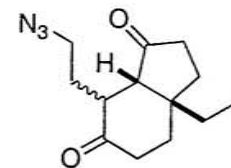

7

Current Data Parameters  
 NAME raj-2-261-prdt  
 EXPNO 1  
 PROCNO 1

F2 - Acquisition Parameters

Date\_ 990913  
 Time 14.29  
 INSTRUM drx400  
 PROBHD 5 mm Multinu  
 PULPROG zg30  
 TD 32768  
 SOLVENT CDC13  
 NS 16  
 DS 2  
 SWH 4789.272 Hz  
 FIDRES 0.146157 Hz  
 AQ 3.4210291 sec  
 RG 812.7  
 DW 104.400 usec  
 DE 4.50 usec  
 TE 300.0 K  
 D1 1.00000000 sec  
 P1 7.70 usec  
 DE 4.50 usec  
 SFO1 400.1320007 MHz  
 NUC1 1H  
 PL1 -6.00 dB

F2 - Processing parameters

SI 16384  
 SF 400.1300077 MHz  
 WDW EM  
 SSB 0  
 LB 0.30 Hz  
 GB 0  
 PC 1.00

1D NMR plot parameters

CX 20.00 cm  
 F1P 10.217 ppm  
 F1 4088.30 Hz  
 F2P -0.325 ppm  
 F2 -129.94 Hz  
 PPMCM 0.52711 ppm/cm  
 HZCM 210.91219 Hz/cm

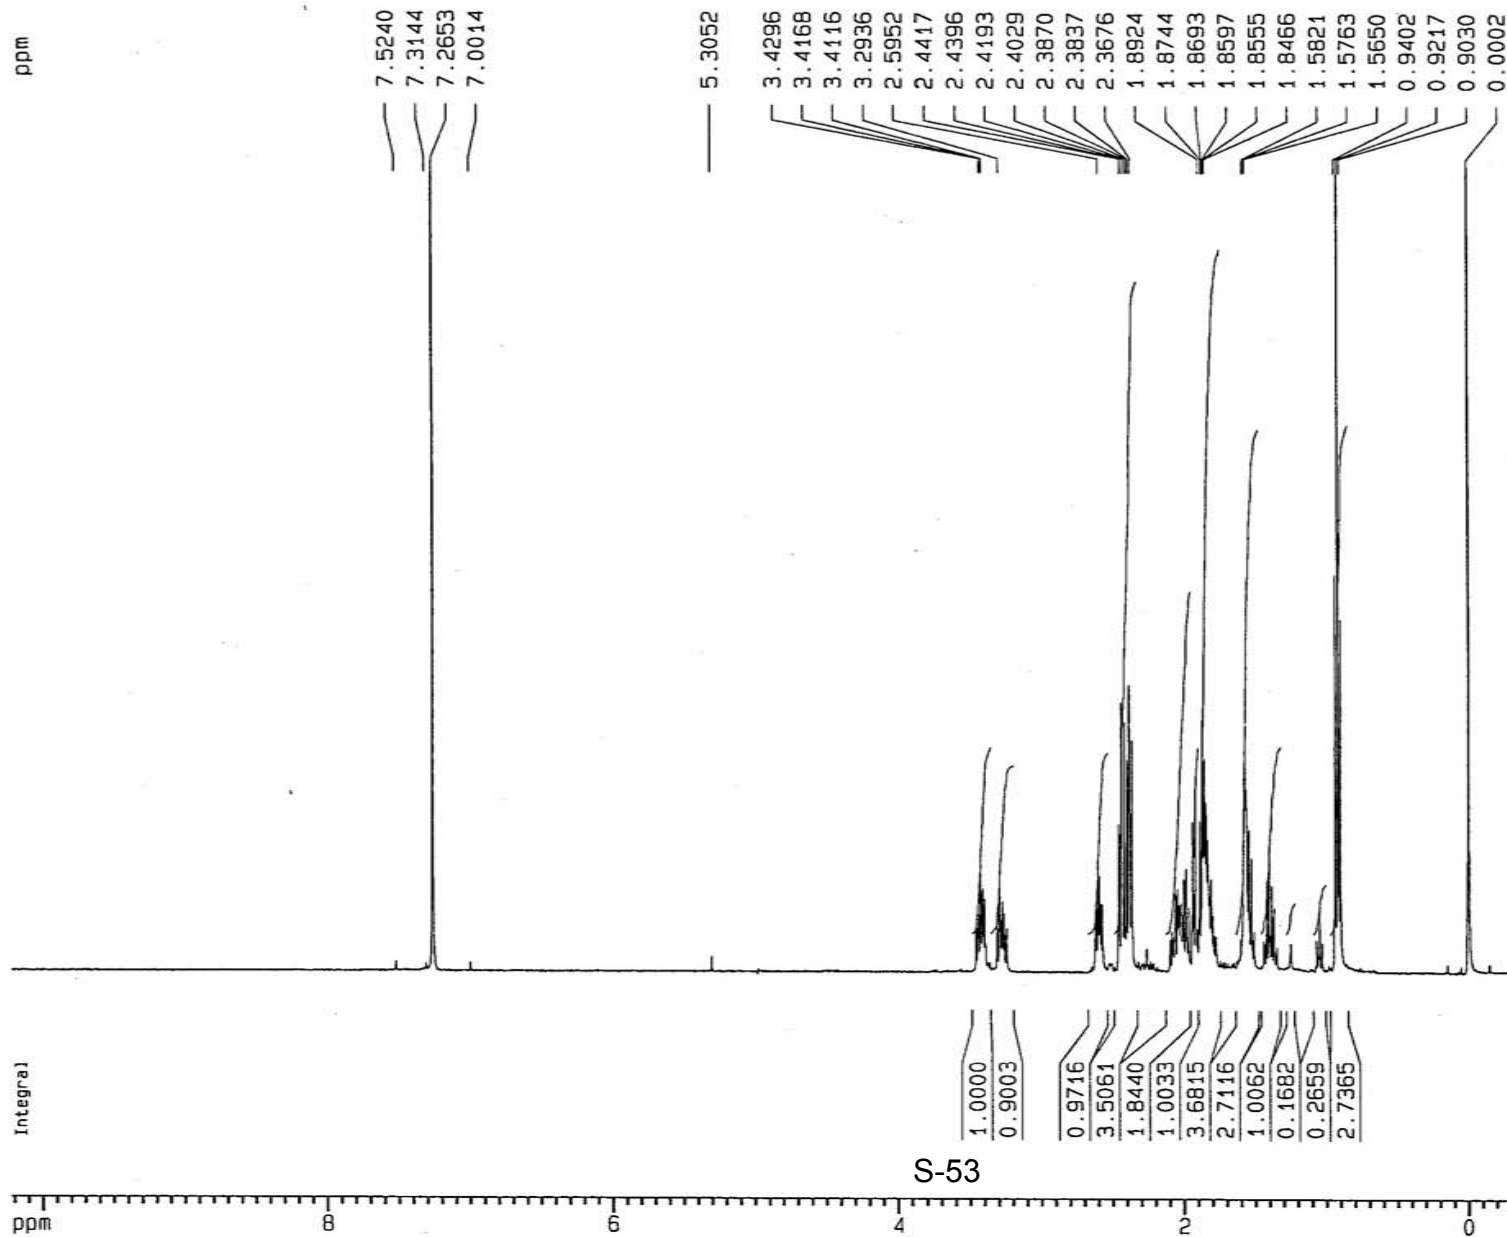

S-53

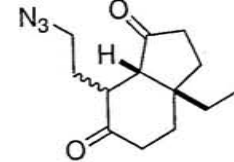

7

Current Data Parameters  
 NAME raj-2-233-prdt  
 EXPNO 2  
 PROCNO 1

F2 - Acquisition Parameters

Date\_ 990801  
 Time 19.08  
 INSTRUM drx400  
 PROBHD 5 mm Multinu  
 PULPROG zgpg30  
 TD 65536  
 SOLVENT CDCl3  
 NS 1024  
 DS 2  
 SWH 23148.148 Hz  
 FIDRES 0.353213 Hz  
 AQ 1.4156276 sec  
 RG 1024  
 DW 21.600 usec  
 DE 4.50 usec  
 TE 300.0 K  
 d11 0.0300000 sec  
 d12 0.0000200 sec  
 PL13 18.00 dB  
 D1 0.05000000 sec  
 CPDPRG2 waltz16  
 PCPD2 100.00 usec  
 SF02 400.1316005 MHz  
 NUC2 1H  
 PL2 -6.00 dB  
 PL12 18.00 dB  
 P1 6.90 usec  
 DE 4.50 usec  
 SF01 100.6232933 MHz  
 NUC1 13C  
 PL1 -6.00 dB

F2 - Processing parameters

SI 32768  
 SF 100.6127720 MHz  
 WDW EM  
 SSB 0  
 LB 1.00 Hz  
 GB 0  
 PC 1.40

1D NMR plot parameters

CX 20.00 cm  
 F1P 225.000 ppm  
 F1 22637.87 Hz  
 F2P -5.000 ppm  
 F2 -503.06 Hz  
 PPMCM 11.50000 ppm/cm  
 HZCM 1157.04688 Hz/cm

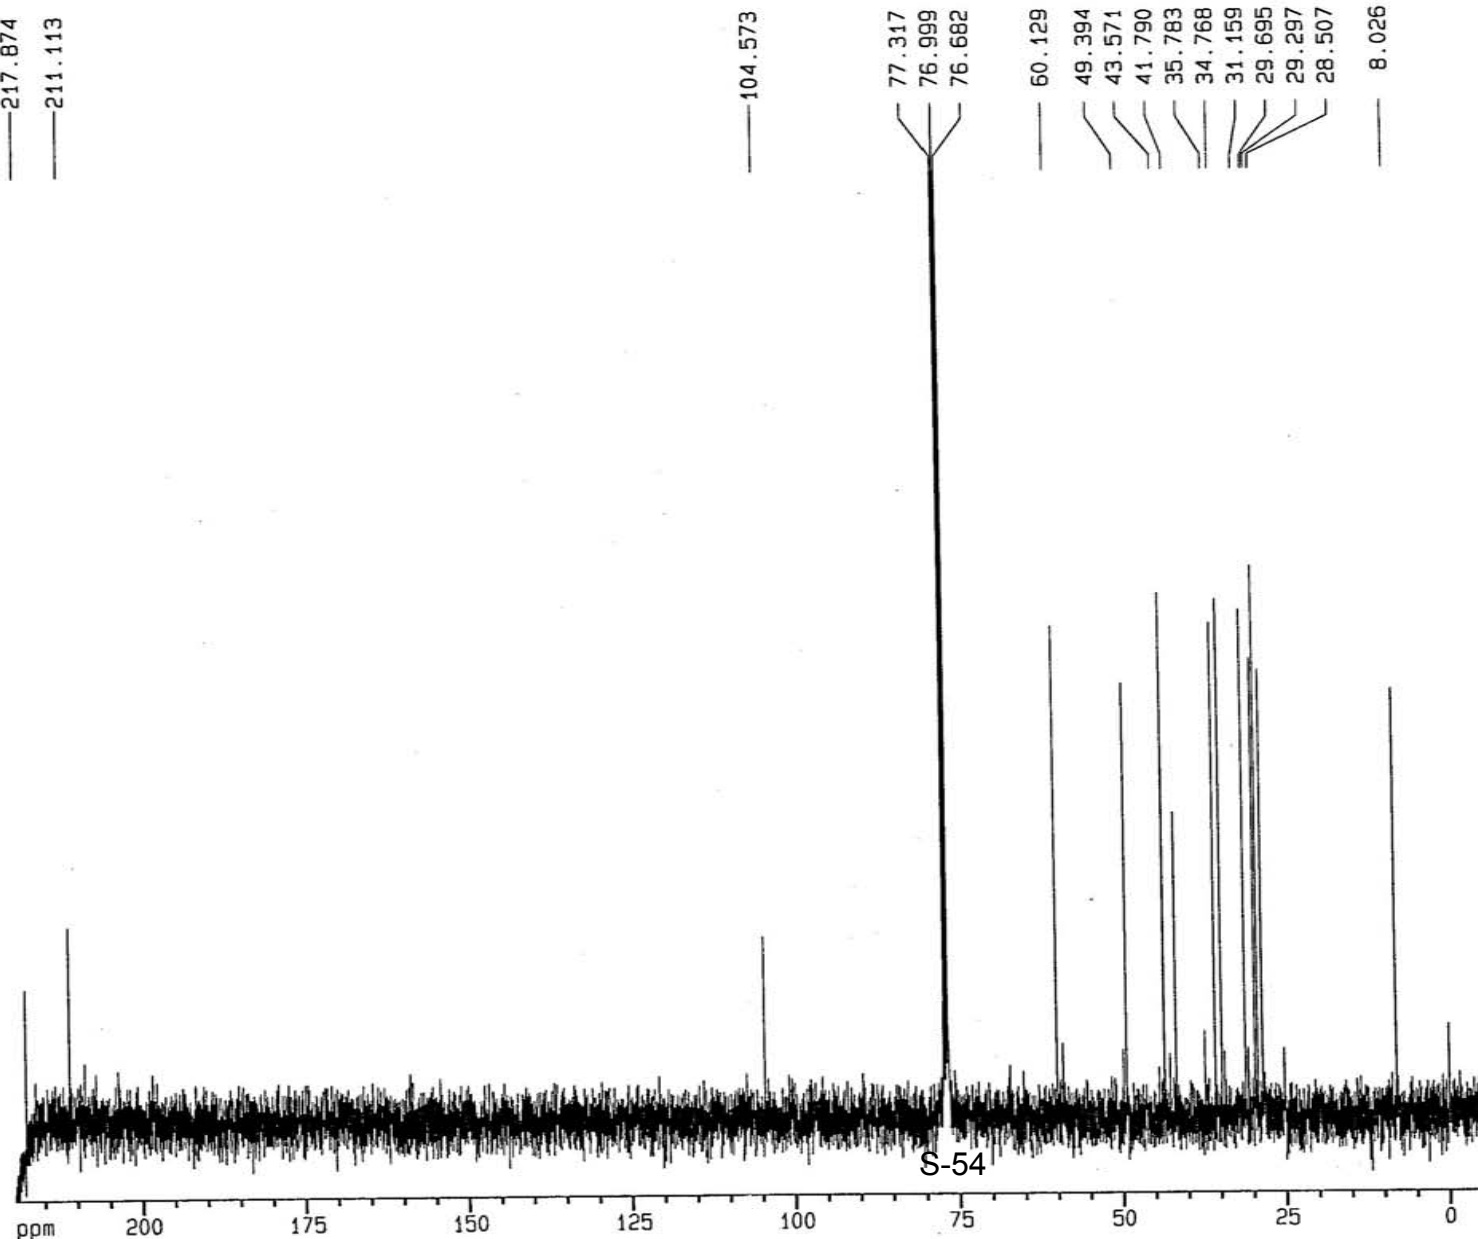

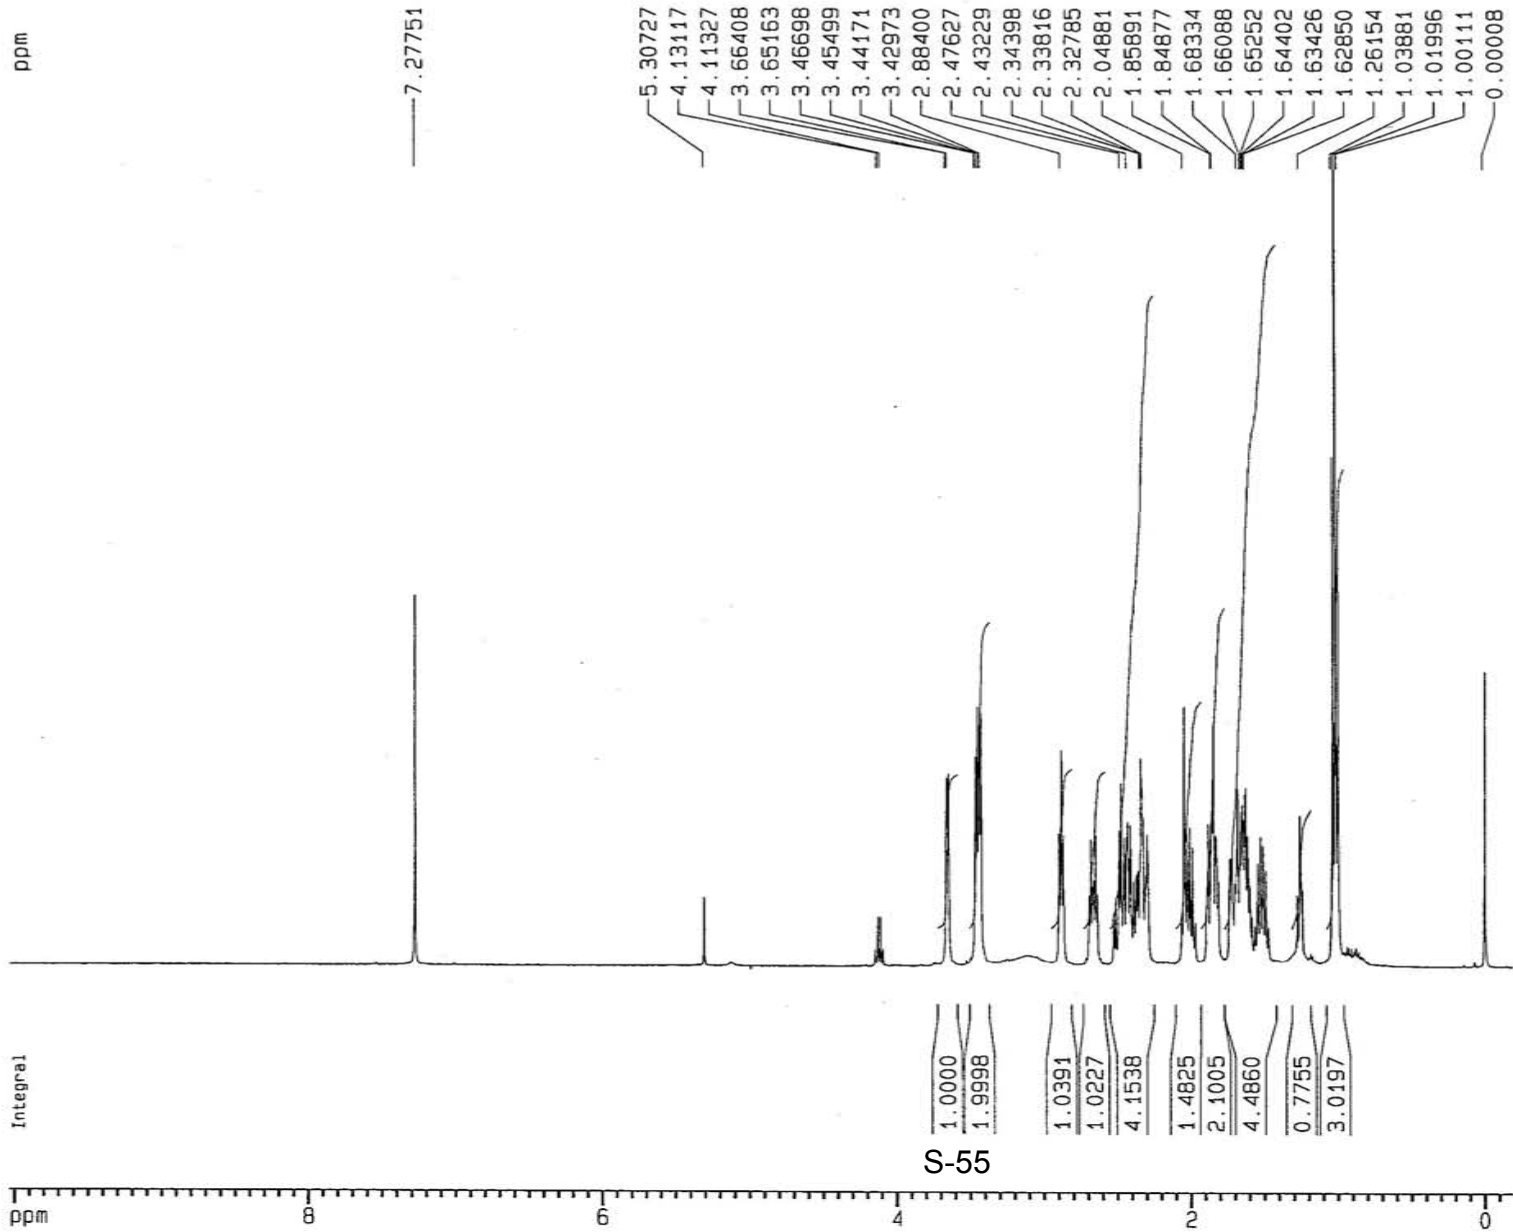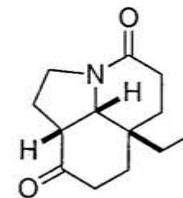

6

Current Data Parameters

NAME raj-2-192-prdt  
EXPNO 1  
PROCNO 1

F2 - Acquisition Parameters

Date\_ 990615  
Time 16.46  
INSTRUM drx400  
PROBHD 5 mm Multinu  
PULPROG zg30  
TD 32768  
SOLVENT CDC13  
NS 16  
DS 2  
SWH 4789.272 Hz  
FIDRES 0.146157 Hz  
AQ 3.4210291 sec  
RG 181  
DW 104.400 usec  
DE 4.50 usec  
TE 300.0 K  
D1 1.00000000 sec  
P1 7.70 usec  
DE 4.50 usec  
SF01 400.1320007 MHz  
NUC1 1H  
PL1 -6.00 dB

F2 - Processing parameters

SI 16384  
SF 400.1300024 MHz  
WDW EM  
SSB 0  
LB 0.30 Hz  
GB 0  
PC 1.00

1D NMR plot parameters

CX 20.00 cm  
F1P 10.033 ppm  
F1 4014.54 Hz  
F2P -0.189 ppm  
F2 -75.50 Hz  
PPMCM 0.51109 ppm/cm  
HZCM 204.50191 Hz/cm

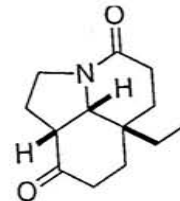

6

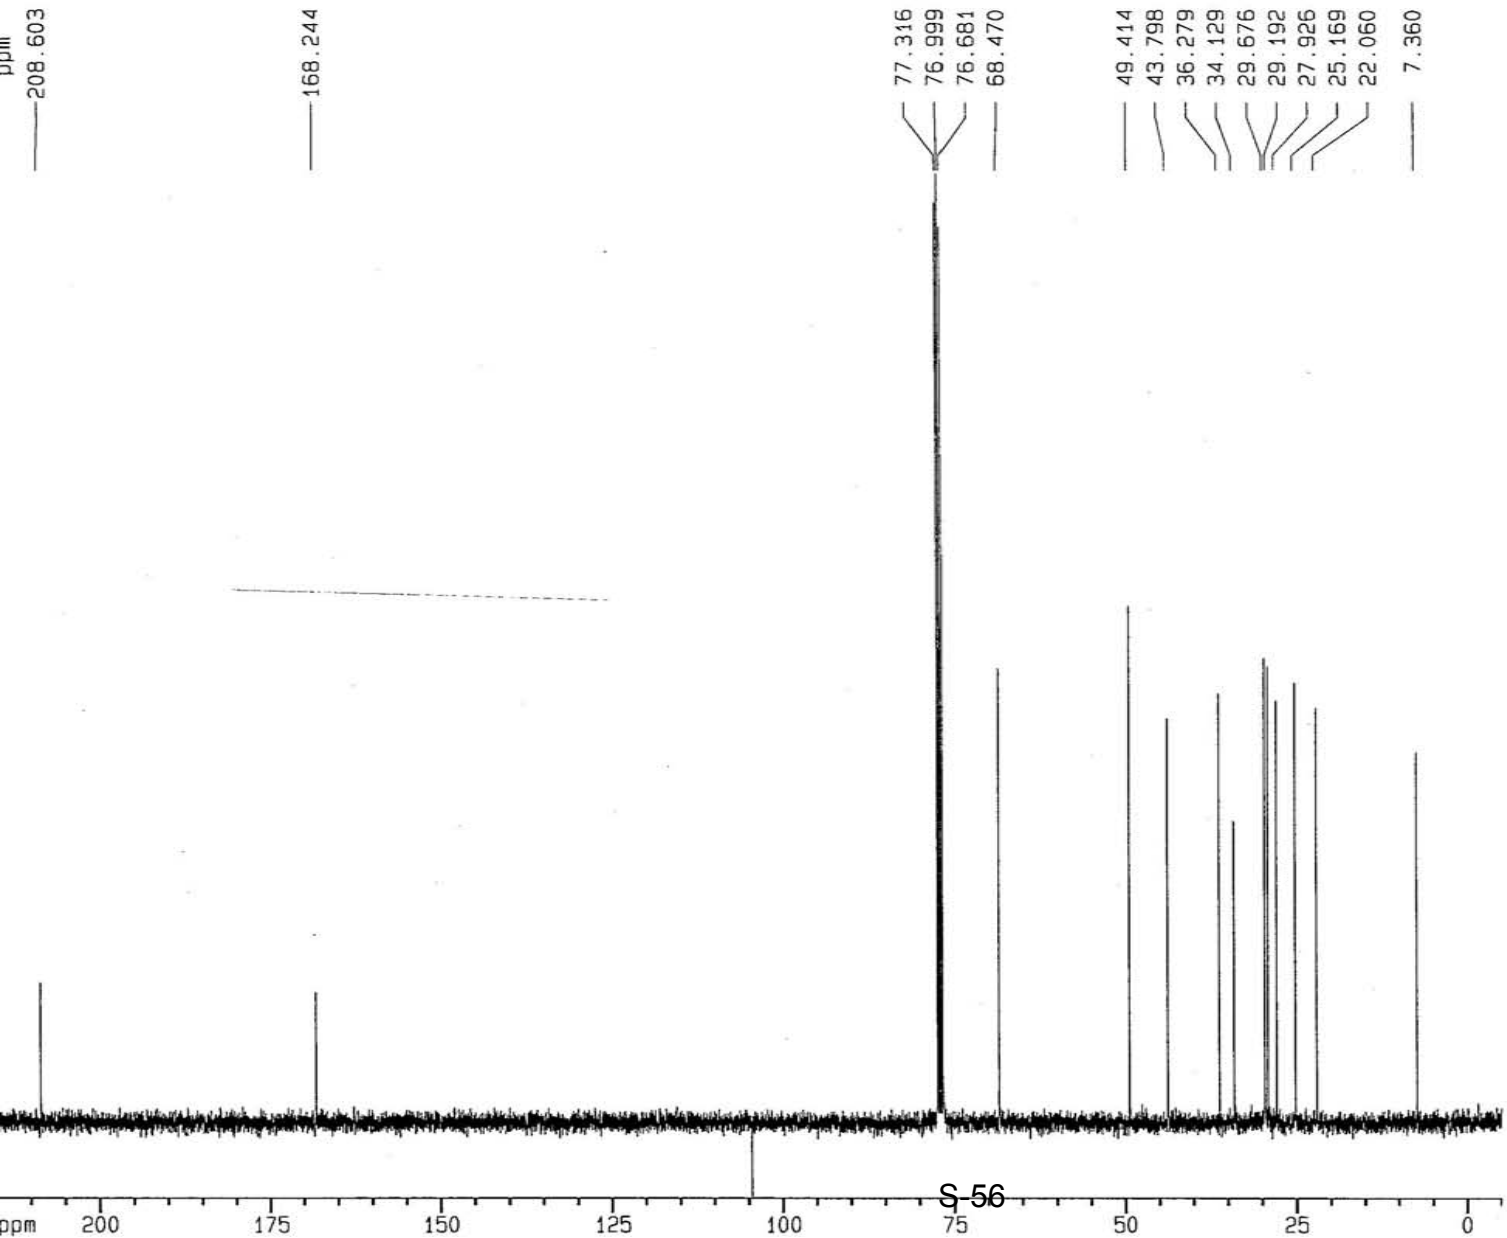

Current Data Parameters  
 NAME ks2.240  
 EXPNO 1  
 PROCNO 1

F2 - Acquisition Parameters  
 Date\_ 961018  
 Time 13.34  
 INSTRUM drx400  
 PROBHD 5 mm Multinu  
 PULPROG zgpg30  
 TD 65536  
 SOLVENT CDCl3  
 NS 1024  
 DS 2  
 SMH 23148.148 Hz  
 FIDRES 0.353213 Hz  
 AQ 1.4156276 sec  
 RG 1024  
 DW 21.600 usec  
 DE 4.50 usec  
 TE 300.0 K  
 d11 0.0300000 sec  
 d12 0.0000200 sec  
 PL13 18.00 dB  
 D1 0.05000000 sec  
 CPDPRG2 waltz16  
 PCPD2 100.00 usec  
 SF02 400.1316005 MHz  
 NUC2 1H  
 PL2 -6.00 dB  
 PL12 18.00 dB  
 P1 6.90 usec  
 DE 4.50 usec  
 SF01 100.6232933 MHz  
 NUC1 13C  
 PL1 -6.00 dB

F2 - Processing parameters  
 SI 32768  
 SF 100.6127741 MHz  
 WDW EM  
 SSB 0  
 LB 1.00 Hz  
 GB 0  
 PC 1.40

1D NMR plot parameters  
 CX 20.00 cm  
 F1P 215.000 ppm  
 F1 21631.75 Hz  
 F2P -5.000 ppm  
 F2 -503.07 Hz  
 PPMCM 11.00000 ppm/cm  
 HZCM 1106.74060 Hz/cm



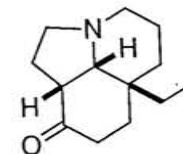

3

Current Data Parameters  
 NAME ks3.287  
 EXPNO 1  
 PROCNO 1

F2 - Acquisition Parameters

Date\_ 970501  
 Time 15.05  
 INSTRUM drx400  
 PROBHD 5 mm Multinu  
 PULPROG zg30  
 TD 32768  
 SOLVENT CDC13  
 NS 16  
 DS 2  
 SWH 4789.272 Hz  
 FIDRES 0.146157 Hz  
 AQ 3.4210291 sec  
 RG 90.5  
 DW 104.400 usec  
 DE 4.50 usec  
 TE 300.0 K  
 D1 1.00000000 sec  
 P1 7.70 usec  
 DE 4.50 usec  
 SFO1 400.1320007 MHz  
 NUC1 1H  
 PL1 -6.00 dB

F2 - Processing parameters

SI 16384  
 SF 400.1300000 MHz  
 WDW EM  
 SSB 0  
 LB 0.30 Hz  
 GB 0  
 PC 1.00

1D NMR plot parameters

CX 20.00 cm  
 F1P 9.500 ppm  
 F1 3801.24 Hz  
 F2P -0.500 ppm  
 F2 -200.07 Hz  
 PPMCM 0.50000 ppm/cm  
 HZCM 200.06500 Hz/cm

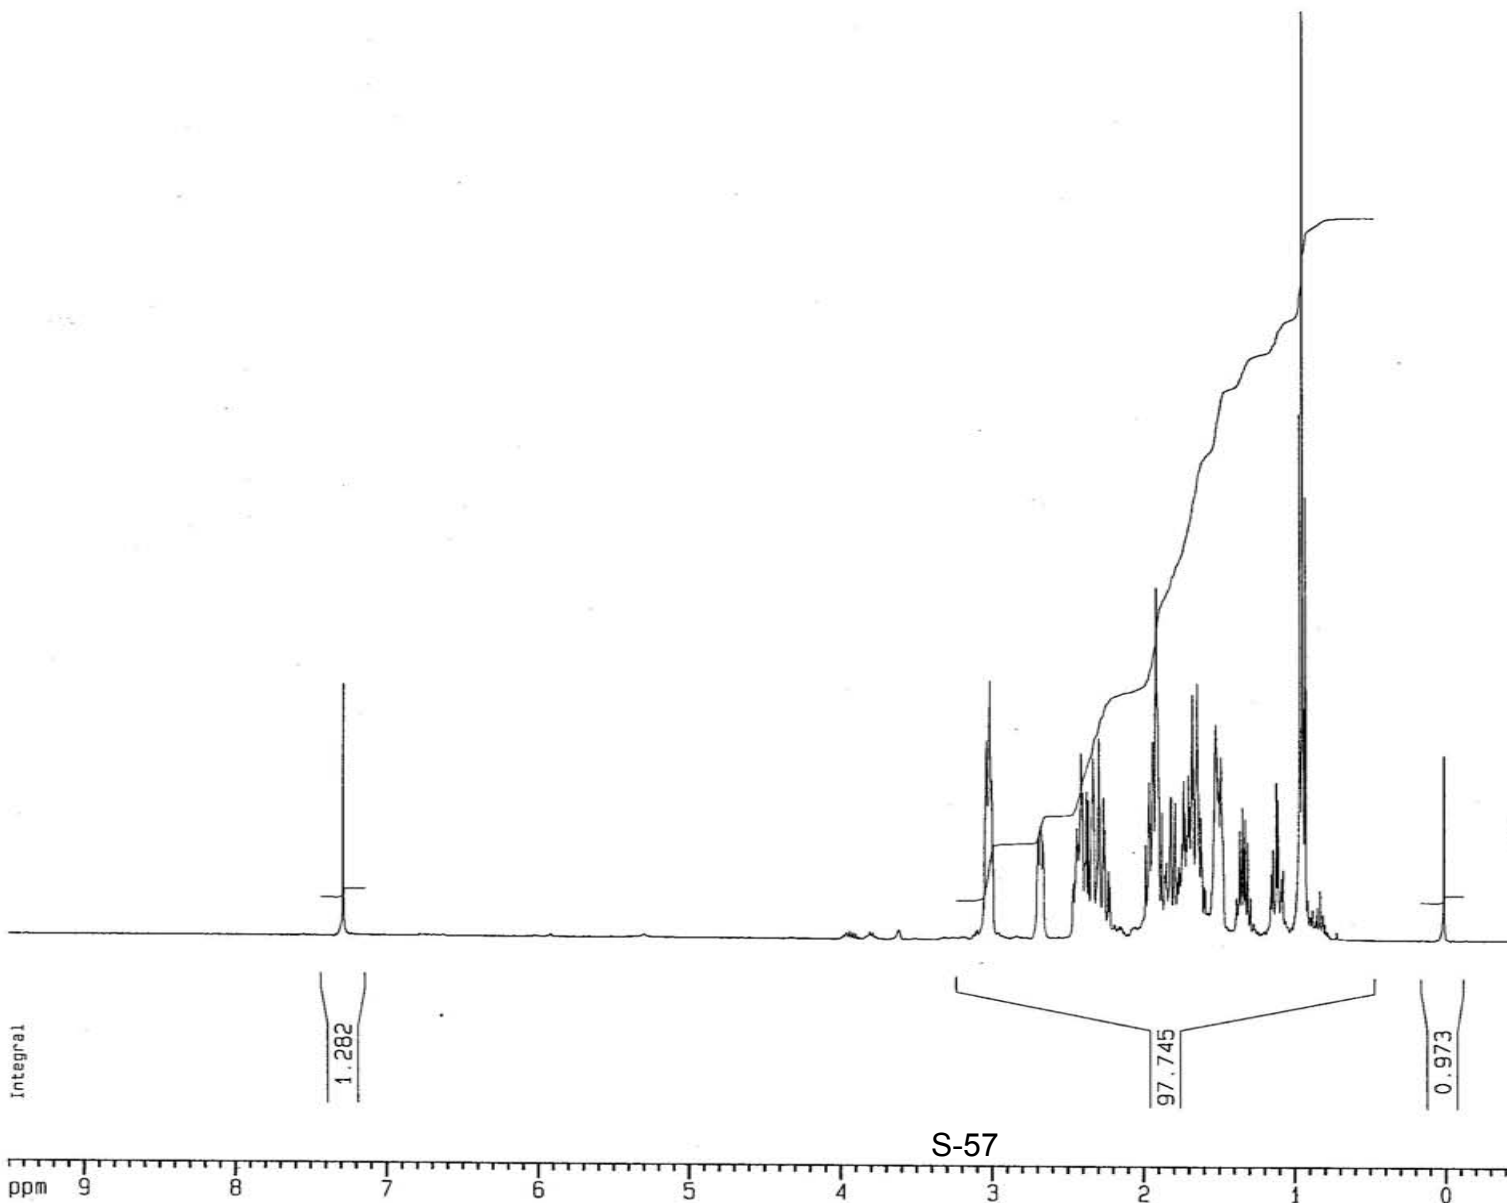

S-57

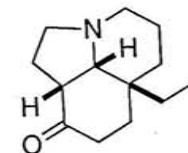

3

Current Data Parameters  
 NAME ks3.287  
 EXPNO 2  
 PROCNO 1

F2 - Acquisition Parameters  
 Date\_ 970501  
 Time 15.25  
 INSTRUM drx400  
 PROBHD 5 mm Multinu  
 PULPROG zgpg30  
 TD 65536  
 SOLVENT CDCl3  
 NS 512  
 DS 2  
 SWH 23148.148 Hz  
 FIDRES 0.353213 Hz  
 AQ 1.4156276 sec  
 RG 32768  
 DW 21.600 usec  
 DE 4.50 usec  
 TE 300.0 K  
 d11 0.0300000 sec  
 d12 0.0000200 sec  
 PL13 18.00 dB  
 D1 0.05000000 sec  
 CPDPRG2 waltz16  
 PCPD2 100.00 usec  
 SF02 400.1316005 MHz  
 NUC2 1H  
 PL2 -6.00 dB  
 PL12 18.00 dB  
 P1 6.90 usec  
 DE 4.50 usec  
 SF01 100.6232933 MHz  
 NUC1 13C  
 PL1 -6.00 dB

F2 - Processing parameters  
 SI 32768  
 SF 100.6127290 MHz  
 WDH EM  
 SSB 0  
 LB 1.00 Hz  
 GB 0  
 PC 1.40

1D NMR plot parameters  
 CX 20.00 cm  
 F1P 220.000 ppm  
 F1 22134.80 Hz  
 F2P -5.000 ppm  
 F2 -503.07 Hz  
 PPMCM 11.25000 ppm/cm  
 HZCM 1131.89319 Hz/cm

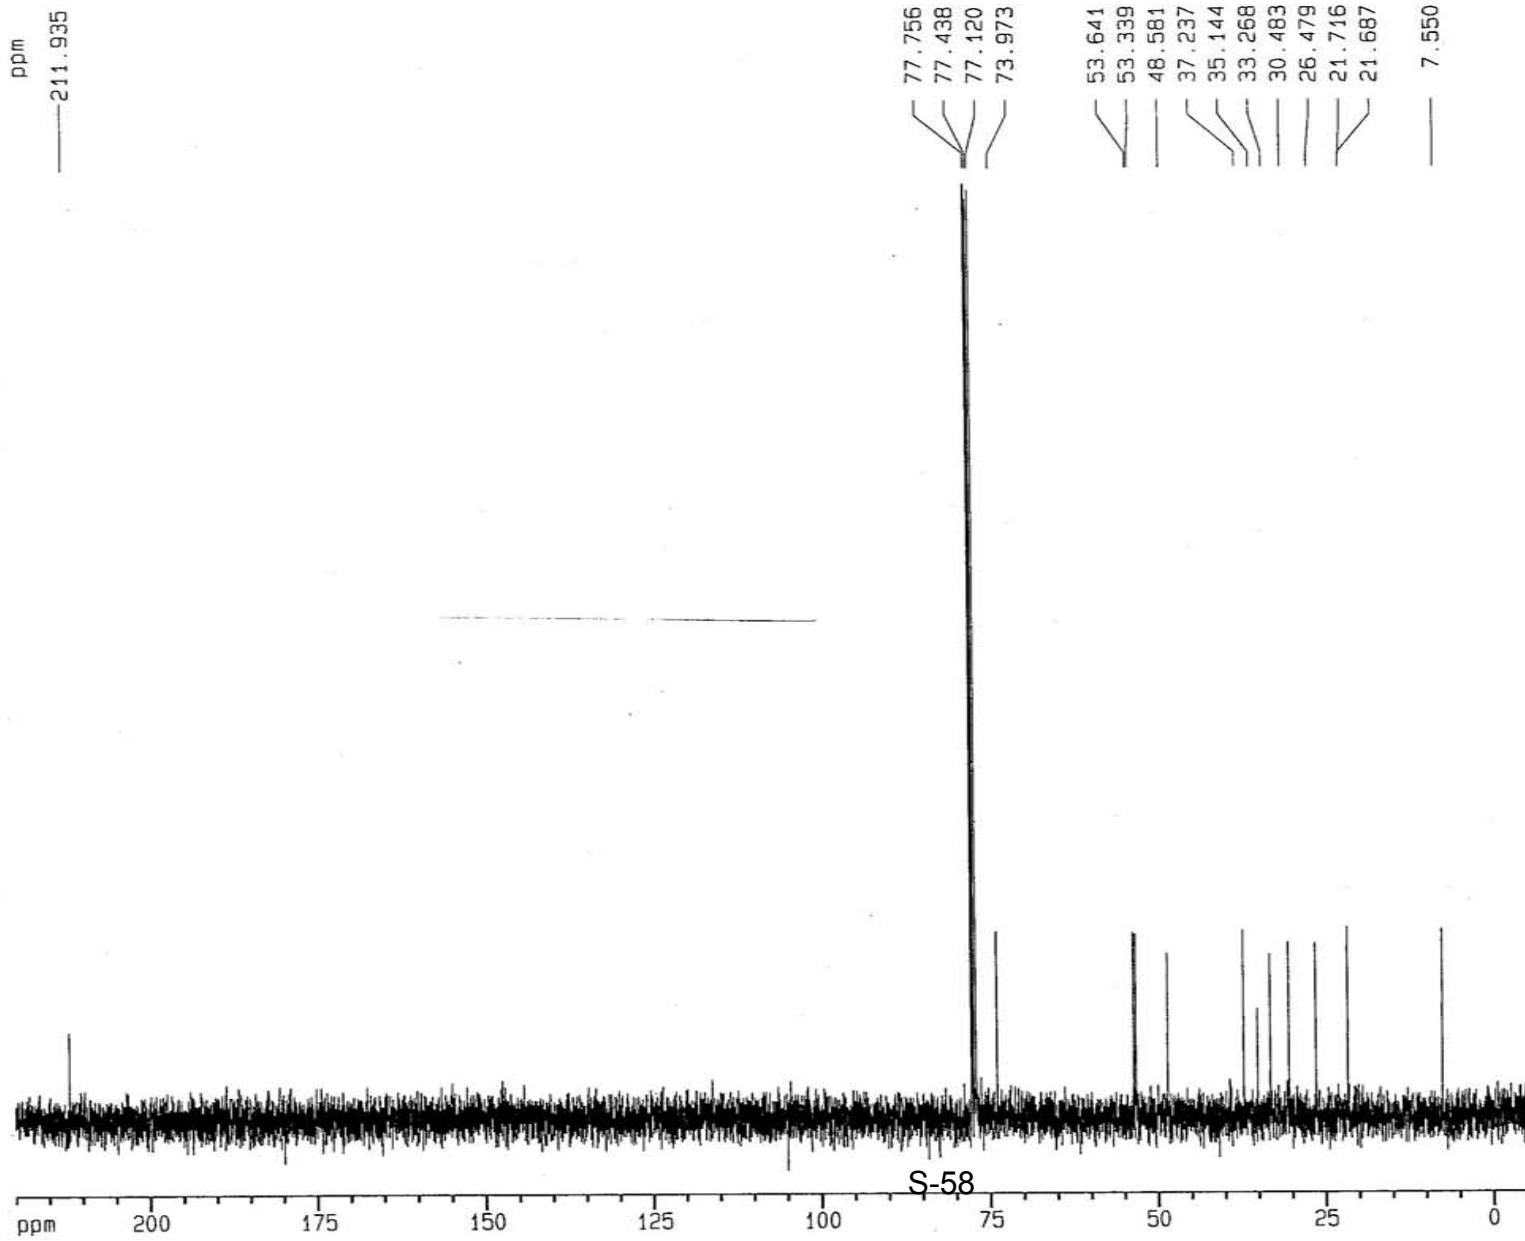

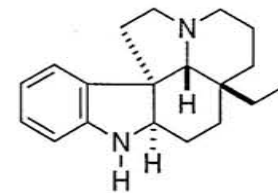

**(+)-Aspidospermidine (1)**

EXPNO 1  
PROCNO 1

F2 - Acquisition Parameters

Date\_ 500000  
Time 15.22  
INSTRUM drx400  
PROBHD 5 mm Multinu  
PULPROG zg30  
TD 32768  
SOLVENT CDCl3  
NS 16  
DS 2  
SWH 4789.272 Hz  
FIDRES 0.146157 Hz  
AQ 3.4210291 sec  
RG 256  
DW 104.400 usec  
DE 4.50 usec  
TE 300.0 K  
D1 1.00000000 sec  
P1 7.70 usec  
DE 4.50 usec  
SF01 400.1320007 MHz  
NUC1 1H  
PL1 -6.00 dB

F2 - Processing parameters

SI 16384  
SF 400.1300094 MHz  
WDW EM  
SSB 0  
LB 0.30 Hz  
GB 0  
PC 1.00

1D NMR plot parameters

CX 20.00 cm  
F1P 10.166 ppm  
F1 4067.84 Hz  
F2P -0.272 ppm  
F2 -108.74 Hz  
PPMCM 0.52190 ppm/cm  
HZCM 208.82909 Hz/cm

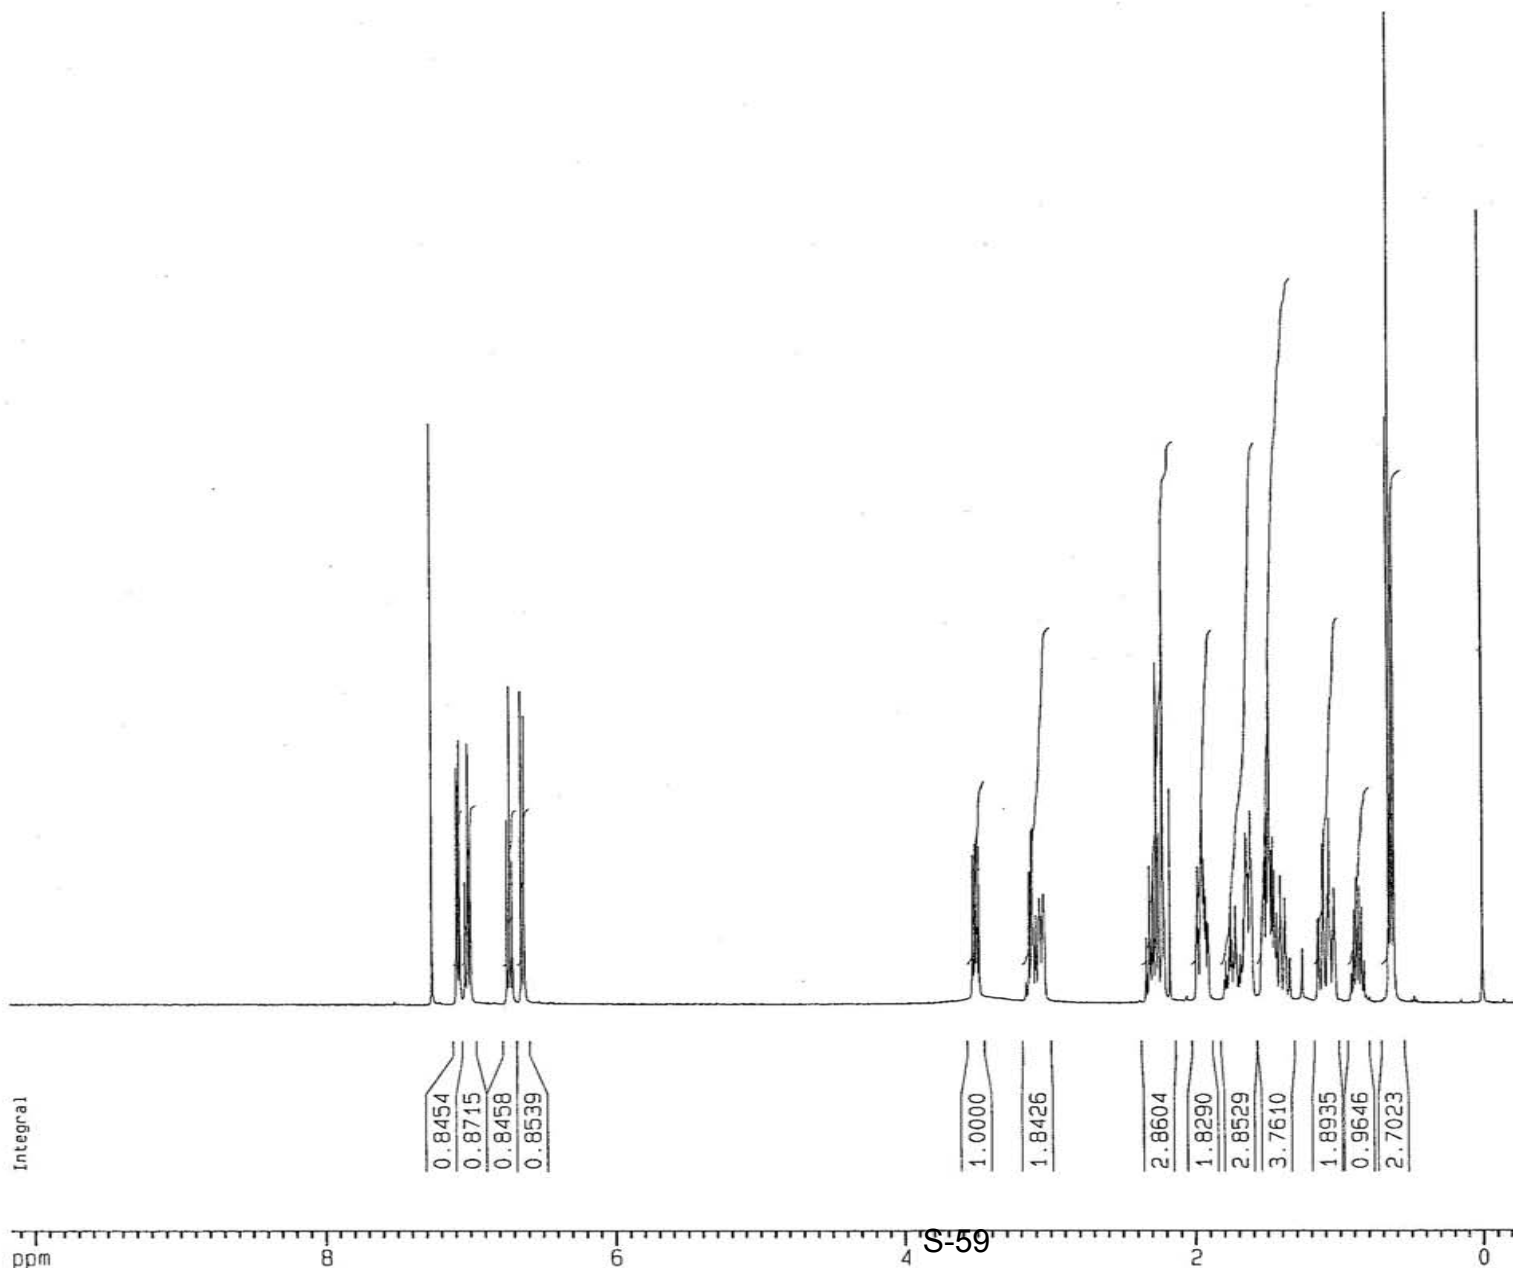

S-59

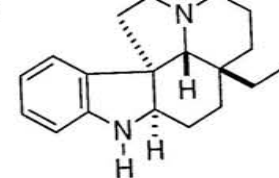

**(+)-Aspidospermidine (1)**

Current Data Parameters  
 NAME raj-3-71-prdt  
 EXPNO 2  
 PROCNO 1

F2 - Acquisition Parameters

Date\_ 500000  
 Time 17.29  
 INSTRUM drx400  
 PROBHD 5 mm Multinu  
 PULPROG zgpg30  
 TD 65536  
 SOLVENT CDC13  
 NS 1024  
 DS 2  
 SWH 23148.148 Hz  
 FIDRES 0.353213 Hz  
 AQ 1.4156276 sec  
 RG 4096  
 DW 21.600 usec  
 DE 4.50 usec  
 TE 300.0 K  
 d11 0.0300000 sec  
 d12 0.0000200 sec  
 PL13 18.00 dB  
 D1 0.05000000 sec  
 CPDPRG2 waltz16  
 PCPD2 100.00 usec  
 SF02 400.1316005 MHz  
 NUC2 1H  
 PL2 -6.00 dB  
 PL12 18.00 dB  
 P1 6.90 usec  
 DE 4.50 usec  
 SF01 100.6232933 MHz  
 NUC1 13C  
 PL1 -6.00 dB

F2 - Processing parameters

SI 32768  
 SF 100.6127741 MHz  
 WDW EM  
 SSB 0  
 LB 1.00 Hz  
 GB 0  
 PC 1.40

1D NMR plot parameters

CX 20.00 cm  
 F1P 204.851 ppm  
 F1 20610.64 Hz  
 F2P -1.215 ppm  
 F2 -122.26 Hz  
 PPMCM 10.30331 ppm/cm  
 HZCM 1036.64478 Hz/cm

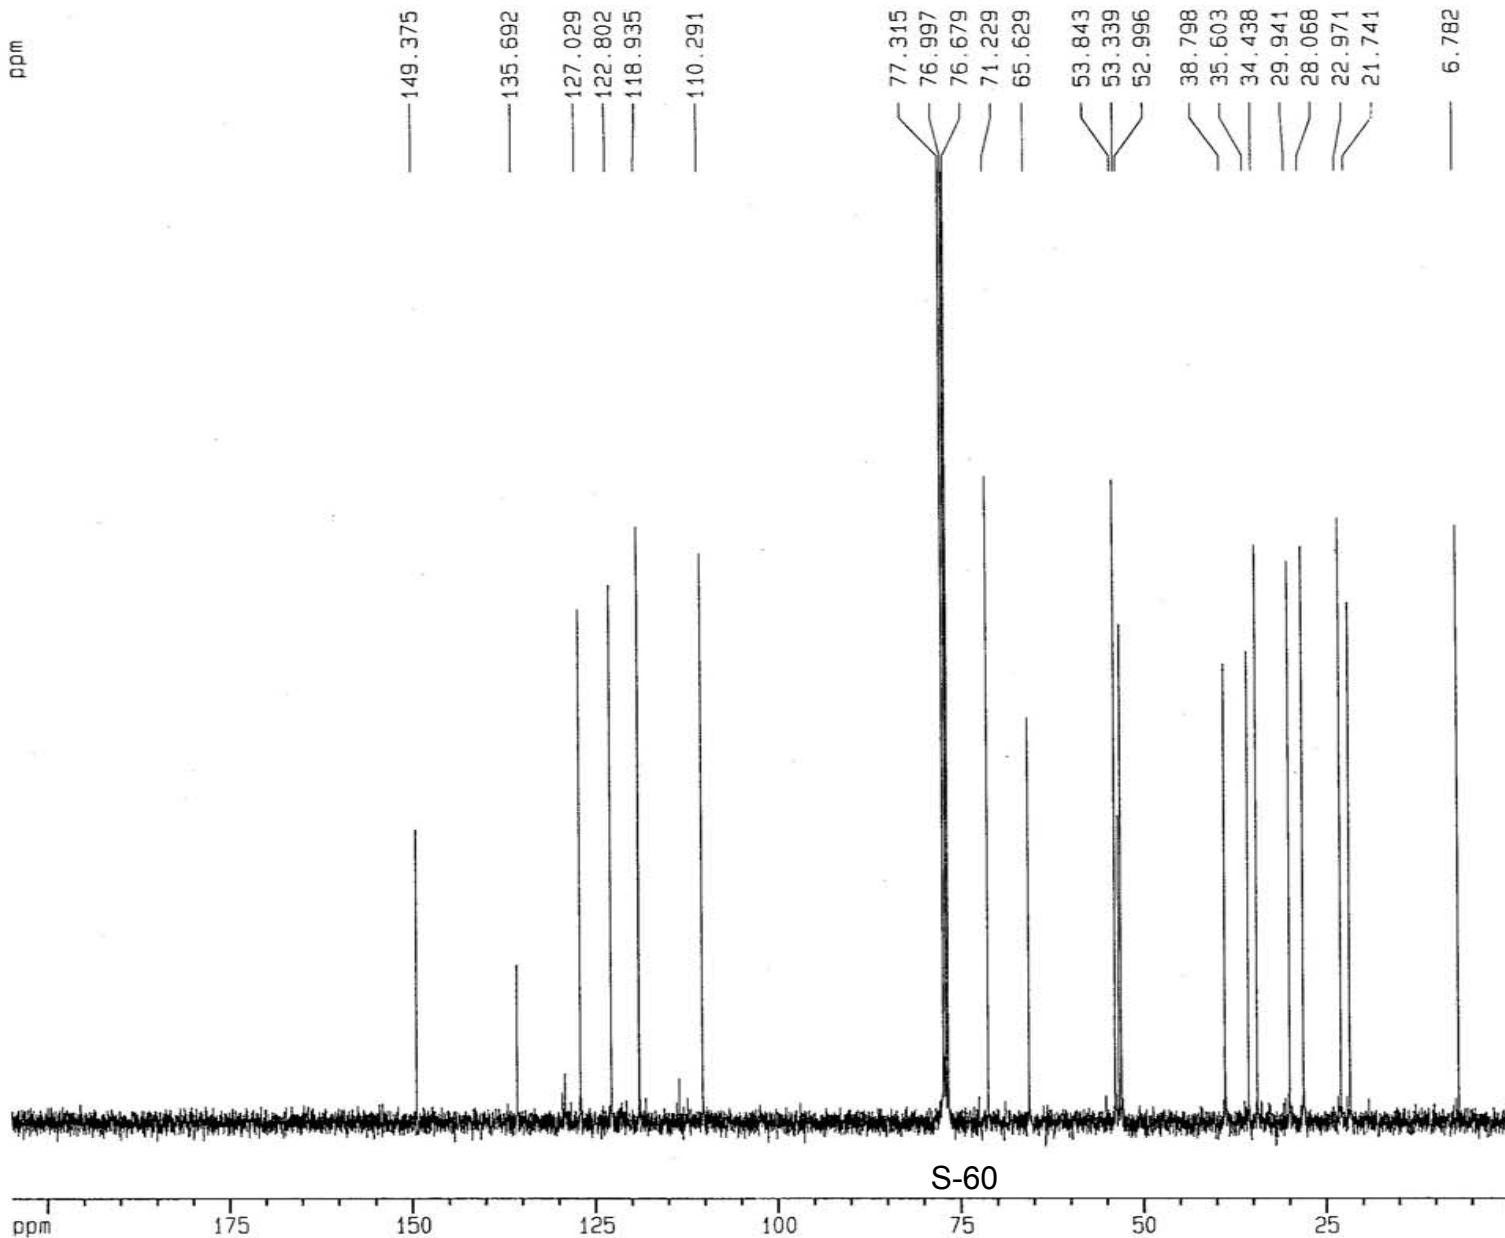

S-60

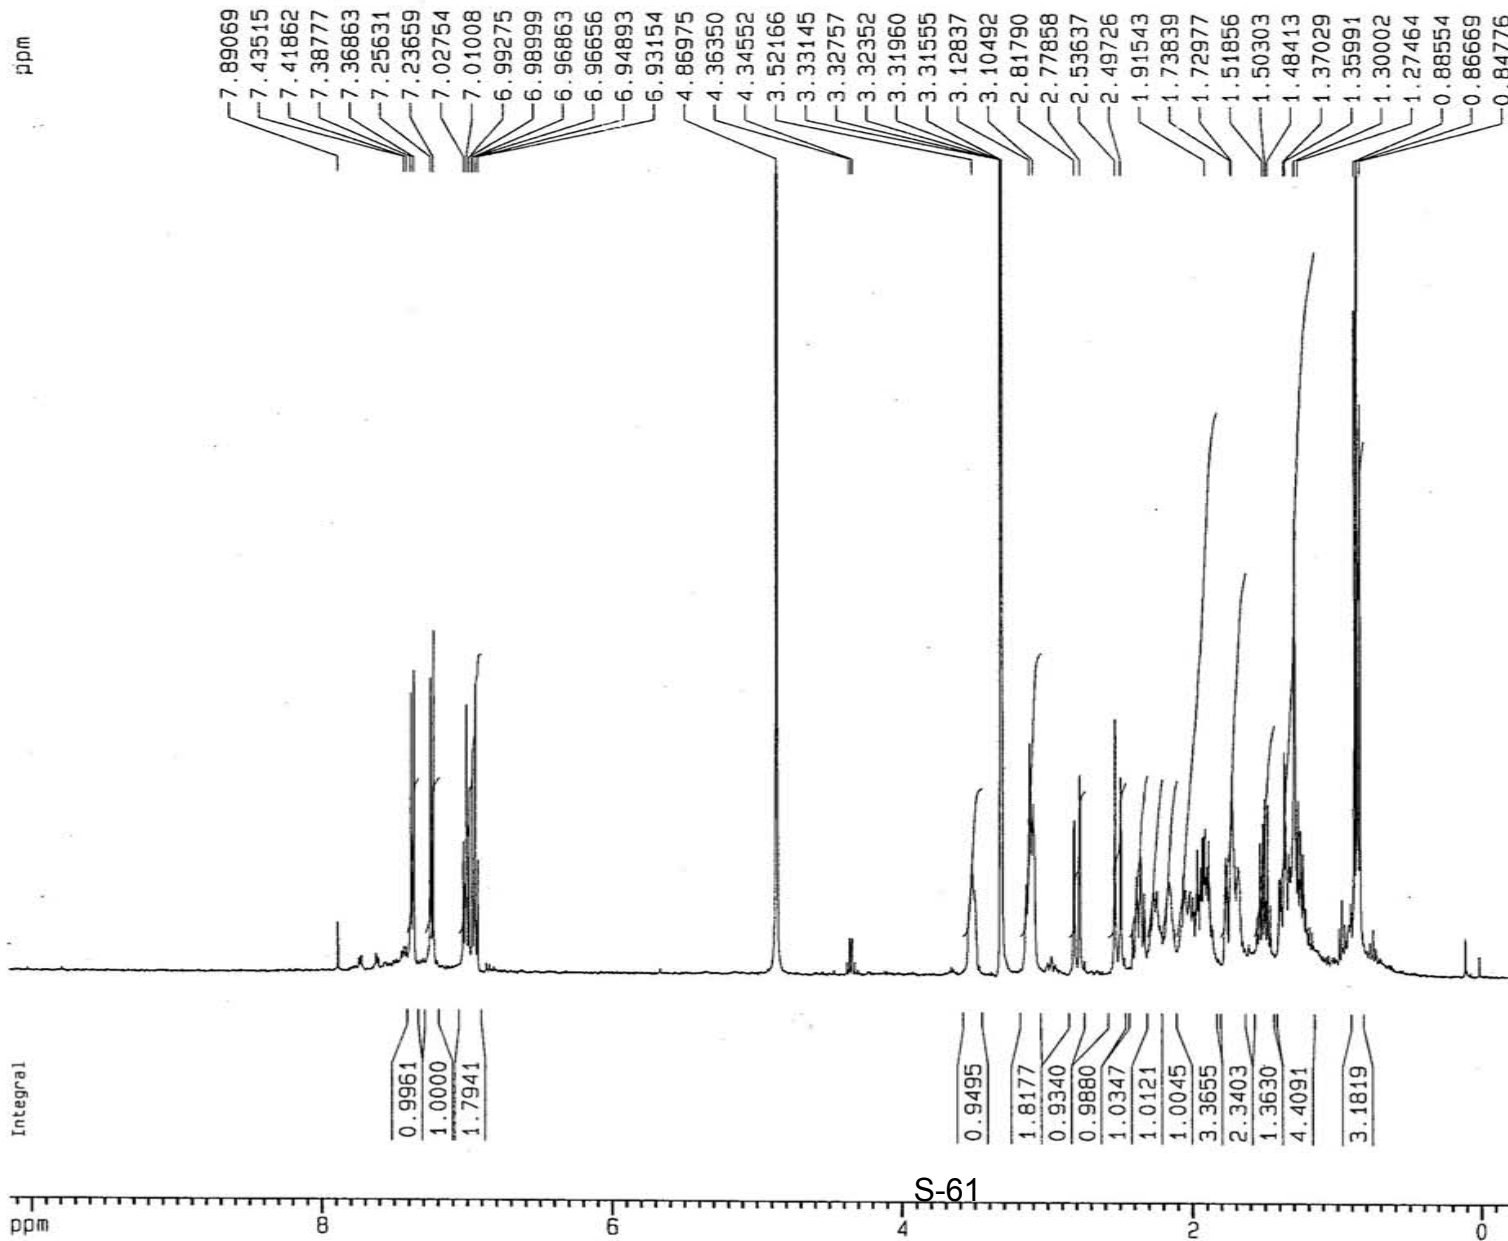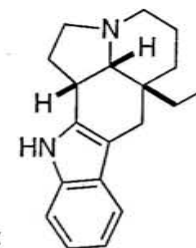

31

C  
N  
E  
F  
31

s  
h  
1  
1

F2 - Acquisition Parameters

Date\_ 1000210  
Time 8.49  
INSTRUM drx400  
PROBHD 5 mm Multinu  
PULPROG zg30  
TD 32768  
SOLVENT MeOH  
NS 16  
DS 2  
SWH 4789.272 Hz  
FIDRES 0.146157 Hz  
AQ 3.4210291 sec  
RG 574.7  
DW 104.400 usec  
DE 4.50 usec  
TE 300.0 K  
D1 1.00000000 sec  
P1 7.70 usec  
DE 4.50 usec  
SFO1 400.1320007 MHz  
NUC1 1H  
PL1 -6.00 dB

F2 - Processing parameters

SI 16384  
SF 400.1300020 MHz  
WDW EM  
SSB 0  
LB 0.30 Hz  
GB 0  
PC 1.00

1D NMR plot parameters

CX 20.00 cm  
F1P 10.151 ppm  
F1 4061.69 Hz  
F2P -0.253 ppm  
F2 -101.29 Hz  
PPMCM 0.52020 ppm/cm  
HZCM 208.14912 Hz/cm

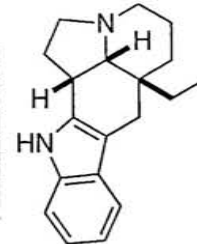

31

5  
ip  
2  
1

PROCNO

F1 - Acquisition Parameters

Date\_ 1000219  
Time 8.38  
INSTRUM drx400  
PROBHD 5 mm Multinu  
PULPROG zgpg30  
TD 65536  
SOLVENT CDC13  
NS 20493  
DS 2  
SWH 23148.148 Hz  
FIDRES 0.353213 Hz  
AQ 1.4156276 sec  
RG 2048  
DW 21.600 usec  
DE 4.50 usec  
TE 300.0 K  
d1' 0.0300000 sec  
d12 0.0000200 sec  
PL13 18.00 dB  
D1 0.05000000 sec  
CPDPRG2 waltz16  
PCPD2 100.00 usec  
SF02 400.1316005 MHz  
NUC2 1H  
PL2 -6.00 dB  
PL12 18.00 dB  
P1 6.90 usec  
DE 4.50 usec  
SF01 100.6232933 MHz  
NUC1 13C  
PL1 -6.00 dB

F2 - Processing parameters

SI 32768  
SF 100.6128554 MHz  
WDW EM  
SSB 0  
LB 1.00 Hz  
GB 0  
PC 1.40

1D NMR plot parameters

CX 20.00 cm  
F1P 203.834 ppm  
F1 20508.32 Hz  
F2P -2.687 ppm  
F2 -270.33 Hz  
PPMCM 10.32604 ppm/cm  
HZCM 1038.93262 Hz/cm

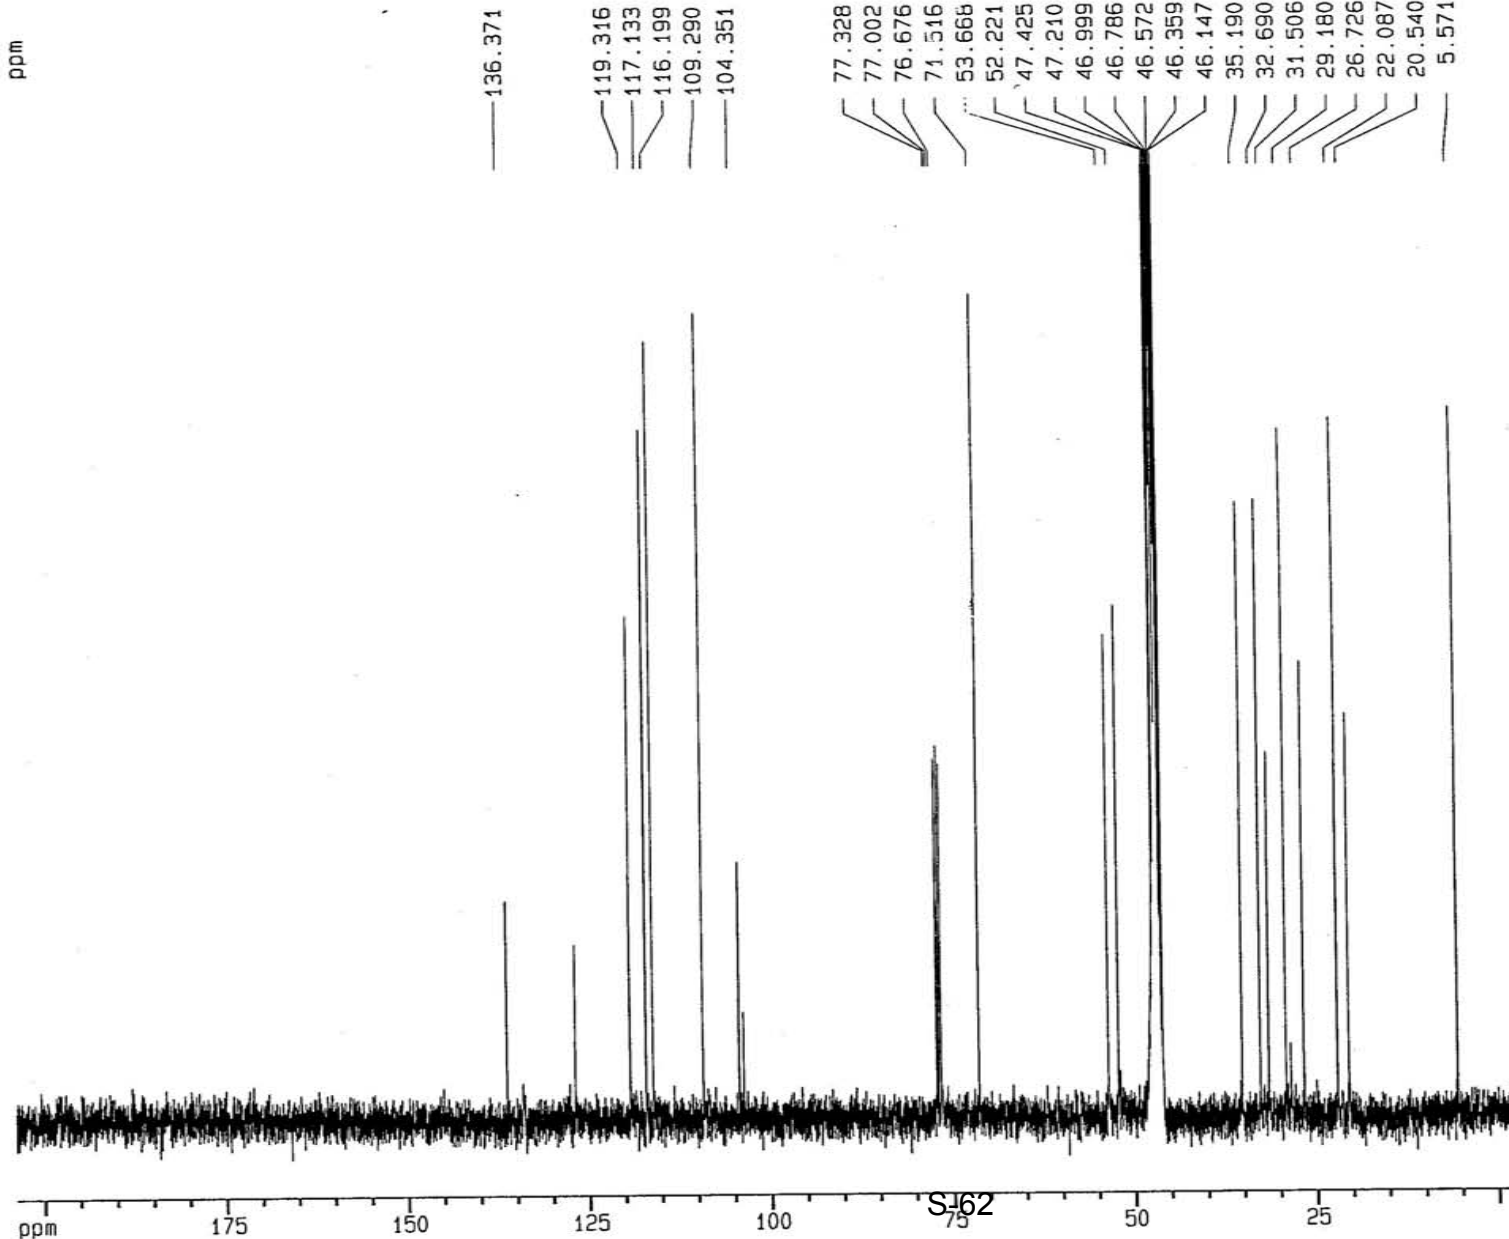

Supplement: NIHMS63119-supplement-2si20051008_06.pdf [file NIHMS63119-supplement-2si20051008_06.pdf]
